# Supplementary material
Source: PubMed Central journal article supplement (PMC117595)
Supplement: pnas_99_1_535__1.pdf [file pnas_99_1_535__1.pdf]

Supporting information for Sanjur *et al.* (2002) *Proc. Natl. Acad. Sci. USA* **99** (1), 535–540.  
(10.1073/pnas.012577299)

Aligned sequences for *Cucurbita* species. Highly variable regions were excluded from the alignment.

*Cucurbita andreana* 1

GGTCTGATTCTTATTGTGCGCCTTGTGAGCGCGTTTGGATCCGCGAAGGCAATCGCTCGGATGTTCTCCTAACCCAACCC  
GGGAACGGACTGGAGGGAATCGCAGCATGGGGAATGTCCGCGTCTCGTCGCAAGGCTCATTGTTGAGTTGTGGGTC----  
GGGGGTTTATCTGATCAAGGGCCGGGGCACAAGGGTCTGGTACTATCCAGGTGCGAAGAACCACGGGGGTGACTGCAAT  
GAGCAGAAATCTCACTTACCGGCCTAAACGACGAGCAAACACTCNAACGTGAGAGCAAGGGATCACCCAAGGAATGGACG  
AGCTCCAAGGAGGGAGGCAAGAACCATGCTTTTCAGAGACCTAACCCAACCCAAC-----  
GGTCCCGAATCTTATCTGAATTGCGAGAATAACTGACTA---AGCCATGCCTATATATA----  
GGCTCATTCTCCAAACGGCGCGGGGCCAAGCCTTTAGGTTGTTTAAAGTAGATTGGGTGACAGATCGGCCATAGCAGTACT  
CCGGGATATAAACCAGGGCAACAAATGTGAGCATAACGACGATGCCGCCCGTTTTTCATTTTCGTGGAAGTCCCCGCCAGAG  
GAAAGAAAGGGCTGTAGGTGATGGTGCCTTCCGCTTCTTATCTAGAGAGGGATGAATAAAGGCGGGCCGCTTCAACGGGA  
CCTAT---TCTCTTAATAGGCGGCAAAGCAGAATAGGAAA-GGGGCCGAG-TGATGAGTG----  
CCTTTTTAGCCTTTTTCTAAAGACTCTCATGTGAAGCTAACATGGCTCGCTACATACAAGTATAGCCAAAGAAAGATGAG  
ACGGGACAGACGGTTCAGAGGCCGACGCGGGACTACCATAGGAAAGCCCGCCCCCTCCCGCTAACATAGAAAGTATTCCC  
GTAAC--TAG--TCTCTATGTGAATCTCTTCCCGACCAGGCC---GAATCGGGCCACCCTTGGGGTGGG-  
AATGGCTCAGCCACATGCATCATTGATGAAAGCACTCCAGTCCAGTCCGCTCCTCGAAGTGGCTTGTCAACCACGCTT  
TCCCTCCCTCAAACAATGCTCCTCACAAAAGCC----C-----  
TTGGGGCAACACAGCAATGAGTAGTTCGCTCCAGGACTCCACCCCTCGAGAGC-----  
AGGATGCCGGCCGAGATGGAGCTGGAAGCCAACCTAGACTTTCTGGGGCTTGTCCCAACATCTAAATCAAATTGTTGGC  
AGGCTAGAAAAGGAACCAGCCCAGCCTCGGAAATCAAGCTTTGCGTGGTATGCCCTGCCTATTCACTCGGACAATG--  
CTCTGAACACGAAAGTGTGCAGTTCGCCCCCTTCTCCCAT----  
GCTGAGTCACAGGCAGCGCCTCGGAAAGCACGGACGAGCCACATGCAGGGAAACTTGCACGTGTGGTTCTGGCCGGGGAC  
CCCCGTATACTGTACTAATATGTGTAGGTCCCCGTAATTCGAGTGAGATTGTCTATGGCGCAAAGCAGATATGGTC

*Cucurbita andreana* 2

GGTCTGATTCTTATTGTGCGCCTTGTGAGCGCGTTTGGATCCGCGAAGGCAATCGCTCGGATGTTCTCCTAACCCAACCC  
GGGAACGGACTGGAGGGAATCGCAGCATGGGGAATGTCCGCGTCTCGTCGCAAGGCTCATTGTTGAGTTGTGGGTC----  
GGGGGTTTATCTGATCAAGGGCCGGGGCACAAGGGTCTGGTACTATCCAGGTGCGAAGAACCACGGGGGTGACTGCAAT  
GAGCAGAAATCTCACTTACCGGCCTAAACGACGAGCAAACACTCGAACGTGAGAGCAAGGGATCACCCAAGGAATGGACG  
AGCTCCAAGGAGGGAGGCAAGAACCATGCTTTTCAGAGACCTAACCCAACCCAAC-----  
GGTCCCGAATCTTATCTGAATTGCGAGAATAACTGACTA---AGCCATGCCTATATATA----  
GGCTCATTCTCCAAACGGCGCGGGGCCAAGCCTTTAGGTTGTTTAAAGTAGATTGGGTGACAGATCGGCCATAGCAGTACT  
CCGGGATATAAACCAGGGCAACAAATGTGAGCATAACGACGATGCCGCCCGTTTTTCATTTTCGTGGAAGTCCCCGCCAGAG  
GAAAGAAAGGGCTGTAGGTGATGGTGCCTTCCGCTTCTTATCTAGAGAGGGATGAATAAAGGCGGGCCGCTTCAACGGGA  
CCTAT---TCTCTTAATAGGCGGCAAAGCAGAATAGGAAA-GGGGCCGAG-TGATGAGTG----  
CCTTTTTAGCCTTTTTCTAAAGACTCTCATGTGAAGCTAACATGGCTCGCTACATACAAGTATAGCCAAAGAAAGATGAG  
ACGGGACAGACGGTTCAGAGGCCGACGCGGGACTACCATAGGAAAGCCCGCCCCCTCCCGCTAACATAGAAAGTATTCCC  
GTAAC--TAG--TCTCTATGTGAATCTCTTCCCGACCAGGCC---GAATCGGGCCACCCTTGGGGTGGG-  
AATGGCTCAGCCACATGCATCATTGATGAAAGCACTCCAGTCCAGTCCGCTCCTCGAAGTGGCTTGTCAACCACGCTT  
TCCCTCCCTCAAACAATGCTCCTCACAAAAGCC----C-----  
TTGGGGCAACACAGCAATGAGTAGTTCGCTCCAGGACTCCACCCCTCGAGAGC-----  
AGGATGCCGGCCGAGATGGAGCTGGAAGCCAACCTAGACTTTCTGGGGCTTGTCCCAACATCTAAATCAAATTGTTGGC  
AGGCTAGAAAAGGAACCAGCCCAGCCTCGGAAATCAAGCTTTGCGTGGTATGCCCTGCCTATTCACTCGGACAATG--  
CTCTGAACACGAAAGTGTGCAGTTCGCCCCCTTCTCCCAT----  
GCTGAGTCACAGGCAGCGCCTCGGAAAGCACGGACGAGCCACATGCAGGGAAACTTGCACGTGTGGTTCTGGCCGGGGAC  
CCCCGTATACTGTACTAATATGTGTAGGTCCCCGTAATTCGAGTGAGATTGTCTATGGCGCAAAGCAGATATGGTC

*Cucurbita andreana* 3

GGTCTGATTCTTATTGTGCGCCTTGTGAGCGCGTTTGGATCCGCGAAGGCAATCGCTCGGATGTTCTCCTAACCCAACCC  
GGGAACGGACTGGAGGGAATCGCAGCATGGGGAATGTCCGCGTCTCGTCGCAAGGCTCATTGTTGAGTTGTGGGTC----  
GGGGGTTTATCTGATCAAGGGCCGGGGCACAAGGGTCTGGTACTATCCAGGTGCGAAGAACCACGGGGGTGACTGCAAT  
GAGCAGAAATCTCACTTACCGGCCTAAACGACGAGCAAACACTCGAACGTGAGAGCAAGGGATCACCCAAGGAATGGACG  
AGCTCCAAGGAGGGAGGCAAGAACCATGCTTTTCAGAGACCTAACCCAACCCAAC-----  
GGTCCCGAATCTTATCTGAATTGCGAGAATAACTGACTA---AGCCATGCCTATATATA----  
GGCTCATTCTCCAAACGGCGCGGGGCCAAGCCTTTAGGTTGTTTAAAGTAGATTGGGTGACAGATCGGCCATAGCAGTACT  
CCGGGATATAAACCAGGGCAACAAATGTGAGCATAACGACGATGCCGCCCGTTTTTCATTTTCGTGGAAGTCCCCGCCAGAG  
GAAAGAAAGGGCTGTAGGTGATGGTGCCTTCCGCTTCTTATCTAGAGAGGGATGAATAAAGGCGGGCCGCTTCAACGGGA  
CCTAT---TCTCTTAATAGGCGGCAAAGCAGAATAGGAAA-GGGGCCGAG-TGATGAGTG----  
CCTTTTTAGCCTTTTTCTAAAGACTCTCATGTGAAGCTAACATGGCTCGCTACATACAAGTATAGCCAAAGAAAGATGAG

ACGGGACAGACGGTTCAGAGGCCGAGCGGGACTACCATAGGAAAGCCCGCCCCCTCCCGCTAACATAGAAAGTGATTCCC  
GTAAC--TAG--TCTCTATGTGAATCTCTTCCCGACCAGGCC----GAATCGGGCCACCCTTGGGGTGGG-  
AATGGCTCAGCCACATGCATCATTGATGAAAGCACTCCAGTCCAGTGCCTCCTCGAAGTGGCTTGTCAACCACGCTT  
TCCCTCCCTCAAAACAATGCTCCTCACCAAAAGCC----C-----  
TTGGGGCAACACAGCAATGAGTAGTTTCGCTCCAGGACTCCACCCCTCGAGAGC-----  
AGGATGCCGGCCGAGATGGAGCTGGAAGCCAACCTAGACTTTCTGGGGCTTGTCCCAACATCTAAATCAAATTGTTGGC  
AGGCTAGAAAAGGAACCAGCCAGCCTCGGAAATCAAGCTTTGCGTGGTATGCCCTGCCTATTCACTCGGACAATG--  
CTCTGAACACGAAAGTGTGCAGTTCGGCCCCCTTCTCCCAT----  
GCTGAGTACAGGCAGCGCCTCGGAAAGCACGGACGAGCCACATGCAGGGAACTTGCACGTGTGGTTCTGGCCGGGGAC  
CCCGGTATACTGTACTAATATGTGTAGGTCCCCGTAATTCGAGTGAGATTGTGCATGGCGCAAAGCAGATATGGTC

Cucurbita maxima 4

GGTCTGATTCTTATTGTGCGCCTTGTGAGCGCGTTTGGATCCGCGAAGGCAATCGCTCGGATGTTCTCCTAACCCAACCC  
GGGAACGGACTGGAGGGAATCGCAGCATGGGGAATGTCCGCGTCTCGTTCGCAAGGCTCATTGTTGAGTTGTGGGTC----  
GGGGGTTTATCTGATCAAGGGCCGGGGCACAAGGGTCTGGTACTATCCAGGTGCGAAGAACCACGGGGGTGACTGCAAT  
GAGCAGAAATCTCACTTACCGGCCTAAACGACGAGCAAACTCGAACGTGAGAGCAAGGGATCACCCAAGGAATGGACG  
AGCTCCAAGGAGGGAAGAACCATGCTTTTCAGAGACCTAACCCAACCCAAC-----  
GGTCCCGAATCTTATCTGAATTGCGAGAATAACTGACTA---AGCCATGCCTATATATA----  
GGCTCATTCTCCAAACGGCGCGGGGCCAAGCCTTTAGGTTGTTTAAAGTAGATTGGGTGACAGATCGGCCATAGCAGTACT  
CCGGGATATAAACAGGGCAACAAATGTGAGCATAACGACGATGCCGCCGTTTTTCATTTTCGTGGAAGTCCCCGCCAGAG  
GAAAGAAAGGGCTGTAGGTGATGGTGCCTTCCGCTTCTTATCTAGAGAGGGATGAATAAAGGCGGGCCGCTTCAACGGGA  
CCTAT---TCTCTTAATAGGCGGCAAAGCAGAATAGGAAA-GGGGCCGAG-TGATGAGTG----  
CCTTTTTAGCCTTTTTCTAAAGACTCTCATGTGAAGCTAACATGGCTCGCTACATACAAGTATAGCCAAAGAAAGATGAG  
ACGGGACAGACGGTTCAGAGGCCGAGCGGGACTACCATAGGAAAGCCCGCCCCCTCCCGCTAACATAGAAAGTGATTCCC  
GTAAC--TAG--TCTCTATGTGAATCTCTTCCCGACCAGGCC----GAATCGGGCCACCCTTGGGGTGGG-  
AATGGCTCAGCCACATGCATCATTGATGAAAGCACTCCAGTCCAGTGCCTCCTCGAAGTGGCTTGTCAACCACGCTT  
TCCCTCCCTCAAAACAATGCTCCTCACCAAAAGCC----C-----  
TTGGGGCAACACAGCAATGAGTAGTTTCGCTCCAGGACTCCACCCCTCGAGAGC-----  
AGGATGCCGGCCGAGATGGAGCTGGAAGCCAACCTAGACTTTCTGGGGCTTGTCCCAACATCTAAATCAAATTGTTGGC  
AGGCTAGAAAAGGAACCAGCCAGCCTCGGAAATCAAGCTTTGCGTGGTATGCCCTGCCTATTCACTCGGACAATG--  
CTCTGAACACGAAAGTGTGCAGTTCGGCCCCCTTCTCCCAT----  
GCTGAGTACAGGCAGCGCCTCGGAAAGCACGGACGAGCCACATGCAGGGAACTTGCACGTGTGGTTCTGGCCGGGGAC  
CCCGGTATACTGTACTAATATGTGTAGGTCCCCGTAATTCGAGTGAGATTGTGCATGGCGCAAAGCAGATATGGTC

Cucurbita maxima 5

TGTGCGCCTTGTGAGCGCTTTGGATCCGCGAAGGCAATCGCTCGGATGTTCTCCTAACCCAACCCGGGAACGGACTGGA  
GGGAATCGCAGCATGGGGAATGTCCGCGTCTCGTTCGCAAGGCTCATTGTTGAGTTGTGGGTC----  
GGGGGTTTATCTGATCAAGGGCCGGGGCACAAGGGTCTGGTACTATCCAGGTGCGAAGAACCACGGGGGTGACTGCAAT  
GAGCAGAAATCTCACTTACCGGCCTAAACGACGAGCAAACTCGAACGTGAGAGCAAGGGATCACCCAAGGAATGGACG  
AGCTCCAAGGAGGGAGGCAAGAACCATGCTTTTCAGAGACCTAACCCAACCCAAC-----  
GGTCCCGAATCTTATCTGAATTGCGAGAATAACTGACTA---AGCCATGCCTATATATA----  
GGCTCATTCTCCAAACGGCGCGGGGCCAAGCCTTTAGGTTGTTTAAAGTAGATTGGGTGACAGATCGGCCATAGCAGTACT  
CCGGGATATAAACAGGGCAACAAATGTGAGCATAACGACGATGCCGCCGTTTTTCATTTTCGTGGAAGTCCCCGCCAGAG  
GAAAGAAAGGGCTGTAGGTGATGGTGCCTTCCGCTTCTTATCTAGAGAGGGATGAATAAAGGCGGGCCGCTTCAACGGGA  
CCTAT---TCTCTTAATAGGCGGCAAAGCAGAATAGGAAA-GGGGCCGAG-TGATGAGTG----  
CCTTTTTAGCCTTTTTCTAAAGACTCTCATGTGAAGCTAACATGGCTCGCTACATACAAGTATAGCCAAAGAAAGATGAG  
ACGGGACAGACGGTTCAGAGGCCGAGCGGGACTACCATAGGAAAGCCCGCCCCCTCCCGCTAACATAGAAAGTGATTCCC  
GTAAC--TAG--TCTCTATGTGAATCTCTTCCCGACCAGGCC----GAATCGGGCCACCCTTGGGGTGGG-  
AATGGCTCAGCCACATGCATCATTGATGAAAGCACTCCAGTCCAGTGCCTCCTCGAAGTGGCTTGTCAACCACGCTT  
TCCCTCCCTCAAAACAATGCTCCTCACCAAAAGCC----C-----  
TTGGGGCAACACAGCAATGAGTAGTTTCGCTCCAGGACTCCACCCCTCGAGAGC-----  
AGGATGCCGGCCGAGATGGAGCTGGAAGCCAACCTAGACTTTCTGGGGCTTGTCCCAACATCTAAATCAAATTGTTGGC  
AGGCTAGAAAAGGAACCAGCCAGCCTCGGAAATCAAGCTTTGCGTGGTATGCCCTGCCTATTCACTCGGACAATG--  
CTCTGAACACGAAAGTGTGCAGTTCGGCCCCCTTCTCCCAT----  
GCTGAGTACAGGCAGCGCCTCGGAAAGCACGGACGAGCCACATGCAGGGAACTTGCACGTGTGGTTCTGGCCGGGGAC  
CCCGGTATACTGTACTAATATGTGTAGGTCCCCGTAATTCGAGTGAGATTGTGCATGGCGCAAAGCAGATATGGTC

Cucurbita maxima 6

GGTCTGATTCTTATTGTGCGCCTTGTGAGCGCGTTTGGATCCGCGAAGGCAATCGCTCGGATGTTCTCCTAACCCAACCC  
GGGAACGGACTGGAGGGAATCGCAGCATGGGGAATGTCCGCGTCTCGTTCGCAAGGCTCATTGTTGAGTTGTGGGTC----  
GGGGGTTTATCTGATCAAGGGCCGGGGCACAAGGGTCTGGTACTATCCAGGTGCGAAGAACCACGGGGGTGACTGCAAT  
GAGCAGAAATCTCACTTACCGGCCTAAACGACGAGCAAACTCGAACGTGAGAGCAAGGGATCACCCAAGGAATGGACG  
AGCTCCAAGGAGGGAGGCAAGAACCATGCTTTTCAGAGACCTAACCCAACCCAAC-----  
GGTCCCGAATCTTATCTGAATTGCGAGAATAACTGACTA---AGCCATGCCTATATATA----  
GGCTCATTCTCCAAACGGCGCGGGGCCAAGCCTTTAGGTTGTTTAAAGTAGATTGGGTGACAGATCGGCCATAGCAGTACT  
CCGGGATATAAACAGGGCAACAAATGTGAGCATAACGACGATGCCGCCGTTTTTCATTTTCGTGGAAGTCCCCGCCAGAG  
GAAAGAAAGGGCTGTAGGTGATGGTGCCTTCCGCTTCTTATCTAGAGAGGGATGAATAAAGGCGGGCCGCTTCAACGGGA

CCTAT----TCTCTTAATAGGCGGCAAAGCAGAATAGGAAA-GGGGCCGAG-TGATGAGTG----  
CCTTTTTAGCCTTTTTCTAAAGACTCTCATGTGAAGCTAACATGGCTCGCTACATACAAGTATAGCCAAAGAAAGATGAG  
ACGGGACAGACGGTCAGAGGCCCGCAGCGGGACTACCATAGGAAAGCCCGCCCCCTCCCGCTAACATAGAAAGTGATTCCC  
GTAAC--TAG--TCTCTATGTGAATCTTTCCCGACCAGGCC----GAATCGGGCCACCCTTGGGGTGGG-  
AATGGCTCAGCCACATGCATCATTTTGTGAAAGCACTCCAGTCCAGTCCGCTCCTCGAAGTGGCTTGTCAACCACGCTT  
TCCCTCCCTCAAACAATGCTCCTCACCAAAAGCC----C-----  
TTGGGGCAACACAGCAATGAGTAGTTCGCTCCAGGACTCCACCCCTCGAGAGC-----  
AGGATGCCGGCCGAGATGGAGCTGGAAGCCAACCTAGACTTTTCTGGGGCTTGTCCCAACATCTAAATCAAATTGTTGGC  
AGGCTAGAAAAGGAACCAGCCCAGCCTCGGAAATCAAGCTTTGCGTGGTATGCCCTGCCTATTCACTCGGACAATG--  
CTCTGAACACGAAAGTGTGCAGTTCGCCCCCTTCTCCCAT----  
GCTGAGTCACAGGCAGCGCTCGGAAAGCACGGACGAGCCACATGCAGGGAACTTGCACGTGTGGTTCTGGCCGGGGAC  
CCCGGTATACTGTACTAATATGTGTAGGTCCCCGTAATTCGAGTGAGATTGTCTATGGCGCAAAGCAGATATGGTC  
Cucurbita maxima 7

GGTCTGATTCTTATTGTGCGCCTTGTGAGCGCGTTTTGGATCCGCGAAGGCAATCGCTCGGATGTTCTCCTAACCCAACCC  
GGGAACGGACTGGAGGGAATCGCAGCATGGGGAATGTCCGCGTCTCGTCGCAAGGCTCATTGTTGAGTTGTGGGTC----  
GGGGGTTTTATCTGATCAAGGGCCGGGGCACAAGGGTCTGGTACTATCCAGGTGCGAAGAACCACGGGGGTGACTGCAAT  
GAGCAGAAATCTCACTTACCGGCCTAAACGACGAGCAAACACTCGAACGTGAGAGCAAGGGATCACCCAAGGAATGGACG  
AGCTCCAAGGAGGGAGGCAAGAACCATGCTTTTCAGAGACCTAACCCAACCCAAC-----  
GGTCCCGAATCTTATCTGAATTGCGAGAATAACTGACTA---AGCCATGCCTATATATA----  
GGCTCATTCTCAAACGGCGCGGGGCCAAGCCTTTAGGTTGTTTTAAGTAGATTGGGTGACAGATCGGCCATAGCAGTACT  
CCGGGATATAAACAGGGCAACAATGTTCGAGCATAACGACGATGCCGCGCGTTTTTCATTTTCGTGGAAGTCCCCGCCAGAG  
GAAAGAAAGGGCTGTAGGTGATGGTGCCTTCCGCTTCTTATCTAGAGAGGGATGAATAAAGGCGGGCCGCTTCAACGGGA  
CCTAT----TCTCTTAATAGGCGGCAAAGCAGAATAGGAAA-GGGGCCGAG-TGATGAGTG----  
CCTTTTTAGCCTTTTTCTAAAGACTCTCATGTGAAGCTAACATGGCTCGCTACATACAAGTATAGCCAAAGAAAGATGAG  
ACGGGACAGACGGTCAGAGGCCGACGCGGGACTACCATAGGAAAGCCCGCCCCCTCCCGCTAACATAGAAAGTGATTCCC  
GTAAC--TAG--TCTCTATGTGAATCTTTCCCGACCAGGCC----GAATCGGGCCACCCTTGGGGTGGG-  
AATGGCTCAGCCACATGCATCATTTTGTGAAAGCACTCCAGTCCAGTCCGCTCCTCGAAGTGGCTTGTCAACCACGCTT  
TCCCTCCCTCAAACAATGCTCCTCACCAAAAGCC----C-----  
TTGGGGCAACACAGCAATGAGTAGTTCGCTCCAGGACTCCACCCCTCGAGAGC-----  
AGGATGCCGGCCGAGATGGAGCTGGAAGCCAACCTAGACTTTTCTGGGGCTTGTCCCAACATCTAAATCAAATTGTTGGC  
AGGCTAGAAAAGGAACCAGCCCAGCCTCGGAAATCAAGCTTTGCGTGGTATGCCCTGCCTATTCACTCGGACAATG--  
CTCTGAACACGAAAGTGTGCAGTTCGCCCCCTTCTCCCAT----  
GCTGAGTCACAGGCAGCGCTCGGAAAGCACGGACGAGCCACATGCAGGGAACTTGCACGTGTGGTTCTGGCCGGGGAC  
CCCGGTATACTGTACTAATATGTGTAGGTCCCCGTAATTCGAGTGAGATTGTCTATGGCGCAAAGCAGATATGGTC  
Cucurbita maxima 8

GGTCTGATTCTTATTGTGCGCCTTGTGAGCGCGTTTTGGATCCGCGAAGGCAATCGCTCGGATGTTCTCCTAACCCAACCC  
GGGAACGGACTGGAGGGAATCGCAGCATGGGGAATGTCCGCGTCTCGTCGCAAGGCTCATTGTTGAGTTGTGGGTC----  
GGGGGTTTTATCTGATCAAGGGCCGGGGCACAAGGGTCTGGTACTATCCAGGTGCGAAGAACCACGGGGGTGACTGCAAT  
GAGCAGAAATCTCACTTACCGGCCTAAACGACGAGCAAACACTCGAACGTGAGAGCAAGGGATCACCCAAGGAATGGACG  
AGCTCCAAGGAGGGAGGCAAGAACCATGCTTTTCAGAGACCTAACCCAACCCAAC-----  
GGTCCCGAATCTTATCTGAATTGCGAGAATAACTGACTA---AGCCATGCCTATATATA----  
GGCTCATTCTCAAACGGCGCGGGGCCAAGCCTTTAGGTTGTTTTAAGTAGATTGGGTGACAGATCGGCCATAGCAGTACT  
CCGGGATATAAACAGGGCAACAATGTTCGAGCATAACGACGATGCCGCGCGTTTTTCATTTTCGTGGAAGTCCCCGCCAGAG  
GAAAGAAAGGGCTGTAGGTGATGGTGCCTTCCGCTTCTTATCTAGAGAGGGATGAATAAAGGCGGGCCGCTTCAACGGGA  
CCTAT----TCTCTTAATAGGCGGCAAAGCAGAATAGGAAA-GGGGCCGAG-TGATGAGTG----  
CCTTTTTAGCCTTTTTCTAAAGACTCTCATGTGAAGCTAACATGGCTCGCTACATACAAGTATAGCCAAAGAAAGATGAG  
ACGGGACAGACGGTCAGAGGCCGACGCGGGACTACCATAGGAAAGCCCGCCCCCTCCCGCTAACATAGAAAGTGATTCCC  
GTAAC--TAG--TCTCTATGTGAATCTTTCCCGACCAGGCC----GAATCGGGCCACCCTTGGGGTGGG-  
AATGGCTCAGCCACATGCATCATTTTGTGAAAGCACTCCAGTCCAGTCCGCTCCTCGAAGTGGCTTGTCAACCACGCTT  
TCCCTCCCTCAAACAATGCTCCTCACCAAAAGCC----C-----  
TTGGGGCAACACAGCAATGAGTAGTTCGCTCCAGGACTCCACCCCTCGAGAGC-----  
AGGATGCCGGCCGAGATGGAGCTGGAAGCCAACCTAGACTTTTCTGGGGCTTGTCCCAACATCTAAATCAAATTGTTGGC  
AGGCTAGAAAAGGAACCAGCCCAGCCTCGGAAATCAAGCTTTGCGTGGTATGCCCTGCCTATTCACTCGGACAATG--  
CTCTGAACACGAAAGTGTGCAGTTCGCCCCCTTCTCCCAT----  
GCTGAGTCACAGGCAGCGCTCGGAAAGCACGGACGAGCCACATGCAGGGAACTTGCACGTGTGGTTCTGGCCGGGGAC  
CCCGGTATACTGTACTAATATGTGTAGGTCCCCGTAATTCGAGTGAGATTGTCTATGGCGCAAAGCAGATATGGTC  
Cucurbita maxima 9

GGTCTGATTCTTATTGTGCGCCTTGTGAGCGCGTTTTGGATCCGCGAAGGCAATCGCTCGGATGTTCTCCTAACCCAACCC  
GGGAACGGACTGGAGGGAATCGCAGCATGGGGAATGTCCGCGTCTCGTCGCAAGGCTCATTGTTGAGTTGTGGGTC----  
GGGGGTTTTATCTGATCAAGGGCCGGGGCACAAGGGTCTGGTACTATCCAGGTGCGAAGAACCACGGGGGTGACTGCAAT  
GAGCAGAAATCTCACTTACCGGCCTAAACGACGAGCAAACACTCGAACGTGAGAGCAAGGGATCACCCAAGGAATGGACG  
AGCTCCAAGGAGGGAGGCAAGAACCATGCTTTTCAGAGACCTAACCCAACCCAAC-----  
GGTCCCGAATCTTATCTGAATTGCGAGAATAACTGACTA---AGCCATGCCTATATATA----  
GGCTCATTCTCAAACGGCGCGGGGCCAAGCCTTTAGGTTGTTTTAAGTAGATTGGGTGACAGATCGGCCATAGCAGTACT

CCGGGATATAAACAGGGCAACAAATGTCGAGCATAACGACGATGCCGCCCGTTTTTCATTTTCGTGGAAGTCCCCGCCAGAG  
GAAAGAAAGGGCTGTAGGTGATGGTGCCTTCCGCTTCTTATCTAGAGAGGGATGAATAAAGGCGGGCCGCTTCAACGGGA  
CCTAT----TCTCTTAATAGGCGGCAAAGCAGAATAGGAAA-GGGGCCGAG-TGATGAGTG----  
CCTTTTTAGCCTTTTTCTAAAGACTCTCATGTGAAGCTAACATGGCTCGCTACATACAAGTATAGCCAAAGAAAGATGAG  
ACGGGACAGACGGTACAGGGCCGAGCGGGACTACCATAGGAAAGCCCCCCCCCTCCCGCTAACATAGAAAGTGATTCCC  
GTAAC--TAG--TCTCTATGTGAATCTCTTCCCGACCAGGCC----GAATCGGGCCACCACCTGGGGTGGG-  
AATGGCTCAGCCACATGCATCATTGATGAAAGCACTCCAGTCCAGTGCCTCCTCGAAGTGGCTTGTCAACCACGCTT  
TCCCTCCCTCAAAACAATGCTCCTCACCAAAAGCC----C-----  
TTGGGGCAACACAGCAATGAGTAGTTCGCTCCAGGACTCCACCCCTCGAGAGC-----  
AGGATGCCGGCCGAGATGGAGCTGGAAGCCAACCTAGACTTTCTGGGGCTTGTCCCAACATCTAAATCAAATTGTTGGC  
AGGCTAGAAAAGGAACAGCCAGCCTCGGAAATCAAGCTTTGCGTGGTATGCCCTGCCTATTCACTCGGACAATG--  
CTCTGAACACGAAAGTGTGCAGTTCGCCCCCTTCTCCCAT----  
GCTGAGTCACAGGCAGCGCCTCGGAAAGCACGGACGAGCCACATGCAGGGAAACTTGCACGTGTGGTTCTGGCCGGGGAC  
CCCGGTATACTGTACTAATATGTGTAGGTCCCCGTAATTCGAGTGAGATTGTGCATGGCGCAAAGCAGATATGGTC

*Cucurbita maxima* 10

GGTCTGATTCTTATTGTGCGCCTTGTGAGCGCGTTTTGGATCCGCGAAGGCAATCGCTCGGATGTTCTCCTAACCCAACCC  
GGGAACGGACTGGAGGGAATCGCAGCATGGGGAATGTCCGCGTCTCGTTCGCAAGGCTCATTGTTGAGTTGTGGGTC----  
GGGGGTTTTATCTGATCAAGGGCCGGGGCACAAGGGTCTGGTACTATCCAGGTGCGAAGAACCACGGGGGTGACTGCAAT  
GAGCAGAAATCTCACTTACCGGCCTAAACGACGAGCAAACACTCGAACGTGAGAGCAAGGGATCACCCAAGGAATGGACG  
AGCTCCAAGGAGGGAGGCAAGAACCATGCTTTTCAGAGACCTAACCCAACCCAAC-----  
GGTCCCGAATCTTATCTGAATTGCGAGAATAACTGACTA---AGCCATGCCTATATATA----  
GGCTCATTCTCCAAACGGCGGGCCGAGCCTTTAGGTTGTTTAAAGTAGATTGGGTGACAGATCGGCCATAGCAGTACT  
CCGGGATATAAACAGGGCAACAAATGTCGAGCATAACGACGATGCCGCCGTTTTTCATTTTCGTGGAAGTCCCCGCCAGAG  
GAAAGAAAGGGCTGTAGGTGATGGTGCCTTCCGCTTCTTATCTAGAGAGGGATGAATAAAGGCGGGCCGCTTCAACGGGA  
CCTAT----TCTCTTAATAGGCGGCAAAGCAGAATAGGAAA-GGGGCCGAG-TGATGAGTG----  
CCTTTTTAGCCTTTTTCTAAAGACTCTCATGTGAAGCTAACATGGCTCGCTACATACAAGTATAGCCAAAGAAAGATGAG  
ACGGGACAGACGGTACAGGGCCGAGCGGGACTACCATAGGAAAGCCCCCCCCCTCCCGCTAACATAGAAAGTGATTCCC  
GTAAC--TAG--TCTCTATGTGAATCTCTTCCCGACCAGGCC----GAATCGGGCCACCACCTGGGGTGGG-  
AATGGCTCAGCCACATGCATCATTGATGAAAGCACTCCAGTCCAGTGCCTCCTCGAAGTGGCTTGTCAACCACGCTT  
TCCCTCCCTCAAAACAATGCTCCTCACCAAAAGCC----C-----  
TTGGGGCAACACAGCAATGAGTAGTTCGCTCCAGGACTCCACCCCTCGAGAGC-----  
AGGATGCCGGCCGAGATGGAGCTGGAAGCCAACCTAGACTTTCTGGGGCTTGTCCCAACATCTAAATCAAATTGTTGGC  
AGGCTAGAAAAGGAACAGCCAGCCTCGGAAATCAAGCTTTGCGTGGTATGCCCTGCCTATTCACTCGGACAATG--  
CTCTGAACACGAAAGTGTGCAGTTCGCCCCCTTCTCCCAT----  
GCTGAGTCACAGGCAGCGCCTCGGAAAGCACGGACGAGCCACATGCAGGGAAACTTGCACGTGTGGTTCTGGCCGGGGAC  
CCCGGTATACTGTACTAATATGTGTAGGTCCCCGTAATTCGAGTGAGATTGTGCATGGCGCAAAGCAGATATGGTC

*Cucurbita ecuadorensis* 11

GTCTGATTCTTATTGTGCGCCTTGTGAGCGCGTTTTGGATCCGCGAAGGCAATCGCTCGGATGTTCTCCTAACCCAACCCG  
GGAACGGACTGGAGGGAATCGCAGCATGGGGAATGTCCGCGTCTCGTTCGCAAGGCTCATTGTTGAGTTGTGGGTC----  
GGGGGTTTTATCTGATCAAGGGCCGGGGCACAAGGGTCTGGTACTATCCAGGTGCGAAGAACCACGGGGGTGACTGCAAT  
GAGCAGAAATCTCACTTACCGGCCTAAACGACGAGCAAACACTCGAACGTGAGAGCAAGGGATCACCCAAGGAATGGACG  
AGCTCCAAGGAGGGAGGCAAGAACCATGCTTTTCAGAGACCTAACCCAACCCAAC-----  
GGTCCCGAATCTTATCTGAATTGCGAGAATAACTGACTA---AGCCATGCCTATATATA----  
GGCTCATTCTCCAAACTAAGCGGGCCGAGCCTGACGGTTGTTTAAAGTAGATTGGGTGACAGATCGGCCATAGCAGTACT  
CCGGGATATAAACAGGGCAACAAATGTCGAGCATAACGACGATGCCGCCGTTTTTCATTTTCGTGGAAGTCCCCGCCAGAG  
GAAAGAAAGGGCTGTAGGTGATGGTGCCTTCCGCTTCTTATCTAGAGAGGGATGAATAAAGGCGGGCCGCTTCAACGGGA  
CCTAT----TCTCTTAATAGGCGGCAAAGCAGAATAGGAAA-GGGGCCGAG-TGATGAGTG----  
CCTTTTTAGCCTTTTTCTAAAGACTCTCATGTGAAGCTAACATGGCTCGCTACATACAAGTATAGCCAAAGAAAGATGAG  
ACGGGACAGACGGTACAGGGCCGAGCGGGACTACCATAGGAAAGCCCCCCCCCTCCCGCTAACATAGAAAGTGATTCCC  
GTAAC--TAG--TCTCTATGTGAATCTCTTCCCGACCAGGCC----GAATCGGGCCACCACCTGGGGTGGG-  
AATGGCTCAGCCACATGCATCATTGATGAAAGCACTCCAGTCCAGTGCCTCCTCGAAGTGGCTTGTCAACCACGCTT  
TCCCTCCCTCAAAACAATGCTCCTCACCAAAAGCC----C-----  
TTGGGGCAACACAGCAATGAGTAGTTCGCTCCAGGACTCCACCCCTCGAGAGC-----  
AGGATGCCGGCCGAGATGGAGCTGGAAGCCAACCTAGACTTTCTGGGGCTTGTCCCAACATCTAAATCAAATTGTTGGC  
AGGCTAGAAAAGGAACAGCCAGCCTCGGAAATCAAGCTTTGCGTGGTATGCCCTGCCTATTCACTCGGACAATG--  
CTCTGAACACGAAAGTGTGCAGTTCGCCCCCTTCTCCCAT----  
GCTGAGTCACAGGCAGCGCCTCGGAAAGCACGGACGAGCCACATGCAGGGAAACTTGCACGTGTGGTTCTGGCCGGGGAC  
CCCGGTATACTGTACTAATATGTGTAGGTCCCCGTAATTCGAGTGAGATTGTGCATGGCGCAAAGCAGATATGGTC

*Cucurbita ecuadorensis* 12

GGTCTGATTCTTATTGTGCGCCTTGTGAGCGCGTTTTGGATCCGCGAAGGCAATCGCTCGGATGTTCTCCTAACCCAACCC  
GGGAACGGACTGGAGGGAATCGCAGCATGGGGAATGTCCGCGTCTCGTTCGCAAGGCTCATTGTTGAGTTGTGGGTC----  
GGGGGTTTTATCTGATCAAGGGCCGGGGCACAAGGGTCTGGTACTATCCAGGTGCGAAGAACCACGGGGGTGACTGCAAT  
GAGCAGAAATCTCACTTACCGGCCTAAACGACGAGCAAACACTCGAACGTGAGAGCAAGGGATCACCCAAGGAATGGACG  
AGCTCCAAGGAGGGAGGCAAGAACCATGCTTTTCAGAGACCTAACCCAACCCAAC-----

GGTCCC GAATCTTATCTGAATTGCGAGAATAACTGACTA---AGCCATGCCTATATATA----  
GGCTCATTCTCCAACTAAGCGGGGCCAAGCCTGACGGTTGTTTAAAGTAGATTGGGTGACAGATCGGCCATAGCAGTACT  
CCGGGATATAAACAGGGCAACAATGTGAGCATAACGACGATGCCGCCGTTTTCATTTTCGTGGAAGTCCCCGCCAGAG  
GAAAGAAAGGGCTGTAGGTGATGGTGCCTCCGCTTCTTATCTAGAGAGGGATGAATAAAGCGGGCCGCTTCAACGGGA  
CCTAT---TCTCTTAATAGGCGGCAAAGCAGAATAGGAAA-GGGGCCGAG-TGATGAGTG----  
CCTTTTTAGCCTTTTTCTAAAGACTCTCATGTGAAGCTAACATGGCTCGCTACATACAAGTATAGCCAAAGAAAGATGAG  
ACGGGACAGACGGTCAGAGGCCGACGCGGGACTACCATAGGAAAGCCCCCCCCCTCCCGCTAACATAGAAAGTGATTCCC  
GTAAC--TAG--TCTCTATGTGAATCTCTTCCCGACCAGGCC----GAATCGGGCCACCACCTTGGGGTGGG-  
AATGGCTCAGCCACATGCATCATTGTGATGAAAGCACTCCAGTCCAGTTCGCTCCTCGAAGTGGCTTGTCAACCACGCTT  
TCCCTCCCTCAAAACAATGCTCCTCACC AAAAGCC----C-----  
TTGGGGCAACACAGCAATGAGTAGTTCGCTCCAGGACTCCACCCCTCGAGAGC-----  
AGGATGCCGGCCGAGATGGAGCTGGAAGCCAACCTAGACTTTCTGGGGCTTGTCCCAACATCTAAATCAAATTGTTGGC  
AGGCTAGAAAAGGAACCAGCCAGCCTCGGAAATCAAGCTTTGCGTGGTATGCCCTGCCTATTCACTCGGACAATG--  
CTCTGAACACGAAAGTGTGCAGTTCGCCCCCTTCTCCCAT----  
GCTGAGTCACAGGCAGCGCCTCGGAAAGCACGGACGAGCCACATGCAGGGAAACTTGCACGTGTGGTTCTGGCCGGGGAC  
CCCCGTATACTGTACTAATATGTGTAGGTCCCCGTAATTCGAGTGAGATTGTGCATGGCGCAAAGCAGATATGGTC

Cucurbita ecuadorensis 13

GGTCTGATTCTTATTGTGCGCCTTGTGAGCGCGTTTGGATCCGCGAAGGCAATCGCTCGGATGTTCTCCTAACCCAACCC  
GGGAACGGACTGGAGGGAATCGCAGCATGGGGAATGTCCGCGTCTCGTTCGCAAGGCTCATTTTGAGTTGTGGGTC----  
GGGGGTTTATCTGATCAAGGGCCGGGGCACAAGGGTCTGGTACTATCCAGGTGCGAAGAACCACGGGGGTGACTGCAAT  
GAGCAGAAATCTCACTTACC GGCC TAAACGACGAGCAAACTCGAACGTGAGAGCAAGGGATCACCCAAGGAATGGACG  
AGCTCCAAGGAGGAGGCAAGAACCATGCTTTAGAGACCTAACCCAACCAAC-----  
GGTCCC GAATCTTATCTGAATTGCGAGAATAACTGACTA---AGCCATGCCTATATATA----  
GGCTCATTCTCCAACTAAGCGGGGCCAAGCCTGACGGTTGTTTAAAGTAGATTGGGTGACAGATCGGCCATAGCAGTACT  
CCGGGATATAAACAGGGCAACAATGTGAGCATAACGACGATGCCGCCGTTTTCATTTTCGTGGAAGTCCCCGCCAGAG  
GAAAGAAAGGGCTGTAGGTGATGGTGCCTCCGCTTCTTATCTAGAGAGGGATGAATAAAGCGGGCCGCTTCAACGGGA  
CCTAT---TCTCTTAATAGGCGGCAAAGCAGAATAGGAAA-GGGGCCGAG-TGATGAGTG----  
CCTTTTTAGCCTTTTTCTAAAGACTCTCATGTGAAGCTAACATGGCTCGCTACATACAAGTATAGCCAAAGAAAGATGAG  
ACGGGACAGACGGTCAGAGGCCGACGCGGGACTACCATAGGAAAGCCCCCCCCCTCCCGCTAACATAGAAAGTGATTCCC  
GTAAC--TAG--TCTCTATGTGAATCTCTTCCCGACCAGGCC----GAATCGGGCCACCACCTTGGGGTGGG-  
AATGGCTCAGCCACATGCATCATTGTGATGAAAGCACTCCAGTCCAGTTCGCTCCTCGAAGTGGCTTGTCAACCACGCTT  
TCCCTCCCTCAAAACAATGCTCCTCACC AAAAGCC----C-----  
TTGGGGCAACACAGCAATGAGTAGTTCGCTCCAGGACTCCACCCCTCGAGAGC-----  
AGGATGCCGGCCGAGATGGAGCTGGAAGCCAACCTAGACTTTCTGGGGCTTGTCCCAACATCTAAATCAAATTGTTGGC  
AGGCTAGAAAAGGAACCAGCCAGCCTCGGAAATCAAGCTTTGCGTGGTATGCCCTGCCTATTCACTCGGACAATG--  
CTCTGAACACGAAAGTGTGCAGTTCGCCCCCTTCTCCCAT----  
GCTGAGTCACAGGCAGCGCCTCGGAAAGCACGGACGAGCCACATGCAGGGAAACTTGCACGTGTGGTTCTGGCCGGGGAC  
CCCCGTATACTGTACTAATATGTGTAGGTCCCCGTAATTCGAGTGAGATTGTGCATGGCGCAAAGCAGATATGGTC

Cucurbita ecuadorensis 14

GGTCTGATTCTTATTGTGCGCCTTGTGAGCGCGTTTGGATCCGCGAAGGCAATCGCTCGGATGTTCTCCTAACCCAACCC  
GGGAACGGACTGGAGGGAATCGCAGCATGGGGAATGTCCGCGTCTCGTTCGCAAGGCTCATTTTGAGTTGTGGGTC----  
GGGGGTTTATCTGATCAAGGGCCGGGGCACAAGGGTCTGGTACTATCCAGGTGCGAAGAACCACGGGGGTGACTGCAAT  
GAGCAGAAATCTCACTTACC GGCC TAAACGACGAGCAAACTCGAACGTGAGAGCAAGGGATCACCCAAGGAATGGACG  
AGCTCCAAGGAGGGAGGCAAGAACCATGCTTTAGAGACCTAACCCAACCAAC-----  
GGTCCC GAATCTTATCTGAATTGCGAGAATAACTGACTA---AGCCATGCCTATATATA----  
GGCTCATTCTCCAACTAAGCGGGGCCAAGCCTGACGGTTGTTTAAAGTAGATTGGGTGACAGATCGGCCATAGCAGTACT  
CCGGGATATAAACAGGGCAACAATGTGAGCATAACGACGATGCCGCCGTTTTCATTTTCGTGGAAGTCCCCGCCAGAG  
GAAAGAAAGGGCTGTAGGTGATGGTGCCTCCGCTTCTTATCTAGAGAGGGATGAATAAAGCGGGCCGCTTCAACGGGA  
CCTAT---TCTCTTAATAGGCGGCAAAGCAGAATAGGAAA-GGGGCCGAG-TGATGAGTG----  
CCTTTTTAGCCTTTTTCTAAAGACTCTCATGTGAAGCTAACATGGCTCGCTACATACAAGTATAGCCAAAGAAAGATGAG  
ACGGGACAGACGGTCAGAGGCCGACGCGGGACTACCATAGGAAAGCCCCCCCCCTCCCGCTAACATAGAAAGTGATTCCC  
GTAAC--TAG--TCTCTATGTGAATCTCTTCCCGACCAGGCC----GAATCGGGCCACCACCTTGGGGTGGG-  
AATGGCTCAGCCACATGCATCATTGTGATGAAAGCACTCCAGTCCAGTTCGCTCCTCGAAGTGGCTTGTCAACCACGCTT  
TCCCTCCCTCAAAACAATGCTCCTCACC AAAAGCC----C-----  
TTGGGGCAACACAGCAATGAGTAGTTCGCTCCAGGACTCCACCCCTCGAGAGC-----  
AGGATGCCGGCCGAGATGGAGCTGGAAGCCAACCTAGACTTTCTGGGGCTTGTCCCAACATCTAAATCAAATTGTTGGC  
AGGCTAGAAAAGGAACCAGCCAGCCTCGGAAATCAAGCTTTGCGTGGTATGCCCTGCCTATTCACTCGGACAATG--  
CTCTGAACACGAAAGTGTGCAGTTCGCCCCCTTCTCCCAT----  
GCTGAGTCACAGGCAGCGCCTCGGAAAGCACGGACGAGCCACATGCAGGGAAACTTGCACGTGTGGTTCTGGCCGGGGAC  
CCCCGTATACTGTACTAATATGTGTAGGTCCCCGTAATTCGAGTGAGATTGTGCATGGCGCAAAGCAGATATGGTC

Cucurbita ecuadorensis 15

GGTCTGATTCTTATTGTGCGCCTTGTGAGCGCGTTTGGATCCGCGAAGGCAATCGCTCGGATGTTCTCCTAACCCAACCC  
GGGAACGGACTGGAGGGAATCGCAGCATGGGGAATGTCCGCGTCTCGTTCGCAAGGCTCATTTTGAGTTGTGGGTC----  
GGGGGTTTATCTGATCAAGGGCCGGGGCACAAGGGTCTGGTACTATCCAGGTGCGAAGAACCACGGGGGTGACTGCAAT

GAGCAGAAATCTCACTTACCGGCCTAAACGACGAGCAAACACTCGAACGTGAGAGCAAGGGATCACCCAAGGAATGGACG  
AGCTCCAAGGAGGGAGGCAAGAACCATGCTTTTCAGAGACCTAACCCAACCCAAC-----  
GGTCCCGAATCTTATCTGAATTGCGAGAATAACTGACTA---AGCCATGCCTATATATA----  
GGCTCATTCTCCAAACTAAGCGGGCCCAAGCCTGACGGTTGTTTAAAGTAGATTGGGTGACAGATCGGCCATAGCAGTACT  
CCGGGATATAAACCCAGGGCAACAAATGTGAGCATAACGACGATGCCGCCCGTTTTTCATTTTCGTGGAAGTCCCCGCCAGAG  
GAAAGAAAGGGCTGTAGGTGATGGTGCCTTCCGCTTCTTATCTAGAGAGGGATGAATAAAGGCGGGCCGCTTCAACGGGA  
CCTAT---TCTCTTAATAGGCGGCAAGCAGAATAGGAAA-GGGGCCGAG-TGATGAGTG----  
CCTTTTTACCTTTTTCTAAAGACTCTCATGTGAAGCTAACATGGCTCGCTACATACAAGTATAGCCAAAGAAAGATGAG  
ACGGGACAGACGGTACAGAGGCCGACGCGGACTACCATAGGAAAGCCCGCCCCCTCCCGCTAACATAGAAAGTGATTCCC  
GTAAC--TAG--TCTCTATGTGAATCTCTTCCCGACCAGGCC----GAATCGGGCCACCCTTGGGGTGGG-  
AATGGCTCACCCACATGCATCATTGATGAAAGCACTCCAGTCCAGTCCGCTCCTCGAAGTGGCTTGTCAACCACGCTT  
TCCCTCCCTCAAACAATGCTCCTCACCAAAGCC-----C-----  
TTGGGGCAACACAGCAATGAGTAGTTCGCTCCAGGACTCCACCCCTCGAGAGC-----  
AGGATGCCGGCCGAGATGGAGCTGGAAGCCAACCTAGACTTTCTGGGGCTTGTCCCAACATCTAAATCAAATTGTTGGC  
AGGCTAGAAAAGGAACCCAGCCAGCCTCGGAAATCAAGCTTTGCGTGGTATGCCCTGCCTATTCACTCGGACAATG--  
CTCTGAACACGAAAGTGTGCAGTTCGCCCCCTTCTCCCAT-----  
GCTGAGTCACAGGCAGCCCTCGGAAAGCACGGACGAGCCACATGCAGGGAAACTTGCACGTGTGGTTCTGGCCGGGGAC  
CCCGGTATACTGTACTAATATGTGTAGGTCCCCGTAATTCGAGTGAGATTGTGCATGGCGCAAAGCAGATATGGTC

*Cucurbita ecuadorensis* 16

GGTCTGATTCTTATTGTGCGCCTTGTGAGCGCGTTTTGGATCCGCGAAGGCAATCGCTCGGATGTTCTCCTAACCCAACCC  
GGGAACGACTGGAGGGAATCGCAGCATGGGGAATGTCCGCTCTCGTCGCAAGGCTCATTTTGAGTTGTGGGTGTC----  
GGGGTTTTATCTGATCAAGGGCCGGGGCACAAGGTTCTGGTACTATCCAGGTGCGAAGAACCACGGGGGTGACTGCAAT  
GAGCAGAAATCTCACTTACCGGCCTAAACGACGAGCAAACACTCGAACGTGAGAGCAAGGGATCACCCAAGGAATGGACG  
AGCTCCAAGGAGGGAGGCAAGAACCATGCTTTTCAGAGACCTAACCCAACCCAAC-----  
GGTCCCGAATCTTATCTGAATTGCGAGAATAACTGACTA---AGCCATGCCTATATATA----  
GGCTCATTCTCCAAACTAAGCGGGCCCAAGCCTGACGGTTGTTTAAAGTAGATTGGGTGACAGATCGGCCATAGCAGTACT  
CCGGGATATAAACCCAGGGCAACAAATGTGAGCATAACGACGATGCCGCCCGTTTTTCATTTTCGTGGAAGTCCCCGCCAGAG  
GAAAGAAAGGGCTGTAGGTGATGGTGCCTTCCGCTTCTTATCTAGAGAGGGATGAATAAAGGCGGGCCGCTTCAACGGGA  
CCTAT---TCTCTTAATAGGCGGCAAGCAGAATAGGAAA-GGGGCCGAG-TGATGAGTG----  
CCTTTTTAGCCTTTTTCTAAAGACTCTCATGTGAAGCTAACATGGCTCGCTACATACAAGTATAGCCAAAGAAAGATGAG  
ACGGGACAGACGGTACAGAGGCCGACGCGGACTACCATAGGAAAGCCCGCCCCCTCCCGCTAACATAGAAAGTGATTCCC  
GTAAC--TAG--TCTCTATGTGAATCTCTTCCCGACCAGGCC----GAATCGGGCCACCCTTGGGGTGGG-  
AATGGCTCAGCCACATGCATCATTGATGAAAGCACTCCAGTCCAGTCCGCTCCTCGAAGTGGCTTGTCAACCACGCTT  
TCCCTCCCTCAAACAATGCTCCTCACAAAAGCC-----C-----  
TTGGGGCAACACAGCAATGAGTAGTTCGCTCCAGGACTCCACCCCTCGAGAGC-----  
AGGATGCCGGCCGAGATGGAGCTGGAAGCCAACCTAGACTTTCTGGGGCTTGTCCCAACATCTAAATCAAATTGTTGGC  
AGGCTAGAAAAGGAACCCAGCCAGCCTCGGAAATCAAGCTTTGCGTGGTATGCCCTGCCTATTCACTCGGACAATG--  
CTCTGAACACGAAAGTGTGCAGTTCGCCCCCTTCTCCCAT-----  
GCTGAGTCACAGGCAGCGCCTCGGAAAGCACGGACGAGCCACATGCAGGGAAACTTGCACGTGTGGTTCTGGCCGGGGAC  
CCCGGTATACTGTACTAATATGTGTAGGTCCCCGTAATTCGAGTGAGATTGTGCATGGCGCAAAGCAGATATGGTC

*Cucurbita sororia* 17

GGTCTTATTCTTATTGTGCGCCTTGTGAGCGCGTTTTGGATCCGCGAAGGCAATCGCTCGGATGTTCTCCTAACCCAACCC  
GGGAACAGACTGGAGGGAATCGCAGCATGGGGAATGTCCGCTCTCGTCGCAAGGCTCATTATAGTTGTGGGTGATAGG  
GGAGTTTATCTGATCAAGGGCCGGGGCACAAGGTTCTGGTACTATCCAGGTGCGAAGAACCACGGGGGTGACTGCAATG  
AGCAGAAATCTCACTACCGGCCTAAACGACGAGCAAACACTCGAACGTGAGAGCAAGGGATCACCCAAGGAATAGACGA  
GCTACAAGGAGGGAGGCAAGAACCATGCTTTTCAGAGACCTAACCCAACCCAAC-----  
GGTAACGGTCCCGAATCTGATCTGAATTGCGAGAATAACTGACTACTAAGCCATCCTATATATA----  
GGCTCATTCTCCAAACGGCACGGGGCCAAGCCTGACGGTTCTTTAAAGTAGATTGGGTGACAGATCGGCCATAGCAGTACT  
CCGGGATATAAACCCAGGGCAACAAATGTGAGCATAACGACCATGCCGCCCGTTTTTCATTTTCGTGGAAGTCCCCGCCAGAG  
GAAAGAAAGGGCTGTAGGTGATGGCGCGTTCCGCTTCTTATCTGAGAGGGATGAATAAAGGCGGGCCGCTTCAACGGGA  
CCTATTCTCTCTTAAATAGGCGGCAAGCAGAATAGGAAA-GGGGCCGAG-TGATTAGTG----  
CCTTTTTACCTTTTTCTAAAGACTCTCATGTGAAGCTAAGTAGGCTCGCTACATAAAAGTATAGCCAAAGAAAGATGAG  
ACGGGACAGACGGTACAGAGGCCGACGCGGACTACCATAGGAAAGCCCGCCCCCTCCCGCTAACATAGAAAGTGATTCCC  
GTAAC--TAGTGTCTCTATGTGAATCTCTTCCCGACCAGGCCGAATGAATCGGGTACCCTTGGCGTGGG-  
AATGGCTCAGCCACATGCATCATTGATGAAAGCACTCCAGTCCAGTCCGCTCCTCGAAGTGGCTTGTCAACCACGCTT  
TCCCTCCCTCAAACAATGCTCCTCACAAA-----C-----  
AATGAGTAGTTCGCTCCAGGACTCCACCCCTCGAGAGC-----  
AGGATGCCGGCCGAGATGGAGCTGGAAGCCAACCTAGACTTTCTGGGGCTTGTCCCAACATCTAAATCAAATTGTTGGC  
AGGCTAGAAAAGGAACCCAGCCAGCCTCGGAAATCAAGCTTTGCGTGGTATGCCCTGCCTATTCACTCGGACAATG--  
CTCTGAACACGAAAGTGTGCAGTTCGCCCCCTTCTCCCATCCATGCTGAGTACAGGCAGCGCCTCGGAAAGCACGTAC  
GAGCCACATGCAGGGAAACTTGCACGTGTGGTTCTGGCCGGGGACCCCGGTATACTGTACTAATATGTGTAGGTCCCCGT  
AATTCGAGTGAGATTGTGCATGGCGCAAAGCAGATATGGTC

*Cucurbita sororia* 18

GGTCTTATTCTTATTGTGCGCCTTGTGAGCGCGTTTTGGATCCGCGAAGGCAATCGCTCGGATGTTCTCCTAACCCAACCC

GGGAACAGACTGGAGGGAATCGCAGCATGGGGAATGTCCGCGTCTCGTTCGCAAGGCTCATTTTATAGTTGTGGGTGACTGCAATG  
GGAGTTTATCTGATCAAGGGCCGGGGCACAAGGGTCTGGTACTATCCAGGTGCGAAGAACCACGGGGGTGACTGCAATG  
AGCAGAAATCTCACTACCGGCCTAAACGACGAGCAAACTCGAACGTGAGAGCAAGGGATCACCCAAGGAATAGACGA  
GCTACAAGGAGGGAGGCAAGAACCATGCTTTTCAGAGACCTAACCCAACCAAC-----  
GGTAACGGTCCCGAATCAGATCTGAATTGCGAGAATAACTGACTACTAAGCCATCCCTATATATA----  
GGCTCATTCTCCAAACGGCACGGGGCCAAGCCTGACGGTCTTTTAAAGTAGATTGGGTGACAGATCGGCCATAGCAGTACT  
CCGGGATATAAACAGGGCAACAAATGTGAGCATAACGACCATGCCGCCGTTTTTCATTTTCGTGGAAGTCCCCGCCAGAG  
GAAAGAAAGGGCTGTAGGTGATGGCGCGTTCCGCTTCTTATCGTTCAGAGGGATGAATAAAGGCGGGCCGCTTCAACGGGA  
CCTATCCTCTCTCTTAATAGGCGGCAAAGCATAATAGGAAA-GGGGCCGAG-TGATTAGTG----  
CCTTTTTAGCCTTTTTCTAAAGACTCTCATGTGAAGCTAAGATGGCTCGCTACATAAAAAGTATAGCCAAAGAAAGATGAG  
ACGGGACAGACGGTTCAGAGGCCGAGCGGGACTACCATAGGAAAGCCCGCCCCCTCCCGCTAACATAGAAAGTGATTCCC  
GTAAC--TAGTGTCTCTATGTGAATCTCTTCCCGACCAGGCCGAATGAATCGGGTACCACCTTGGCGTGGG-  
AATGGCTCAGCCACATGCATCATTGATGAAAGCACTCCAGTCCAGTCCGCTCCTCGAAGTGGCTTGTCAACCACGCTT  
TCCCTCCCTCAAAACAATGCTCCTCACCAA-----CTTGGATTGGGG-----  
AATGAGTAGTTTCGCTCCAGGACTCCACCCCTCGAGAGC-----  
AGGATGCCGGCCGAGATGGAGCTGGAAGCCAACCGTCACTTTCTGGGGCTTGTCCCAACATCTAAATCAAATTGTTGGC  
AGGCTAGAAAAGGAACCAGCCAGCCTCTGAAATCAAGCTTTGCGTGGTATGCCCTGCCTATTCACTCGGACAATG--  
CTCTGAACACGAAAGTGTGCAGTTCTGCCCCCTTCTCCCATCCATGCTGAGTACAGGCAGCGCCTCGGAAAGCACGTAC  
GAGCCACATGCAGGGAACTTGCACGTGTGGTTCTGGCCGGGGACCCCGGTATACTGTACTAATATGTGTAGGTCCCCGT  
AATTCGAGTGAGATTGTCATGGCGCAAAGCAGATATGGTC

Cucurbita sororia 19

GGTCTTATTCTTATTGTGCGCCTTGTGAGCGCGTTTGGATCCGCGAAGGCAATCGCTCGGATGTTCTCCTAACCCAACCC  
GGGAACAGACTGGAGGGAATCGCAGCATGGGGAATGTCCGCGTCTCGTTCGCAAGGCTCATTTTATAGTTGTGGGTGACTGCAATG  
GGAGTTTATCTGATCAAGGGCCGGGGCACAAGGGTCTGGTACTATCCAGGTGCGAAGAACCACGGGGGTGACTGCAATG  
AGCAGAAATCTCACTACCGGCCTAAACGACGAGCAAACTCGAACGTGAGAGCAAGGGATCACCCAAGGAATAGACGA  
GCTACAAGGAGGGAGGCAAGAACCATGCTTTTCAGAGACCTAACCCAACCAAC-----  
GGTAACGGTCCCGAATCTGATCTGAATTGCGAGAATAACTGACTACTAAGCCATCCCTATATATA----  
GGCTCATTCTCCAAACGGCACGGGGCCAAGCCTGACGGTCTTTTAAAGTAGATTGGGTGACAGATCGGCCATAGCAGTACT  
CCGGGATATAAACAGGGCAACAAATGTGAGCATAACGACCATGCCGCCGTTTTTCATTTTCGTGGAAGTCCCCGCCAGAG  
GAAAGAAAGGGCTGTAGGTGATGGCGCGTTCCGCTTCTTATCGTTCAGAGGGATGAATAAAGGCGGGCCGCTTCAACGGGA  
CCTATCCTCTCTCTTAATAGGCGGCAAAGCATAATAGGAAA-GGGGCCGAG-TGATTAGTG----  
CCTTTTTAGCCTTTTTCTAAAGACTCTCATGTGAAGCTAAGATGGCTCGCTACATAAAAAGTATAGCCAAAGAAAGATGAG  
ACGGGACAGACGGTTCAGAGGCCGAGCGGGACTACCATAGGAAAGCCCGCCCCCTCCCGCTAACATAGAAAGTGATTCCC  
GTAAC--TAGTGTCTCTATGTGAATCTCTTCCCGACCAGGCCGAATGAATCGGGTACCACCTTGGCGTGGG-  
AATGGCTCAGCCACATGCATCATTGATGAAAGCACTCCAGTCCAGTCCGCTCCTCGAAGTGGCTTGTCAACCACGCTT  
TCCCTCCCTCAAAACAATGCTCCTCACCAA-----CTTGGATTGGGG-----  
AATGAGTAGTTTCGCTCCAGGACTCCACCCCTCGAGAGC-----  
AGGATGCCGGCCGAGATGGAGCTGGAAGCCAACCGTCACTTTCTGGGGCTTGTCCCAACATCTAAATCAAATTGTTGGC  
AGGCTAGAAAAGGAACCAGCCAGCCTCTGAAATCAAGCTTTGCGTGGTATGCCCTGCCTATTCACTCGGACAATG--  
CTCTGAACACGAAAGTGTGCAGTTCTGCCCCCTTCTCCCATCCATGCTGAGTACAGGCAGCGCCTCGGAAAGCACGTAC  
GAGCCACATGCAGGGAACTTGCACGTGTGGTTCTGGCCGGGGACCCCGGTATACTGTACTAATATGTGTAGGTCCCCGT  
AATTCGAGTGAGATTGTCATGGCGCAAAGCAGATATGGTC

Cucurbita sororia 20

GGTCTTATTCTTATTGTGCGCCTTGTGAGCGCGTTTGGATCCGCGAAGGCAATCGCTCGGATGTTCTCCTAACCCAACCC  
GGGAACAGACTGGAGGGAATCGCAGCATGGGGAATGTCCGCGTCTCGTTCGCAAGGCTCATTTTATAGTTGTGGGTGACTGCAATG  
GGAGTTTATCTGATCAAGGGCCGGGGCACAAGGGTCTGGTACTATCCAGGTGCGAAGAACCACGGGGGTGACTGCAATG  
AGCAGAAATCTCACTACCGGCCTAAACGACGAGCAAACTCGAACGTGAGAGCAAGGGATCACCCAAGGAATAGACGA  
GCTACAAGGAGGGAGGCAAGAACCATGCTTTTCAGAGACCTAACCCAACCAAC-----  
GGTAACGGTCCCGAATCAGATCTGAATTGCGAGAATAACTGACTACTAAGCCATCCCTATATATA----  
GGCTCATTCTCCAAACGGCACGGGGCCAAGCCTGACGGTCTTTTAAAGTAGATTGGGTGACAGATCGGCCATAGCAGTACT  
CCGGGATATAAACAGGGCAACAAATGTGAGCATAACGACCATGCCGCCGTTTTTCATTTTCGTGGAAGTCCCCGCCAGAG  
GAAAGAAAGGGCTGTAGGTGATGGCGCGTTCCGCTTCTTATCGTTCAGAGGGATGAATAAAGGCGGGCCGCTTCAACGGGA  
CCTATCCTCTCTCTTAATAGGCGGCAAAGCATAATAGGAAA-GGGGCCGAG-TGATTAGTG----  
CCTTTTTAGCCTTTTTCTAAAGACTCTCATGTGAAGCTAAGATGGCTCGCTACATAAAAAGTATAGCCAAAGAAAGATGAG  
ACGGGACAGACGGTTCAGAGGCCGAGCGGGACTACCATAGGAAAGCCCGCCCCCTCCCGCTAACATAGAAAGTGATTCCC  
GTAAC--TAGTGTCTCTATGTGAATCTCTTCCCGACCAGGCCGAATGAATCGGGTACCACCTTGGCGTGGG-  
AATGGCTCAGCCACATGCATCATTGATGAAAGCACTCCAGTCCAGTCCGCTCCTCGAAGTGGCTTGTCAACCACGCTT  
TCCCTCCCTCAAAACAATGCTCCTCACCAA-----CTTGGATTGGGG-----  
AATGAGTAGTTTCGCTCCAGGACTCCACCCCTCGAGAGC-----  
AGGATGCCGGCCGAGATGGAGCTGGAAGCCAACCGTCACTTTCTGGGGCTTGTCCCAACATCTAAATCAAATTGTTGGC  
AGGCTAGAAAAGGAACCAGCCAGCCTCTGAAATCAAGCTTTGCGTGGTATGCCCTGCCTATTCACTCGGACAATG--  
CTCTGAACACGAAAGTGTGCAGTTCTGCCCCCTTCTCCCATCCATGCTGAGTACAGGCAGCGCCTCGGAAAGCACGTAC  
GAGCCACATGCAGGGAACTTGCACGTGTGGTTCTGGCCGGGGACCCCGGTATACTGTACTAATATGTGTAGGTCCCCGT  
AATTCGAGTGAGATTGTCATGGCGCAAAGCAGATATGGTC

Cucurbita sororia 21

GGTCTTATTCTTATTGTGCGCCTTGTGAGCGCGTTTGGATCCGCGAAGGCAATCGCTCGGATGTTCTCCTAACCCAACCC  
GGGAACAGACTGGAGGGAATCGCAGCATGGGGAATGTCCGCGTCTCGTCGCAAGGCTCATTATAGTTGTGGGTCTATAGG  
GGAGTTTATCTGATCAAGGGCCGGGGCACAAGGGTCTCGTACTATCCAGGTGCGAAGAACCACGGGGGTGACTGCAATG  
AGCAGAAATCTCACTCACCAGCCTAAACGACGAGCAAACACTCGAACGTGAGAGCAAGGGATCACCCAAGGAATAGACGA  
GCTACAAGGAGGGGAGGCAAGAACCATGCTTTTCAGAGACCTAACCCAACCCAAC-----  
GGTAACGGTCCCGAATCTGATCTGAATTGCGAGAATAACTGACTACTAAGCCATCCCTATATATA----  
GGCTCATTCTCCAAACGGCAGGGGCCAAGCCTGACGGTCTTTAAGTAGATTGGGTGACAGATCGGCCATAGCAGTACT  
CCGGGATATAAACAGGGCAACAAATGTCGAGCATAACGACCATGCGGCCCGTCTTTTTCATTTTCGTGGAAGTCCCCGCCAGAG  
GAAAGAAAGGGCTGTAGGTGATGGCGCGTTCCGCTTCTTATCGTCAGAGGGATGAATAAAGGCGGGCCGCTTCAACGGGA  
CCTATCCTCTCTCTTAATAGGCGGCAAAGCATAAATAGGAAA-GGGGCCGAG-TGATTAGTG----  
CCTTTTTAGCCTTTTTCTAAAGACTCTCATGTGAAGCTAAGATGGCTCGCTACATAAAAAGTATAGCCAAAGAAAGATGAG  
ACGGGACAGACGGTCAAGGGCCGAGCGGGACTACCATAGGAAAGCCCCGCCCTCCCGCTAACATAGAAAGTGATTCCC  
GTAAC--TAGTGTCTCTATGTGAATCTCTTCCCGACCAGGCCGAATGAATCGGGTACCACCTTGGCGTGGG-  
AATGGCTCAGCCACATGCATCATTGATGAAAGCACTCCAGTCCAGTCCGCTCCTCGAAGTGGCTTGTCAACCACGCTT  
TCCCTCCCTCAAAACAATGCTCCTCACAAA-----CTTGGATTGGGG-----  
AATGAGTAGTTTCGCTCCAGGACTCCACCCCTCGAGAGC-----  
AGGATGCCGGCCGAGATGGAGCTGGAAGCCAACCGTCACTTTCTGGGGCTTGTCCCAACATCTAAATCAAATTGTTGGC  
AGGCTAGAAAAGGAACCAGCCCAGCCTCTGAAATCAAGCTTTGCGTGGTATGCCCTGCCTATTCACTCGGACAATG--  
CTCTGAACACGAAAGTGTGCAGTTCTGCCCCCTTCTCCCATCCATGCTGAGTCACAGGCAGCGCCTCGGAAAGCACGTAC  
GAGCCACATGCAGGGAAACTTGCACGTGTGGTTCTGGCCGGGGACCCCGGTATACTGTACTAATATGTGTAGGTCCCCGT  
AATTCGAGTGAGATTGTCATGGCGCAAAGCAGATATGGTC

Cucurbita sororia 22

GGTCTTATTCTTATTGTGCGCCTTGTGAGCGCGTTTGGATCCGCGAAGGCAATCGCTCGGATGTTCTCCTAACCCAACCC  
GGGAACAGACTGGAGGGAATCGCAGCATGGGGAATGTCCGCGTCTCGTCGCAAGGCTCATTTTTTTGTGGGTCTATAGG  
GGAGTTTATCTGATCAAGGGCCGGGGCACAAGGGTCTGGTACTATCCAGGTGCGAAGAACCACGGGGGTGACTGCAATG  
AGCAGAAATCTCACTCACCAGCCTAAACGACGAGCAAACACTCGAACGTGAGAGCAAGGGATCACCCAAGGAATAGACGA  
GCTACAAGGAGGGAGGCAAGAACCATGCTTTTCAGAGACCTAACCCAACCCAAC-----  
GGTAACGGTCCCGAATCTGATCTGAATTGCGAGAATAACTGACTACTAAGCCATGCCTATATATA----  
GGCTCATTCTCCAAACGGCAGGGGCCAAGCCTGACGGTCTTTAAGTAGATTGGGTGACAGATCGGCCATAGCAGTACT  
CCGGGATATAAACAGGGCAACAAATGTCGAGCATAACGACCATGCGGCCCGTCTTTTTCATTTTCGTGGAAGTCCCCGCCAGAG  
GAAAGAAAGGGCTGTAGGTGATGGCGCGTTCCGCTTCTTATCGTCAGAGGGATGAATAAAGGCGGGCCGCTTCAACGGGA  
CCTATTCTCTCTCTTAATAGGCGGCAAAGCAGAATAGGAAA-GGGGCCGAG-TGATTAGTG----  
CCTTTTTAGCCTTTTTCTAAAGACTCTCATGTGAAGCTAAGATGGCTCGCTACATAAAAAGTATACCCAAGAAAGATGAG  
ACGGGACAGACGGTCAAGGGCCGAGCGGGACTACCATAGGAAAGCCCCGCCCTCCCGCTAACATAGAAAGTGATTCCC  
GTAAC--TAGTGTCTCTATGTGAATCTCTTCCCGACCAGGCCGAATGAATCGGGTACCACCTTGGCGTGGG-  
AATGGCTCACCACATGCATCATTGATGAAAGCACTCCAGTCCAGTC-  
CCTCCTCGAAGTGGCTTGTCAACCACGCTTTCCCTCCCTCAAAACAATGCTCCTCACAAA-----  
CTTGGATTGGGG-----AATGAGTAGTTTCGCTCCAGGACTCCACCCCTCGAGAGC-----  
AGGATGCCGGCCGAGATGGAGCTGGAAGCCAACCGTCACTTTCTGGGGCTTGTCCCAACATCTAAATCAAATTGTTGGC  
AGGCTAGAAAAGGAACCAGCCCAGCCTCTGAAATCAAGCTTTGCGTGGTATGCCCTGCCTATTCACTCGGACAATG--  
CTCTGAACACGAAAGTGTGCAGTTCTGCCCCCTTCTCCCATCCATGCTGAGTCACAGGCAGCGCCTCGGAAAGCACGTAC  
GAGCCACATGCAGGGAAACTTGCACGTGTGGTTCTGGCCGGGGACCCCGGTATACTGTACTAATATGTGTAGGTCCCCGT  
AATTCGAGTGAGATTGTCATGGCGCAAAGCAGATATGGTC

Cucurbita argyrosperma 23

GGTCTTATTCTTATTGTGCGCCTTGTGAGCGCGTTTGGATCCGCGAAGGCAATCGCTCGGATGTTCTCCTAACCCAACCC  
GGGAACAGACTGGAGGGAATCGCAGCATGGGGAATGTCCGCGTCTCGTCGCAAGGCTCATTATAGTTGTGGGTCTATAGG  
GGAGTTTATCTGATCAAGGGCCGGGGCACAAGGGTCTGGTACTATCCAGGTGCGAAGAACCACGGGGGTGACTGCAATG  
AGCAGAAATCTCACTCACCAGCCTAAACGACGAGCAAACACTCGAACGTGAGAGCAAGGGATCACCCAAGGAATAGACGA  
GCTACAAGGAGGGGAGGCAAGAACCATGCTTTTCAGAGACCTAACCCAACCCAAC-----  
GGTAACGGTCCCGAATCAGATCTGAATTGCGAGAATAACTGACTACTAAGCCATCCCTATATATA----  
GGCTCATTCTCCAAACGGCAGGGGCCAAGCCTGACGGTCTTTAAGTAGATTGGGTGACAGATCGGCCATAGCAGTACT  
CCGGGATATAAACAGGGCAACAAATGTCGAGCATAACGACCATGCGGCCCGTCTTTTTCATTTTCGTGGAAGTCCCCGCCAGAG  
GAAAGAAAGGGCTGTAGGTGATGGCGCGTTCCGCTTCTTATCGTCAGAGGGATGAATAAAGGCGGGCCGCTTCAACGGGA  
CCTATCCTCTCTCTTAATAGGCGGCAAAGCATAAATAGGAAA-GGGGCCGAG-TGATTAGTG----  
CCTTTTTAGCCTTTTTCTAAAGACTCTCATGTGAAGCTAAGATGGCTCGCTACATAAAAAGTATAGCCAAAGAAAGATGAG  
ACGGGACAGACGGTCAAGGGCCGAGCGGGACTACCATAGGAAAGCCCCGCCCTCCCGCTAACATAGAAAGTGATTCCC  
GTAAC--TAGTGTCTCTATGTGAATCTCTTCCCGACCAGGCCGAATGAATCGGGTACCACCTTGGCGTGGG-  
AATGGCTCAGCCACATGCATCATTGATGAAAGCACTCCAGTCCAGTCCGCTCCTCGAAGTGGCTTGTCAACCACGCTT  
TCCCTCCCTCAAAACAATGCTCCTCACAAA-----CTTGGATTGGGG-----  
AATGAGTAGTTTCGCTCCAGGACTCCACCCCTCGAGAGC-----  
AGGATGCCGGCCGAGATGGAGCTGGAAGCCAACCGTCACTTTCTGGGGCTTGTCCCAACATCTAAATCAAATTGTTGGC  
AGGCTAGAAAAGGAACCAGCCCAGCCTCTGAAATCAAGCTTTGCGTGGTATGCCCTGCCTATTCACTCGGACAATG--  
CTCTGAACACGAAAGTGTGCAGTTCTGCCCCCTTCTCCCATCCATGCTGAGTCACAGGCAGCGCCTCGGAAAGCACGTAC



GAGCCACATGCAGGGAACTTGCACGTGTGGTTCTGGCCGGGGACCCCGGTATACTGTACTAATATGTGTAGGTCCCCGT  
AATTCGAGTGAGATTGTCATGGCGCAAAGCAGATATGGTC

*Cucurbita argyrosperma* 24

GGTCTTATTCTTATTGTGCGCCTTGTGAGCGCGTTTGGATCCGCGAAGGCAATCGCTCGGATGTTCTCCTAACCCAACCC  
GGGAACAGACTGGAGGGAATCGCAGCATGGGGAATGTCCGCGTCTCGTCGCAAGGCTCATTATATAGTTGTGGGTCTATAGG  
GGAGTTTATCTGATCAAGGGCCGGGGCACAAGGGTCTGGTACTATCCAGGTGCGAAGAACCACGGGGGTGACTGCAATG  
AGCAGAAATCTCACTCACCGGCCTAAACGACGAGCAAACACTCGAACGTGAGAGCAAGGGATCACCCAAGGAATAGACGA  
GCTACAAGGAGGGGAGGCAAGAACCATGCTTTTCAGAGACCTAACCCAACCCAAC-----  
GGTAACGGTCCCGAATCAGATCTGAATTGCGAGAATAACTGACTACTAAGCCATCCCTATATATA----  
GGCTCATTCTCCAAACGGCACGGGGCCAAGCCTGACGGTCTTTAAGTAGATTGGGTGACAGATCGGCCATAGCAGTACT  
CCGGGATATAAACAGGGCAACAAATGTGAGCATAACGACCATGCCGCCCGTTTTTCATTTTCGTGGAAGTCCCCGCCAGAG  
GAAAGAAAGGGCTGTAGGTGATGGCGCGTTCCGCTTCTTATCGTCAGAGGGATGAATAAAGGCGGGCCGCTTCAACGGGA  
CCTATCCTCTCTCTTAATAGGCGGCAAAGCATAATAGGAAA-GGGGCCGAG-TGATTAGTG----  
CCTTTTTAGCCTTTTTCTAAAGACTCTCATGTGAAGCTAAGATGGCTCGCTACATAAAAAGTATAGCCAAAGAAAGATGAG  
ACGGGACAGACGGTCAAGGGCCGACGCGGACTACCATAGGAAAGCCCGCCCCCTCCCGCTAACATAGAAAGTATTCCC  
GTAAC--TAGTGTCTCTATGTGAATCTTCCCCGACCAGGCGAATGAATCGGGTCAACCTGGCGTGGG-  
AATGGCTCAGCCACATGCATCATTGATGAAAGCACTCCAGTCCAGTCCGCTCCTCGAAGTGGCTTGTCAACCACGCTT  
TCCCTCCCTCAAACAATGCTCCTCACAAA-----CTTGGATTGGGG-----  
AATGAGTAGTTTCGCTCCAGGACTCCACCCCTCGAGAGC-----  
AGGATGCCGGCCGAGATGGAGCTGGAAGCCAACCGTCACTTTCTGGGGCTTGTCCCAACATCTAAATCAAATTGTTGGC  
AGGCTAGAAAAGGAACCGCCAGCCTCTGAAATCAAGCTTTGCGTGGTATGCCCTGCCTATTCACTCGGACAATG--  
CTCTGAACACGAAAGTGTGAGTTCTGCCCCCTTCTCCATCCATGCTGAGTACAGGCAGCGCCTCGGAAAGCACGTAC  
GAGCCACATGCAGGGAACTTGCACGTGTGGTTCTGGCCGGGGACCCCGGTATACTGTACTAATATGTGTAGGTCCCCGT  
AATTCGAGTGAGATTGTCATGGCGCAAAGCAGATATGGTC

*Cucurbita moschata* 25

GGTCTTATTCTTATTGTGCGCCTTGTGAGCGCGTTTGGATCCGCGAAGGCAATCGCTCGGATGTTCTCCTAACCCAACCC  
GGGAACAGACTGGAGGGAATCGCAGCATGGGGAATGTCCGCGTCTCGTCGCAAGGCTCATTATATAGTTGTGGGTCTATAGG  
GGAGTTTATCTGATCAAGGGCCGGGGCACAAGGGTCTGGTACTATCCAGGTGCGAAGAACCACGGGGGTGACTGCAATG  
AGCAGAAATCTCACTCACCGGCCTAAACGACGAGCAAACACTCGAACGTGAGAGCAAGGGATCACCCAAGGAATAGACGA  
GCTACAAGGAGGGGAGGCAAGAACCATGCTTTTCAGAGACCTAACCCAACCCAACCCAACGGTAACGGTCCCGAATCTTATC  
TGAATTGCGAGAATAACTGACTACTAAACCATCCCTATATATA----  
GGCTCATTCTCCAAACGGCACGGGGCCAAGCCTGACGGTCTTTAAGTAGATTGGGTGACAGATCGGCCATAGCAGTACT  
CCGGGATATAAACAGGGCAACAAATGTGAGCATAACGACCATGCCGCCCGTTTTTCATTTTCGTGGAAGTCCCCGCCAGAG  
GAAAGAAAGGGCTGTAGGTGATGGCGCGTTCCGCTTCTTATCGTCAGAGGGATGAATAAAGGCGGGCCGCTTCAACGGGA  
CCTATTCTCTCTCTTAATAGGCGGCAAGGCAGAATAGGAAA-GGGGCCGAG-TGATTAGTG----  
CCTTTTTAGCCTTTTTGATAAAGACTCTCATGTGAAGCTAACATGGCTCGCTACATAAAAAGTATAGCCAAAGAAAGATGAG  
ACGGGACAGACGGTCAAGGGCCGACGCGGACTACCATAGGAAAGCCCGCCCCCTCCCGCTAACATAGAAAGTATTCCC  
GTAAC--TAGTGTCTCTATGTTTCTCTTCCCGACCAGGCC----GAATCGGGTCAACCTGGCGTGGG-  
AATGGCTCAGCCACATGCATCATTGATGAAAGCACTCCAGTCCAGTCCGCTCCTCGAAGTGGCTTGTCAACCACGCTT  
TCCCTCCCTCAAACAATGCTCCTCACAAA-----CTTGGATTGGGTGGGG-----  
AATGAGTAGTTTCGCTCCAGGACTCCACCCCTCGAGAGC-----  
AGGATGCCGGCCGAGATGGAGCTGGAAGCCAACCGTCACTTTCTGGGGCTTGTCCCAACATCTAAATCAAATTGTTGGC  
AGGCTAGAAAAGGAACCGCCAGCCTCGGAAATCAAGCTTTGCGTGGTATGCCCTGCCTATTCACTCGGACAATG--  
CTCTGAACACGAAAGTGTGAGTTCTGCCCCCTTCTCCATCCATGCTGAGTACAGGCAGCGCCTCGGAAAGCACGTAC  
GAGCCACATGCAGGGAACTTGCACGTGTGGTTCTGGCCGGGGACCCCGGTATACTGTACTAATATGTGTAGGTCCCCGT  
AATTCGAGTGAGATTGTCATGGCGCAAAGCAGATATGGTC

*Cucurbita moschata* 26

GGTCTTATTCTTATTGTGCGCCTTGTGAGCGCGTTTGGATCCGCGAAGGCAATCGCTCGGATGTTCTCCTAACCCAACCC  
GGGAACAGACTGGAGGGAATCGCAGCATGGGGAATGTCCGCGTCTCGTCGCAAGGCTCATTATATAGTTGTGGGTCTATAGG  
GGAGTTTATCTGATCAAGGGCCGGGGCACAAGGGTCTGGTACTATCCAGGTGCGAAGAACCACGGGGGTGACTGCAATG  
AGCAGAAATCTCACTCACCGGCCTAAACGACGAGCAAACACTCGAACGTGAGAGCAAGGGATCACCCAAGGAATAGACGA  
GCTACAAGGAGGGGAGGCAAGAACCATGCTTTTCAGAGACCTAACCCAACCCAACCCAACGGTAACGGTCCCGAATCTTATC  
TGAATTGCGAGAATAACTGACTACTAAACCATCCCTATATATA----  
GGCTCATTCTCCAAACGGCACGGGGCCAAGCCTGACGGTCTTTAAGTAGATTGGGTGACAGATCGGCCATAGCAGTACT  
CCGGGATATAAACAGGGCAACAAATGTGAGCATAACGACCATGCCGCCCGTTTTTCATTTTCGTGGAAGTCCCCGCCAGAG  
GAAAGAAAGGGCTGTAGGTGATGGCGCGTTCCGCTTCTTATCGTCAGAGGGATGAATAAAGGCGGGCCGCTTCAACGGGA  
CCTATTCTCTCTCTTAATAGGCGGCAAGGCAGAATAGGAAA-GGGGCCGAG-TGATTAGTG----  
CCTTTTTAGCCTTTTTGATAAAGACTCTCATGTGAAGCTAACATGGCTCGCTACATAAAAAGTATAGCCAAAGAAAGATGAG  
ACGGGACAGACGGTCAAGGGCCGACGCGGACTACCATAGGAAAGCCCGCCCCCTCCCGCTAACATAGAAAGTATTCCC  
GTAAC--TAGTGTCTCTATGTTTCTCTTCCCGACCAGGCC----GAATCGGGTCAACCTGGCGTGGG-  
AATGGCTCAGCCACATGCATCATTGATGAAAGCACTCCAGTCCAGTCCGCTCCTCGAAGTGGCTTGTCAACCACGCTT  
TCCCTCCCTCAAACAATGCTCCTCACAAA-----CTTGGATTGGGTGGGG-----  
AATGAGTAGTTTCGCTCCAGGACTCCACCCCTCGAGAGC-----  
AGGATGCCGGCCGAGATGGAGCTGGAAGCCAACCGTCACTTTCTGGGGCTTGTCCCAACATCTAAATCAAATTGTTGGC

AGGCTAGAAAAGGAACCAGCCCAGCCTCGGAAATCAAGCTTTGCGTGGTATGCCCTGCCTATTCACTCGGACAATG--  
CTCTGAACACGAAAGTGTGCAGTTCTGCCCCCTTCTCCCATCCATGCTGAGTCACAGGCAGCGCCTCGGAAAGCACGTAC  
GAGCCACATGCAGGGAAACTTGCACGTGTGGTTCTGGCCGGGGACCCCGGTATACTGTACTAATATGTGTAGGTCCCCGT  
AATTCGAGTGAGATTGTCATGGCGCAAAGCAGATATGGTC

Cucurbita moschata 27

GGTCTTATTCTTATTGTGCGCCTTGTGAGCGCGTTTGGATCCGCGAAGGCAATCGCTCGGATGTTCTCCTAACCCAACCC  
GGGAACAGACTGGAGGGAATCGCAGCATGGGGAATGTCCGCGTCTCGTTCGCAAGGCTCATTATAGTTGTGGGTATAGG  
GGAGTTTATCTGATCAAGGGCCGGGGCACAAGGGTCTGGTACTATCCAGGTGCGAAGAACCACGGGGGTGACTGCAATG  
AGCAGAAATCTCACTACCGGCCTAAACGACGAGCAAACACTCGAACGTGAGAGCAAGGGATCACCCAAGGAATAGACGA  
GCTACAAGGAGGGAGGCAAGAACCATGCTTTTTCAGAGACCTAACCCAACCCAACCGGTAACGGTCCCGAATCTTATC  
TGAATTGCGAGAATAACTGACTACTAAACCATCCCTATATATA----

GGCTCATTCTCCAAACGGCACGGGGCCAAGCCTGACGGTTCTTTAAGTAGATTGGGTGACAGATCGGCCATAGCAGTACT  
CCGGGATATAAACAGGGCAACAAATGTTCGAGCATAACGACCATGCCGCCGTTTTTCATTTTCGTGGAAGTCCCCGCCAGAG  
GAAAGAAAGGGCTGTAGGTGATGGCGCGTTCCGCTTCTTATCGTTCAGAGGGATGAATAAAGGCGGGCCGCTTCAACGGGA  
CCTATTCTCTCTTAAATAGGCGGCAAGGCAGAATAGGAAA-GGGGCCGAG-TGATTAGTG----

CCTTTTTAGCCTTTTGGATAAAGACTCTCATGTGAAGCTAACATGGCTCGCTACATAAAAAGTATAGCCAAAGAAAGATGAG  
ACGGGACAGACGGTTCAGAGGCCGAGCGGGACTACCATAGGAAAGCCCGCCCCCTCCCGCTAACATAGAAAGTGATTCCC  
GTAAC--TAGTGTCTCTATGTTTCTCTTCCCGACCAGGCC----GAATCGGGTACCACCTTGGCGTGGG-  
AATGGCTCAGCCACATGCATCATTGATGAAAGCACTCCAGTCCAGTCCGCTCCTCGAAGTGGCTTGTCAACCACGCTT  
TCCCTCCCTCAAAACAATGCTCCTCACAAA-----CTTGGATTGGGTGGGG-----

AATGAGTAGTTCCGCTCCAGGACTCCACCCCTCGAGAGC-----

AGGATGCCGGCCGAGATGGAGCTGGAAGCCAACCGTCACTTTCTGGGGCTTGTCCCAACATCTAAATCAAATTGTTGGC  
AGGCTAGAAAAGGAACCAGCCCAGCCTCGGAAATCAAGCTTTGCGTGGTATGCCCTGCCTATTCACTCGGACAATG--  
CTCTGAACACGAAAGTGTGCAGTTCTGCCCCCTTCTCCCATCCATGCTGAGTCACAGGCAGCGCCTCGGAAAGCACGTAC  
GAGCCACATGCAGGGAAACTTGCACGTGTGGTTCTGGCCGGGGACCCCGGTATACTGTACTAATATGTGTAGGTCCCCGT  
AATTCGAGTGAGATTGTCATGGCGCAAAGCAGATATGGTC

Cucurbita moschata 28

GGTCTTATTCTTATTGTGCGCCTTGTGAGCGCGTTTGGATCCGCGAAGGCAATCGCTCGGATGTTCTCCTAACCCAACCC  
GGGAACAGACTGGAGGGAATCGCAGCATGGGGAATGTCCGCGTCTCGTTCGCAAGGCTCATTATAGTTGTGGGTATAGG  
GGAGTTTATCTGATCAAGGGCCGGGGCACAAGGGTCTGGTACTATCCAGGTGCGAAGAACCACGGGGGTGACTGCAATG  
AGCAGAAATCTCACTACCGGCCTAAACGACGAGCAAACACTCGAACGTGAGAGCAAGGGATCACCCAAGGAATAGACGA  
GCTACAAGGAGGGAGGCAAGAACCATGCTTTTTCAGAGACCTAACCCAACCCAACCGGTAACGGTCCCGAATCTTATC  
TGAATTGCGAGAATAACTGACTACTAAACCATCCCTATATATA----

GGCTCATTCTCCAAACGGCACGGGGCCAAGCCTGACGGTTCTTTAAGTAGATTGGGTGACAGATCGGCCATAGCAGTACT  
CCGGGATATAAACAGGGCAACAAATGTTCGAGCATAACGACCATGCCGCCGTTTTTCATTTTCGTGGAAGTCCCCGCCAGAG  
GAAAGAAAGGGCTGTAGGTGATGGCGCGTTCCGCTTCTTATCGTTCAGAGGGATGAATAAAGGCGGGCCGCTTCAACGGGA  
CCTATTCTCTCTTAAATAGGCGGCAAGGCAGAATAGGAAA-GGGGCCGAG-TGATTAGTG----

CCTTTTTAGCCTTTTGGATAAAGACTCTCATGTGAAGCTAACATGGCTCGCTACATAAAAAGTATAGCCAAAGAAAGATGAG  
ACGGGACAGACGGTTCAGAGGCCGAGCGGGACTACCATAGGAAAGCCCGCCCCCTCCCGCTAACATAGAAAGTGATTCCC  
GTAAC--TAGTGTCTCTATGTTTCTCTTCCCGACCAGGCC----GAATCGGGTACCACCTTGGCGTGGG-  
AATGGCTCAGCCACATGCATCATTGATGAAAGCACTCCAGTCCAGTCCGCTCCTCGAAGTGGCTTGTCAACCACGCTT  
TCCCTCCCTCAAAACAATGCTCCTCACAAA-----CTTGGATTGGGTGGGG-----

AATGAGTAGTTCCGCTCCAGGACTCCACCCCTCGAGAGC-----

AGGATGCCGGCCGAGATGGAGCTGGAAGCCAACCGTCACTTTCTGGGGCTTGTCCCAACATCTAAATCAAATTGTTGGC  
AGGCTAGAAAAGGAACCAGCCCAGCCTCGGAAATCAAGCTTTGCGTGGTATGCCCTGCCTATTCACTCGGACAATG--  
CTCTGAACACGAAAGTGTGCAGTTCTGCCCCCTTCTCCCATCCATGCTGAGTCACAGGCAGCGCCTCGGAAAGCACGTAC  
GAGCCACATGCAGGGAAACTTGCACGTGTGGTTCTGGCCGGGGACCCCGGTATACTGTACTAATATGTGTAGGTCCCCGT  
AATTCGAGTGAGATTGTCATGGCGCAAAGCAGATATGGTC

Cucurbita moschata 29

GGTCTTATTCTTATTGTGCGCCTTGTGAGCGCGTTTGGATCCGCGAAGGCAATCGCTCGGATGTTCTCCTAACCCAACCC  
GGGAACAGACTGGAGGGAATCGCAGCATGGGGAATGTCCGCGTCTCGTTCGCAAGGCTCATTATAGTTGTGGGTATAGG  
GGAGTTTATCTGATCAAGGGCCGGGGCACAAGGGTCTGGTACTATCCAGGTGCGAAGAACCACGGGGGTGACTGCAATG  
AGCAGAAATCTCACTACCGGCCTAAACGACGAGCAAACACTCGAACGTGAGAGCAAGGGATCACCCAAGGAATAGACGA  
GCTACAAGGAGGGAGGCAAGAACCATGCTTTTTCAGAGACCTAACCCAACCCAACCGGTAACGGTCCCGAATCTTATC  
TGAATTGCGAGAATAACTGACTACTAAACCATCCCTATATATA----

GGCTCATTCTCCAAACGGCACGGGGCCAAGCCTGACGGTTCTTTAAGTAGATTGGGTGACAGATCGGCCATAGCAGTACT  
CCGGGATATAAACAGGGCAACAAATGTTCGAGCATAACGACCATGCCGCCGTTTTTCATTTTCGTGGAAGTCCCCGCCAGAG  
GAAAGAAAGGGCTGTAGGTGATGGCGCGTTCCGCTTCTTATCGTTCAGAGGGATGAATAAAGGCGGGCCGCTTCAACGGGA  
CCTATTCTCTCTTAAATAGGCGGCAAGGCAGAATAGGAAA-GGGGCCGAG-TGATTAGTG----

CCTTTTTAGCCTTTTGGATAAAGACTCTCATGTGAAGCTAACATGGCTCGCTACATAAAAAGTATAGCCAAAGAAAGATGAG  
ACGGGACAGACGGTTCAGAGGCCGAGCGGGACTACCATAGGAAAGCCCGCCCCCTCCCGCTAACATAGAAAGTGATTCCC  
GTAAC--TAGTGTCTCTATGTTTCTCTTCCCGACCAGGCC----GAATCGGGTACCACCTTGGCGTGGG-  
AATGGCTCAGCCACATGCATCATTGATGAAAGCACTCCAGTCCAGTCCGCTCCTCGAAGTGGCTTGTCAACCACGCTT  
TCCCTCCCTCAAAACAATGCTCCTCACAAA-----CTTGGATTGGGTGGGG-----

AATGAGTAGTTTCGCTCCAGGACTCCACCCCTCGAGAGC-----  
AGGATGCCGGCCGAGATGGAGCTGGAAGCCAACCGTCACTTTCTGGGGCTTGTCCCAACATCTAAATCAAATTGTTGGC  
AGGCTAGAAAAGGAACCCAGCCAGCCTCGGAAATCAAGCTTTGCGTGGTATGCCCTGCCTATTCACTCGGACAATG--  
CTCTGAACACGAAAGTGTGCAGTTCTGCCCCCTTCTCCATCCATGCTGAGTACAGGCAGCGCCTCGGAAAGCACGTAC  
GAGCCACATGCAGGGAAACTTGCACGTGTGGTTCTGGCCGGGGACCCCGGTATACTGTACTAATATGTGTAGGTCCCCGT  
AATTCGAGTGAGATTGTCATGGCGCAAAGCAGATATGGTC

Cucurbita moschata 30

GGTCTTATTCTTATTGTGCGCCTTGTGAGCGCGTTTTGGATCCGCGAAGGCAATCGCTCGGATGTTCTCCTAACCCAACCC  
GGGAACAGACTGGAGGGAATCGCAGCATGGGGAATGTCCGCGTCTCGTCGCAAGGCTCATTTATAGTTGTGGGTCTATAGG  
GGAGTTTATCTGATCAAGGGCCGGGGCACAAGGGTCTGGTACTATCCAGGTGCGAAGAACCACGGGGGTGACTGCAATG  
AGCAGAAATCTCACTCACCGGCCTAAACGACGAGCAAACACTCGAACGTGAGAGCAAGGGATCACCCAAGGAATAGACGA  
GCTACAAGGAGGGAGGCAAGAACCATGCTTTTCAGAGACCTAACCCAACCCAAC-----  
GGTAACGGTCCCGAATCTTATCTGAATTGCGAGAATAACTGACTACTAAACCATCCCTATATATA-----  
GGCTCATTCTCCAAACGGCACGGGGCCAAGCCTGACGGTTCTTTAAGTAGATTGGGTGACAGATCGGCCATAGCAGTACT  
CCGGGATATAAACAGGGCAACAAATGTCGAGCATAACGACCATGCCGCCGTTTTTCATTTCTGTGGAAGTCCCCGCCAGAG  
GAAAGAAAGGGCTGTAGGTGATGGCGCGTTCCGCTTCTTATCGTCAGAGGGATGAATAAAGGCGGGCCGCTTCAACGGGA  
CCTATTCTCTCTTTAATAGGCGGCAAGGCAGAATAGGAAA-GGGGCCGAG-TGATTAGTG-----  
CCTTTTTAGCCTTTTGTATAAAGACTCTCATGTGAAGCTAACATGGCTCGCTACATAAAAAGTATAGCCAAAGAAAGATGAG  
ACGGGACAGACGGTCAAGGGCCGAGCGGGACTACCATAGGAAAGCCCCCCCCCTCCCGCTAACATAGAAAGTGATTCCC  
GTAAC--TAGTGTCTCTATGTTTCATCTCTTCCCGACCAGGCC----GAATCGGGTCAACACTTGGCGTGGG--  
AATGGCTCAGCCACATGCATCATTGATGAAAGCACTCCAGTCCAGTCCGCTCCTCGAAGTGGCTTGTCAACCACGCTT  
TCCCTCCCTCAAACAATGCTCCTCACAAA-----CTTGGATTGGGTGGG-----

AATGAGTAGTTTCGCTCCAGGACTCCACCCCTCGAGAGC-----

AGGATGCCGGCCGAGATGGAGCTGGAAGCCAACCGTCACTTTCTGGGGCTTGTCCCAACATCTAAATCAAATTGTTGGC  
AGGCTAGAAAAGGAACCCAGCCAGCCTCGGAAATCAAGCTTTGCGTGGTATGCCCTGCCTATTCACTCGGACAATG--  
CTCTGAACACGAAAGTGTGCAGTTCTGCCCCCTTCTCCATCCATGCTGAGTACAGGCAGCGCCTCGGAAAGCACGTAC  
GAGCCACATGCAGGGAAACTTGCACGTGTGGTTCTGGCCGGGGACCCCGGTATACTGTACTAATATGTGTAGGTCCCCGT  
AATTCGAGTGAGATTGTCATGGCGCAAAGCAGATATGGTC

Cucurbita moschata 31

GGTCTTATTCTTATTGTGCGCCTTGTGAGCGCGTTTTGGATCCGCGAAGGCAATCGCTCGGATGTTCTCCTAACCCAACCC  
GGGAACAGACTGGAGGGAATCGCAGCATGGGGAATGTCCGCGTCTCGTCGCAAGGCTCATTTATAGTTGTGGGTCTATAGG  
GGAGTTTATCTGATCAAGGGCCGGGGCACAAGGGTCTGGTACTATCCAGGTGCGAAGAACCACGGGGGTGACTGCAATG  
AGCAGAAATCTCACTCACCGGCCTAAACGACGAGCAAACACTCGAACGTGAGAGCAAGGGATCACCCAAGGAATAGACGA  
GCTACAAGGAGGGAGGCAAGAACCATGCTTTTCAGAGACCTAACCCAACCCAAC-----  
GGTAACGGTCCCGAATCTTATCTGAATTGCGAGAATAACTGACTACTAAACCATCCCTATATATA-----  
GGCTCATTCTCCAAACGGCACGGGGCCAAGCCTGACGGTTCTTTAAGTAGATTGGGTGACAGATCGGCCATAGCAGTACT  
CCGGGATATAAACAGGGCAACAAATGTCGAGCATAACGACCATGCCGCCGTTTTTCATTTCTGTGGAAGTCCCCGCCAGAG  
GAAAGAAAGGGCTGTAGGTGATGGCGCGTTCCGCTTCTTATCGTCAGAGGGATGAATAAAGGCGGGCCGCTTCAACGGGA  
CCTATTCTCTCTTTAATAGGCGGCAAGGCAGAATAGGAAA-GGGGCCGAG-TGATTAGTG-----  
CCTTTTTAGCCTTTTGTATAAAGACTCTCATGTGAAGCTAACATGGCTCGCTACATAAAAAGTATAGCCAAAGAAAGATGAG  
ACGGGACAGACGGTCAAGGGCCGAGCGGGACTACCATAGGAAAGCCCCCCCCCTCCCGCTAACATAGAAAGTGATTCCC  
GTAAC--TAGTGTCTCTATGTTTCATCTCTTCCCGACCAGGCC----GAATCGGGTCAACACTTGGCGTGGG--  
AATGGCTCAGCCACATGCATCATTGATGAAAGCACTCCAGTCCAGTCCGCTCCTCGAAGTGGCTTGTCAACCACGCTT  
TCCCTCCCTCAAACAATGCTCCTCACAAA-----CTTGGATTGGGTGGG-----

AATGAGTAGTTTCGCTCCAGGACTCCACCCCTCGAGAGC-----

AGGATGCCGGCCGAGATGGAGCTGGAAGCCAACCGTCACTTTCTGGGGCTTGTCCCAACATCTAAATCAAATTGTTGGC  
AGGCTAGAAAAGGAACCCAGCCAGCCTCGGAAATCAAGCTTTGCGTGGTATGCCCTGCCTATTCACTCGGACAATG--  
CTCTGAACACGAAAGTGTGCAGTTCTGCCCCCTTCTCCATCCATGCTGAGTACAGGCAGCGCCTCGGAAAGCACGTAC  
GAGCCACATGCAGGGAAACTTGCACGTGTGGTTCTGGCCGGGGACCCCGGTATACTGTACTAATATGTGTAGGTCCCCGT  
AATTCGAGTGAGATTGTCATGGCGCAAAGCAGATATGGTC

Cucurbita moschata 32

GGTCTTATTCTTATTGTGCGCCTTGTGAGCGCGTTTTGGATCCGCGAAGGCAATCGCTCGGATGTTCTCCTAACCCAACCC  
GGGAACAGACTGGAGGGAATCGCAGCATGGGGAATGTCCGCGTCTCGTCGCAAGGCTCATTTATAGTTGTGGGTCTATAGG  
GGAGTTTATCTGATCAAGGGCCGGGGCACAAGGGTCTGGTACTATCCAGGTGCGAAGAACCACGGGGGTGACTGCAATG  
AGCAGAAATCTCACTCACCGGCCTAAACGACGAGCAAACACTCGAACGTGAGAGCAAGGGATCACCCAAGGAATAGACGA  
GCTACAAGGAGGGAGGCAAGAACCATGCTTTTCAGAGACCTAACCCAACCCAAC-----  
GGTAACGGTCCCGAATCTTATCTGAATTGCGAGAATAACTGACTACTAAACCATCCCTATATATA-----  
GGCTCATTCTCCAAACGGCACGGGGCCAAGCCTGACGGTTCTTTAAGTAGATTGGGTGACAGATCGGCCATAGCAGTACT  
CCGGGATATAAACAGGGCAACAAATGTCGAGCATAACGACCATGCCGCCGTTTTTCATTTCTGTGGAAGTCCCCGCCAGAG  
GAAAGAAAGGGCTGTAGGTGATGGCGCGTTCCGCTTCTTATCGTCAGAGGGATGAATAAAGGCGGGCCGCTTCAACGGGA  
CCTATTCTCTCTTTAATAGGCGGCAAGGCAGAATAGGAAA-GGGGCCGAG-TGATTAGTG-----  
CCTTTTTAGCCTTTTGTATAAAGACTCTCATGTGAAGCTAACATGGCTCGCTACATAAAAAGTATAGCCAAAGAAAGATGAG  
ACGGGACAGACGGTCAAGGGCCGAGCGGGACTACCATAGGAAAGCCCCCCCCCTCCCGCTAACATAGAAAGTGATTCCC  
GTAAC--TAGTGTCTCTATGTTTCATCTCTTCCCGACCAGGCC----GAATCGGGTCAACACTTGGCGTGGG--

AATGGCTCAGCCACATGCATCATTTTGTGAAAGCACTCCAGTCCAGTCCGCTCCTCGAAGTGGCTTGTCAACCACGCTT  
TCCCTCCCTCAAAACAATGCTCCTCACCAA-----CTTGGATTGGGTGGGG-----  
AATGAGTAGTTTCGCTCCAGGACTCCACCCCTCGAGAGC-----  
AGGATGCCGGCCGAGATGGAGCTGGAAGCCAACCGTCACTTTCTGGGGCTTGTCCCAACATCTAAATCAAATTGTTGGC  
AGGCTAGAAAAGGAACCAGCCAGCCTCGGAAATCAAGCTTTGCGTGGTATGCCCTGCCTATTTACTCGGACAATG--  
CTCTGAACACGAAAGTGTGCAGTTCTGCCCCCTTCTCCCATCCATGCTGAGTACAGGCAGCGCCTCGGAAAGCACGTAC  
GAGCCACATGCAGGGAACTTGCACGTGTGGTTCTGGCCGGGGACCCCGGTATACTGTACTAATATGTGTAGGTCCCCGT  
AATTCGAGTGAGATTGTTCATGGCGCAAAGCAGATATGGTC

Cucurbita moschata 33

GGTCTTATTCTTATTGTGCGCCTTGTGAGCGCGTTTGGATCCGCGAAGGCAATCGCTCGGATGTTCTCCTAACCCAACCC  
GGGAACAGACTGGAGGGAATCGCAGCATGGGGAATGTCCGCGTCTCGTTCGCAAGGCTCATTTATAGTTGTGGGTGATAGG  
GGAGTTTATCTGATCAAGGGCCGGGGCACAAGGGTCTGGTACTATCCAGGTGCGAAGAACCACGGGGGTGACTGCAATG  
AGCAGAAATCTCACTCACCGCCTAAACGACGAGCAAACACTCGAACGTGAGAGCAAGGGATCACCCAAGGAATAGACGA  
GCTACAAGGAGGGGAGGCAAGAACCATGCTTTTCAGAGACCTAACCCAACCCAAC-----  
GGTAACGGTCCCGAATCTTATCTGAATTGCGAGAATAACTGACTACTAAACCATCCCTATATATA----  
GGCTCATTCTCCAAACGGCACGGGGCCAAGCCTGACGGTCTTTAAGTAGATTGGGTGACAGATCGGCCATAGCAGTACT  
CCGGGATATAAACAGGGCAACAAATGTTCGAGCATAACGACCATGCCGCCGTTTTTCATTTTCGTGGAAGTCCCCGCCAGAG  
GAAAGAAAGGGCTGTAGGTGATGGCGCGTTCCGCTTCTTATCGTCAGAGGGATGAATAAAGGCGGGCCGCTTCAACGGGA  
CCTATTCTCTCTTAAATAGGCGGCAAGGCAGAATAGGAAA-GGGGCCGAG-TGATTAGTG-----  
CCTTTTTAGCCTTTTGATAAAGACTCTCATGTGAAGCTAACATGGCTCGCTACATAAAAAGTATAGCCAAAGAAAGATGAG  
ACGGGACAGACGGTTCAGAGGCCGACGCGGGACTACCATAGGAAAGCCCGCCCCCTCCCGCTAACATAGAAAGTATTCCC  
GTAAC--TAGTGTCTCTATGTTTCATCTTTCCCGACCAGGCC----GAATCGGGTCAACACTTGGCGTGGG-  
AATGGCTCAGCCACATGCATCATTTTGTGAAAGCACTCCAGTCCAGTCCGCTCCTCGAAGTGGCTTGTCAACCACGCTT  
TCCCTCCCTCAAAACAATGCTCCTCACCAA-----CTTGGATTGGGTGGGG-----  
AATGAGTAGTTTCGCTCCAGGACTCCACCCCTCGAGAGC-----  
AGGATGCCGGCCGAGATGGAGCTGGAAGCCAACCGTCACTTTCTGGGGCTTGTCCCAACATCTAAATCAAATTGTTGGC  
AGGCTAGAAAAGGAACCAGCCAGCCTCGGAAATCAAGCTTTGCGTGGTATGCCCTGCCTATTTACTCGGACAATG--  
CTCTGAACACGAAAGTGTGCAGTTCTGCCCCCTTCTCCCATCCATGCTGAGTACAGGCAGCGCCTCGGAAAGCACGTAC  
GAGCCACATGCAGGGAACTTGCACGTGTGGTTCTGGCCGGGGACCCCGGTATACTGTACTAATATGTGTAGGTCCCCGT  
AATTCGAGTGAGATTGTTCATGGCGCAAAGCAGATATGGTC

Cucurbita moschata 34

TCTTATTCTTATTGTGCGCCTTGTGAGCGCGTTTGGATCCGCGAAGGCAATCGCTCGGATGTTCTCCTAACCCAACCCGG  
GAACAGACTGGAGGGAATCGCAGCATGGGGAATGTCCGCGTCTCGTTCGCAAGGCTCATTTATAGTTGTGGGTGATAGGGG  
AGTTTATCTGATCAAGGGCCGGGGCACAAGGGTCTGGTACTATCCAGGTGCGAAGAACCACGGGGGTGACTGCAATGAG  
CAGAAATCTCACTCACCGCCTAAACGACGAGCAAACACTCGAACGTGAGAGCAAGGGATCACCCAAGGAATAGACGAGC  
TACAAGGAGGGGAGGCAAGAACCATGCTTTTCAGAGACCTAACCCAACCCAAC-----  
GGTAACGGTCCCGAATCTTATCTGAATTGCGAGAATAACTGACTACTAAACCATCCCTATATATA----  
GGCTCATTCTCCAAACGGCACGGGGCCAAGCCTGACGGTCTTTAAGTAGATTGGGTGACAGATCGGCCATAGCAGTACT  
CCGGGATATAAACAGGGCAACAAATGTTCGAGCATAACGACCATGCCGCCGTTTTTCATTTTCGTGGAAGTCCCCGCCAGAG  
GAAAGAAAGGGCTGTAGGTGATGGCGCGTTCCGCTTCTTATCGTCAGAGGGATGAATAAAGGCGGGCCGCTTCAACGGGA  
CCTATTCTCTCTTAAATAGGCGGCAAGGCAGAATAGGAAA-GGGGCCGAG-TGATTAGTG-----  
CCTTTTTAGCCTTTTGATAAAGACTCTCATGTGAAGCTAACATGGCTCGCTACATAAAAAGTATAGCCAAAGAAAGATGAG  
ACGGGACAGACGGTTCAGAGGCCGACGCGGGACTACCATAGGAAAGCCCGCCCCCTCCCGCTAACATAGAAAGTATTCCC  
GTAAC--TAGTGTCTCTATGTTTCATCTTTCCCGACCAGGCC----GAATCGGGTCAACACTTGGCGTGGG-  
AATGGCTCAGCCACATGCATCATTTTGTGAAAGCACTCCAGTCCAGTCCGCTCCTCGAAGTGGCTTGTCAACCACGCTT  
TCCCTCCCTCAAAACAATGCTCCTCACCAA-----CTTGGATTGGGTGGGG-----  
AATGAGTAGTTTCGCTCCAGGACTCCACCCCTCGAGAGC-----  
AGGATGCCGGCCGAGATGGAGCTGGAAGCCAACCGTCACTTTCTGGGGCTTGTCCCAACATCTAAATCAAATTGTTGGC  
AGGCTAGAAAAGGAACCAGCCAGCCTCGGAAATCAAGCTTTGCGTGGTATGCCCTGCCTATTTACTCGGACAATG--  
CTCTGAACACGAAAGTGTGCAGTTCTGCCCCCTTCTCCCATCCATGCTGAGTACAGGCAGCGCCTCGGAAAGCACGTAC  
GAGCCACATGCAGGGAACTTGCACGTGTGGTTCTGGCCGGGGACCCCGGTATACTGTACTAATATGTGTAGGTCCCCGT  
AATTCGAGTGAGATTGTTCATGGCGCAAAGCAGATATGGTC

Cucurbita moschata 35

GGTCTTATTCTTATTGTGCGCCTTGTGAGCGCGTTTGGATCCGCGAAGGCAATCGCTCGGATGTTCTCCTAACCCAACCC  
GGGAACAGACTGGAGGGAATCGCAGCATGGGGAATGTCCGCGTCTCGTTCGCAAGGCTCATTTATAGTTGTGGGTGATAGG  
GGAGTTTATCTGATCAAGGGCCGGGGCACAAGGGTCTGGTACTATCCAGGTGCGAAGAACCACGGGGGTGACTGCAATG  
AGCAGAAATCTCACTCACCGCCTAAACGACGAGCAAACACTCGAACGTGAGAGCAAGGGATCACCCAAGGAATAGACGA  
GCTACAAGGAGGGGAGGCAAGAACCATGCTTTTCAGAGACCTAACCCAACCCAAC-----  
GGTAACGGTCCCGAATCTTATCTGAATTGCGAGAATAACTGACTACTAAACCATCCCTATATATA----  
GGCTCATTCTCCAAACGGCACGGGGCCAAGCCTGACGGTCTTTAAGTAGATTGGGTGACAGATCGGCCATAGCAGTACT  
CCGGGATATAAACAGGGCAACAAATGTTCGAGCATAACGACCATGCCGCCGTTTTTCATTTTCGTGGAAGTCCCCGCCAGAG  
GAAAGAAAGGGCTGTAGGTGATGGCGCGTTCCGCTTCTTATCGTCAGAGGGATGAATAAAGGCGGGCCGCTTCAACGGGA  
CCTATTCTCTCTTAAATAGGCGGCAAGGCAGAATAGGAAA-GGGGCCGAG-TGATTAGTG-----  
CCTTTTTAGCCTTTTGATAAAGACTCTCATGTGAAGCTAACATGGCTCGCTACATAAAAAGTATAGCCAAAGAAAGATGAG

ACGGGACAGACGGTTCAGAGGCCGAGCGGGACTACCATAGGAAAGCCCGCCCCCTCCCGCTAACATAGAAAGTGATTCCC  
GTAAC--TAGTGTCTCTATGTTTCATCTCTTCCCGACCAGGCC----GAATCGGGTCACCACTTGGCGTGGG-  
AATGGCTCAGCCACATGCATCATTGATGAAAGCACTCCAGTCCAGTCCGCTCCTCGAAGTGGCTTGTCAACCACGCTT  
TCCCTCCCTCAAAACAATGCTCCTCACCAA-----CTTGGATTGGGTGGG-----  
AATGAGTAGTTTCGCTCCAGGACTCCACCCCTCGAGAGC-----  
AGGATGCCGGCCGAGATGGAGCTGGAAGCCAACCGTCACTTTCTGGGGCTTGTCCCAACATCTAAATCAAATTGTTGGC  
AGGCTAGAAAAGGAACCAGCCAGCCTCGGAAATCAAGCTTTGCGTGGTATGCCCTGCCTATTCACTCGGACAATG--  
CTCTGAACACGAAAGTGTGCAGTTCTGCCCCCTTCTCCCATCCATGCTGAGTACAGGCAGCGCCTCGGAAAGCACGTAC  
GAGCCACATGCAGGGAAACTTGCACGTGTGGTTCTGGCCGGGGACCCCGGTATACTGTACTAATATGTGTAGGTCCCCGT  
AATTCGAGTGAGATTGTCATGGCGCAAAGCAGATATGGTC

Cucurbita moschata 36

GGTCTTATTCTTATTGTGCGCCTTGTGAGCGCGTTTGGATCCGCGAAGGCAATCGCTCGGATGTTCTCCTAACCCAACCC  
GGGAACAGACTGGAGGGAATCGCAGCATGGGGAATGTCCGCGTCTCGTTCGCAAGGCTCATTATAGTTGTGGGTTCATAGG  
GGAGTTTATCTGATCAAGGGCCGGGGCACAAGGGTCTGGTACTATCCAGGTGCGAAGAACCACGGGGGTGACTGCAATG  
AGCAGAAATCTCACTCACCAGCCTAAACGACGAGCAAACACTCGAACGTGAGAGCAAGGGATCACCCAAGGAATAGACGA  
GCTACAAGGAGGGAGGCAAGAACCATGCTTTCAGAGACCTAACCCAACCCAAC-----  
GGTAACGGTCCCGAATCTTATCTGAATTGCGAGAATAACTGACTACTAAACCATCCCTATATATA----  
GGCTCATTCTCCAAACGGCACGGGGCCAAGCCTGACGGTTCTTTAAGTAGATTGGGTGACAGATCGGCCATAGCAGTACT  
CCGGGATATAAACAGGGCAACAAATGTGAGCATAACGACCATGCCGCCGTTTTTCATTTCTGGAAGTCCCCGCCAGAG  
GAAAGAAAGGGCTGTAGGTGATGGCGCGTTCCGCTTCTTATCGTTCAGAGGGATGAATAAAGGCGGGCCGCTTCAACGGGA  
CCTATTCTCTCTTAAATAGGCGGCAAGGCAGAATAGGAAA-GGGGCCGAG-TGATTAGTG----  
CCTTTTTAGCCTTTTGTATAAAGACTCTCATGTGAAGCTAACATGGCTCGCTACATAAAAAGTATAGCCAAAGAAAGATGAG  
ACGGGACAGACGGTTCAGAGGCCGAGCGGGACTACCATAGGAAAGCCCGCCCCCTCCCGCTAACATAGAAAGTGATTCCC  
GTAAC--TAGTGTCTCTATGTTTCATCTCTTCCCGACCAGGCC----GAATCGGGTCACCACTTGGCGTGGG-  
AATGGCTCAGCCACATGCATCATTGATGAAAGCACTCCAGTCCAGTCCGCTCCTCGAAGTGGCTTGTCAACCACGCTT  
TCCCTCCCTCAAAACAATGCTCCTCACCAA-----CTTGGATTGGGTGGG-----  
AATGAGTAGTTTCGCTCCAGGACTCCACCCCTCGAGAGC-----  
AGGATGCCGGCCGAGATGGAGCTGGAAGCCAACCGTCACTTTCTGGGGCTTGTCCCAACATCTAAATCAAATTGTTGGC  
AGGCTAGAAAAGGAACCAGCCAGCCTCGGAAATCAAGCTTTGCGTGGTATGCCCTGCCTATTCACTCGGACAATG--  
CTCTGAACACGAAAGTGTGCAGTTCTGCCCCCTTCTCCCATCCATGCTGAGTACAGGCAGCGCCTCGGAAAGCACGTAC  
GAGCCACATGCAGGGAAACTTGCACGTGTGGTTCTGGCCGGGGACCCCGGTATACTGTACTAATATGTGTAGGTCCCCGT  
AATTCGAGTGAGATTGTCATGGCGCAAAGCAGATATGGTC

Cucurbita moschata 37

GGTCTTATTCTTATTGTGCGCCTTGTGAGCGCGTTTGGATCCGCGAAGGCAATCGCTCGGATGTTCTCCTAACCCAACCC  
GGGAACAGACTGGAGGGAATCGCAGCATGGGGAATGTCCGCGTCTCGTTCGCAAGGCTCATTATAGTTGTGGGTTCATAGG  
GGAGTTTATCTGATCAAGGGCCGGGGCACAAGGGTCTGGTACTATCCAGGTGCGAAGAACCACGGGGGTGACTGCAATG  
AGCAGAAATCTCACTCACCAGCCTAAACGACGAGCAAACACTCGAACGTGAGAGCAAGGGATCACCCAAGGAATAGACGA  
GCTACAAGGAGGGAGGCAAGAACCATGCTTTCAGAGACCTAACCCAACCCAAC-----  
GGTAACGGTCCCGAATCTTATCTGAATTGCGAGAATAACTGACTACTAAACCATCCCTATATATA----  
GGCTCATTCTCCAAACGGCACGGGGCCAAGCCTGACGGTTCTTTAAGTAGATTGGGTGACAGATCGGCCATAGCAGTACT  
CCGGGATATAAACAGGGCAACAAATGTGAGCATAACGACCATGCCGCCGTTTTTCATTTCTGGAAGTCCCCGCCAGAG  
GAAAGAAAGGGCTGTAGGTGATGGCGCGTTCCGCTTCTTATCGTTCAGAGGGATGAATAAAGGCGGGCCGCTTCAACGGGA  
CCTATTCTCTCTTAAATAGGCGGCAAGGCAGAATAGGAAA-GGGGCCGAG-TGATTAGTG----  
CCTTTTTAGCCTTTTGTATAAAGACTCTCATGTGAAGCTAACATGGCTCGCTACATAAAAAGTATAGCCAAAGAAAGATGAG  
ACGGGACAGACGGTTCAGAGGCCGAGCGGGACTACCATAGGAAAGCCCGCCCCCTCCCGCTAACATAGAAAGTGATTCCC  
GTAAC--TAGTGTCTCTATGTTTCATCTCTTCCCGACCAGGCC----GAATCGGGTCACCACTTGGCGTGGG-  
AATGGCTCAGCCACATGCATCATTGATGAAAGCACTCCAGTCCAGTCCGCTCCTCGAAGTGGCTTGTCAACCACGCTT  
TCCCTCCCTCAAAACAATGCTCCTCACCAA-----CTTGGATTGGGTGGG-----  
AATGAGTAGTTTCGCTCCAGGACTCCACCCCTCGAGAGC-----  
AGGATGCCGGCCGAGATGGAGCTGGAAGCCAACCGTCACTTTCTGGGGCTTGTCCCAACATCTAAATCAAATTGTTGGC  
AGGCTAGAAAAGGAACCAGCCAGCCTCGGAAATCAAGCTTTGCGTGGTATGCCCTGCCTATTCACTCGGACAATG--  
CTCTGAACACGAAAGTGTGCAGTTCTGCCCCCTTCTCCCATCCATGCTGAGTACAGGCAGCGCCTCGGAAAGCACGTAC  
GAGCCACATGCAGGGAAACTTGCACGTGTGGTTCTGGCCGGGGACCCCGGTATACTGTACTAATATGTGTAGGTCCCCGT  
AATTCGAGTGAGATTGTCATGGCGCAAAGCAGATATGGTC

Cucurbita moschata 38

GGTCTTATTCTTATTGTGCGCCTTGTGAGCGCGTTTGGATCCGCGAAGGCAATCGCTCGGATGTTCTCCTAACCCAACCC  
GGGAACAGACTGGAGGGAATCGCAGCATGGGGAATGTCCGCGTCTCGTTCGCAAGGCTCATTATAGTTGTGGGTTCATAGG  
GGAGTTTATCTGATCAAGGGCCGGGGCACAAGGGTCTGGTACTATCCAGGTGCGAAGAACCACGGGGGTGACTGCAATG  
AGCAGAAATCTCACTCACCAGCCTAAACGACGAGCAAACACTCGAACGTGAGAGCAAGGGATCACCCAAGGAATAGACGA  
GCTACAAGGAGGGAGGCAAGAACCATGCTTTCAGAGACCTAACCCAACCCAAC-----  
GGTAACGGTCCCGAATCTTATCTGAATTGCGAGAATAACTGACTACTAAACCATCCCTATATATA----  
GGCTCATTCTCCAAACGGCACGGGGCCAAGCCTGACGGTTCTTTAAGTAGATTGGGTGACAGATCGGCCATAGCAGTACT  
CCGGGATATAAACAGGGCAACAAATGTGAGCATAACGACCATGCCGCCGTTTTTCATTTCTGGAAGTCCCCGCCAGAG  
GAAAGAAAGGGCTGTAGGTGATGGCGCGTTCCGCTTCTTATCGTTCAGAGGGATGAATAAAGGCGGGCCGCTTCAACGGGA

CCTATTCTCTCTCTTAATAGGCGGCAAGGCAGAATAGGAAA-GGGGCCGAG-TGATTAGTG----  
CCTTTTTAGCCTTTTATGATAAAGACTCTCATGTGAAGCTAACATGGCTCGCTACATAAAAAGTATAGCCAAAGAAAGATGAG  
ACGGGACAGACGGTCAGAGGCCGCGAGCGGGACTACCATAGGAAAGCCCGCCCCCTCCCGCTAACATAGAAAGTGATTCCC  
GTAAC--TAGTGTCTCTATGTTTCATCTTTCCCGACCAGGCC----GAATCGGGTCACCACCTTGGCGTGGG-  
AATGGCTCAGCCACATGCATCATTGTATGAAAGCACTCCAGTCCAGTCCGCTCCTCGAAGTGGCTTGTCAACCACGCTT  
TCCCTCCCTCAAAACAATGCTCCTCACCAA-----CTTGGATTGGGTGGGG-----  
AATGAGTAGTTTCGCTCCAGGACTCCACCCCTCGAGAGC-----  
AGGATGCCGGCCGAGATGGAGCTGGAAGCCAACCGTCACTTTCTGGGGCTTGTCCCAACATCTAAATCAAATTGTTGGC  
AGGCTAGAAAAGGAACCAGCCCAGCCTCGGAAATCAAGCTTTGCGTGGTATGCCCTGCCTATTCACTCGGACAATG--  
CTCTGAACACGAAAGTGTGCAGTTCTGCCCCCTTCTCCCATCCATGCTGAGTCACAGGCAGCGCCTCGGAAAGCACGTAC  
GAGCCACATGCAGGAAACTTGCACGTGTGGTTCTGGCCGGGGACCCCGGTATACTGTACTAATATGTGTAGGTCCCCGT  
AATTCGAGTGAGATTGTTCATGGCGCAAAGCAGATATGGTC

Cucurbita moschata 39

GGTCTTATTCTTATTGTGCGCCTTGTGAGCGCGTTTTGGATCCGCGAAGGCAATCGCTCGGATGTTCTCCTAACCCAACCC  
GGGAACAGACTGGAGGGAATCGCAGCATGGGGAATGTCCGCGTCTCGTCGCAAGGCTCATTATAGTTGTGGGTTCATAGG  
GGAGTTTATCTGATCAAGGGCCGGGGCACAAGGGTCTGGTACTATCCAGGTGCGAAGAACCACGGGGGTGACTGCAATG  
AGCAGAAATCTCACTACCGGCCTAAACGACGAGCAAACACTCGAAGCTGAGAGCAAGGGATCACCCAAGGAATAGACGA  
GCTACAAGGAGGGAGGCAAGAACCATGCTTTCAGAGACCTAACCCAACCCAAC-----  
GGTAACGGTCCCGAATCTTATCTGAATTGCGAGAATAACTGACTACTAAACCATCCCTATATATA----  
GGCTCATTCTCCAAACGGCACGGGGCCAAGCCTGACGGTCTTTAAGTAGATTGGGTGACAGATCGGCCATAGCAGTACT  
CCGGGATATAAACCAGGGCAACAATGTGCGAGCATAACGACCATGCCGCCCGTTTTTCATTTTCGTGGAAGTCCCCGCCAGAG  
GAAAGAAAGGGCTGTAGGTGATGGCGGTTCCGCTTCTTATCGTCAGAGGGATGAATAAAGGCGGGCCGCTTCAACGGGA  
CCTATTCTCTCTCTTAATAGGCGGCAAGGCAGAATAGGAAA-GGGGCCGAG-TGATTAGTG----  
CCTTTTTAGCCTTTTATGATAAAGACTCTCATGTGAAGCTAACATGGCTCGCTACATAAAAAGTATAGCCAAAGAAAGATGAG  
ACGGGACAGACGGTCAGAGGCCGCGAGCGGGACTACCATAGGAAAGCCCGCCCCCTCCCGCTAACATAGAAAGTGATTCCC  
GTAAC--TAGTGTCTCTATGTTTCATCTTTCCCGACCAGGCC----GAATCGGGTCACCACCTTGGCGTGGG-  
AATGGCTCAGCCACATGCATCATTGTGAAAGCACTCCAGTCCAGTCCGCTCCTCGAAGTGGCTTGTCAACCACGCTT  
TCCCTCCCTCAAAACAATGCTCCTCACCAA-----CTTGGATTGGGTGGGG-----  
AATGAGTAGTTTCGCTCCAGGACTCCACCCCTCGAGAGC-----  
AGGATGCCGGCCGAGATGGAGCTGGAAGCCAACCGTCACTTTCTGGGGCTTGTCCCAACATCTAAATCAAATTGTTGGC  
AGGCTAGAAAAGGAACCAGCCCAGCCTCGGAAATCAAGCTTTGCGTGGTATGCCCTGCCTATTCACTCGGACAATG--  
CTCTGAACACGAAAGTGTGCAGTTCTGCCCCCTTCTCCCATCCATGCTGAGTCACAGGCAGCGCCTCGGAAAGCACGTAC  
GAGCCACATGCAGGAAACTTGCACGTGTGGTTCTGGCCGGGGACCCCGGTATACTGTACTAATATGTGTAGGTCCCCGT  
AATTCGAGTGAGATTGTTCATGGCGCAAAGCAGATATGGTC

Cucurbita moschata 40

GGTCTTATTCTTATTGTGCGCCTTGTGAGCGCGTTTTGGATCCGCGAAGGCAATCGCTCGGATGTTCTCCTAACCCAACCC  
GGGAACAGACTGGAGGGAATCGCAGCATGGGGAATGTCCGCGTCTCGTCGCAAGGCTCATTATAGTTGTGGGTTCATAGG  
GGAGTTTATCTGATCAAGGGCCGGGGCACAAGGGTCTGGTACTATCCAGGTGCGAAGAACCACGGGGGTGACTGCAATG  
AGCAGAAATCTCACTACCGGCCTAAACGACGAGCAAACACTCGAAGCTGAGAGCAAGGGATCACCCAAGGAATAGACGA  
GCTACAAGGAGGGAGGCAAGAACCATGCTTTCAGAGACCTAACCCAACCCAAC-----  
GGTAACGGTCCCGAATCTTATCTGAATTGCGAGAATAACTGACTACTAAACCATCCCTATATATA----  
GGCTCATTCTCCAAACGGCACGGGGCCAAGCCTGACGGTCTTTAAGTAGATTGGGTGACAGATCGGCCATAGCAGTACT  
CCGGGATATAAACCAGGGCAACAATGTGCGAGCATAACGACCATGCCGCCCGTTTTTCATTTTCGTGGAAGTCCCCGCCAGAG  
GAAAGAAAGGGCTGTAGGTGATGGCGGTTCCGCTTCTTATCGTCAGAGGGATGAATAAAGGCGGGCCGCTTCAACGGGA  
CCTATTCTCTCTCTTAATAGGCGGCAAGGCAGAATAGGAAA-GGGGCCGAG-TGATTAGTG----  
CCTTTTTAGCCTTTTATGATAAAGACTCTCATGTGAAGCTAACATGGCTCGCTACATAAAAAGTATAGCCAAAGAAAGATGAG  
ACGGGACAGACGGTCAGAGGCCGCGAGCGGGACTACCATAGGAAAGCCCGCCCCCTCCCGCTAACATAGAAAGTGATTCCC  
GTAAC--TAGTGTCTCTATGTTTCATCTTTCCCGACCAGGCC----GAATCGGGTCACCACCTTGGCGTGGG-  
AATGGCTCAGCCACATGCATCATTGTGAAAGCACTCCAGTCCAGTCCGCTCCTCGAAGTGGCTTGTCAACCACGCTT  
TCCCTCCCTCAAAACAATGCTCCTCACCAA-----CTTGGATTGGGTGGGG-----  
AATGAGTAGTTTCGCTCCAGGACTCCACCCCTCGAGAGC-----  
AGGATGCCGGCCGAGATGGAGCTGGAAGCCAACCGTCACTTTCTGGGGCTTGTCCCAACATCTAAATCAAATTGTTGGC  
AGGCTAGAAAAGGAACCAGCCCAGCCTCGGAAATCAAGCTTTGCGTGGTATGCCCTGCCTATTCACTCGGACAATG--  
CTCTGAACACGAAAGTGTGCAGTTCTGCCCCCTTCTCCCATCCATGCTGAGTCACAGGCAGCGCCTCGGAAAGCACGTAC  
GAGCCACATGCAGGAAACTTGCACGTGTGGTTCTGGCCGGGGACCCCGGTATACTGTACTAATATGTGTAGGTCCCCGT  
AATTCGAGTGAGATTGTTCATGGCGCAAAGCAGATATGGTC

Cucurbita moschata 41

GGTCTTATTCTTATTGTGCGCCTTGTGAGCGCGTTTTGGATCCGCGAAGGCAATCGCTCGGATGTTCTCCTAACCCAACCC  
GGGAACAGACTGGAGGGAATCGCAGCATGGGGAATGTCCGCGTCTCGTCGCAAGGCTCATTATAGTTGTGGGTTCATAGG  
GGAGTTTATCTGATCAAGGGCCGGGGCACAAGGGTCTGGTACTATCCAGGTGCGAAGAACCACGGGGGTGACTGCAATG  
AGCAGAAATCTCACTACCGGCCTAAACGACGAGCAAACACTCGAAGCTGAGAGCAAGGGATCACCCAAGGAATAGACGA  
GCTACAAGGAGGGAGGCAAGAACCATGCTTTCAGAGACCTAACCCAACCCAAC-----  
GGTAACGGTCCCGAATCTTATCTGAATTGCGAGAATAACTGACTACTAAACCATCCCTATATATA----  
GGCTCATTCTCCAAACGGCACGGGGCCAAGCCTGACGGTCTTTAAGTAGATTGGGTGACAGATCGGCCATAGCAGTACT

CCGGGATATAAACAGGGCAACAAATGTCGAGCATAACGACCATGCCGCCGTTTTTCATTTTCGTGGAAGTCCCCGCCAGAG  
GAAAGAAAGGGCTGTAGGTGATGGCGCGTTCCGCTTCTTATCGTCAGAGGGATGAATAAAGGCGGGCCGCTTCAACGGGA  
CCTATTCTCTCTCTTAATAGGCGGCAAGGCAGAATAGGAAA-GGGGCCGAG-TGATTAGTG----  
CCTTTTTAGCCTTTTTCTAAAGACTCTCATGTGAAGCTAACATGGCTCGTACATAAAAGTATAGCCAAAGAAAGATGAG  
ACGGGACAGACGGTTCAGAGGCCGAGCGGGACTACCATAGGAAAGCCCCCCCCCTCCCGCTAACATAGAAAGTGATTCCC  
GTAAC--TAGTGTCTCTATGTTTCATCTCTTCCCGACCAGGCC----GAATCGGGTACCACCTTGGCGTGGG-  
AATGGCTCAGCCACATGCATCATTGATGAAAGCACTCCAGTCCAGTCCGCTCCTCGAAGTGGCTTGTCAACCACGCTT  
TCCCTCCCTCAAAACAATGCTCCTCACCAAA-----CTTGGATTGGGTGGG-----  
AATGAGTAGTTTCGCTCCAGGACTCCACCCCTCGAGAGC-----

Cucurbita pepo subsp.pepo 42

GGTCTTATTCTTATTGTGCGCCTTGTGAGCGCGTTTTGGATCCGCGAAGGCAATCGCTCGGATGTTCTCCTAACCCAACCC  
GGGAACAGACTGGAGGGAATCGCAGCATGGGGAATGTCCGCGTCTCGTCGCAAGGCTCATTTTTTGTTGTGGGTGATAGG  
GGAGTTTATCTGATCAAGGGCCGGGGCACAAGGGTCTGGTACTATCCAGGTGCGAAGAACCACGGGGGTGACTGCAATG  
AGCAGAAATCTCACTCACCAGCCTAAACGACGAGCAAACTCGAACGTGAGAGCAAGGGATCACCCAAGGAATAGACGA  
GCTACAAGGAGGGGAGGCAAGAACCATGCTTTTCAGAGACCTAACCCAACCCAAC-----  
GGTAACGGTCCCGAATCTTATCTGAATTGCGAGAATAACTGACTACTAAGCCATGCCTATATATA----  
GGCTCATTCTCCAAACGGCACGGGGCAAGCCTGACGGTCTTTAAAGTAGATTGGGTGACAGATCGGCCATAGCAGTACT  
CCGGGATATAAACAGGGCAACAAATGTCGAGCATAACGACGATGCCGCCGTTTTTCATTTTCGTGGAAGTCCCCGCCAGAG  
GAAAGAAAGGGCTGTAGGTGATGGCGCGTTCCGCTTCTTATCGTCAGAGGGATGAATAAAGGCGGGCCGCTTCAACGGGA  
CCTATTCTCTCTCTTAATAGGCGGCAAGCAGAATAGGAAA-GGGGCCGAG-TGATTAGTG----  
CCTTTTTAGCCTTTTTCTAAAGACTCTCATGTGAAGCTAACATGGCTCGCTACATAAAAGTATAGCCAAAGAAAGATGAG  
ACGGGACAGACGGTTCAGAGGCCGAGCGGGACTACCATAGGAAAGCCCCCCCCCTCCCGCTAACATAGAAAGTGATTCCC  
GTAAC--TAGTGTCTCTATGTGAATCTCTTCCCGACCAGGCC----GAATCGGGTACCACCTTGGCGTGGG-  
AATGGCTCAGCCACATGCATCATTGATGAAAGCACTCCAGTCCAGTCCGCTCCTCGAAGTGGCTTGTCAACCACGCTT  
TCCCTCCCTCAAAACAATGCTCCTCACCAAA-----CTTGGATTGGG-----  
AATGAGTAGTTTCGCTCCAGGACTCCACCCCTCGAGAGC-----  
AGGATGCCGGCCGAGATGGAGCTGGAAGCCAACCGTCACTTTCTGGGGCTTGTCCCAACATCTAAATCAAATTGTTGGC  
AGGCTAGAAAAGGAACCGCCAGCCTCAGAAATCAAGCTTTGCGTGGTATGCCCTGCCTATTCACTCGGACAATG--  
CTCTGAACACGAAAGTGTGAGTTCTGCCCCCTTCTCCATCCATGCTGAGTACAGGCAGCGCCTCGGAAAGCACGTAC  
GAGCCACATGCAGGGAAACTTGCACGTGTGGTTCTGGCCGGGGACCCCGGTATACTGTACTAATATGTGTAGGTCCCCGT  
AATTCGAGTGAGATTGTTCATGGCGCAAAGCAGATATGGTC

Cucurbita pepo subsp.pepo 43

GGTCTTATTCTTATTGTGCGCCTTGTGAGCGCGTTTTGGATCCGCGAAGGCAATCGCTCGGATGTTCTCCTAACCCAACCC  
GGGAACAGACTGGAGGGAATCGCAGCATGGGGAATGTCCGCGTCTCGTCGCAAGGCTCATTTTTTGTTGTGGGTGATAGG  
GGAGTTTATCTGATCAAGGGCCGGGGCACAAGGGTCTGGTACTATCCAGGTGCGAAGAACCACGGGGGTGACTGCAATG  
AGCAGAAATCTCACTCACCAGCCTAAACGACGAGCAAACTCGAACGTGAGAGCAAGGGATCACCCAAGGAATAGACGA  
GCTACAAGGAGGGGAGGCAAGAACCATGCTTTTCAGAGACCTAACCCAACCCAAC-----  
GGTAACGGTCCCGAATCTTATCTGAATTGCGAGAATAACTGACTACTAAGCCATGCCTATATATA----  
GGCTCATTCTCCAAACGGCACGGGGCAAGCCTGACGGTCTTTAAAGTAGATTGGGTGACAGATCGGCCATAGCAGTACT  
CCGGGATATAAACAGGGCAACAAATGTCGAGCATAACGACGATGCCGCCGTTTTTCATTTTCGTGGAAGTCCCCGCCAGAG  
GAAAGAAAGGGCTGTAGGTGATGGCGCGTTCCGCTTCTTATCGTCAGAGGGATGAATAAAGGCGGGCCGCTTCAACGGGA  
CCTATTCTCTCTCTTAATAGGCGGCAAGCAGAATAGGAAA-GGGGCCGAG-TGATTAGTG----  
CCTTTTTAGCCTTTTTCTAAAGACTCTCATGTGAAGCTAACATGGCTCGCTACATAAAAGTATAGCCAAAGAAAGATGAG  
ACGGGACAGACGGTTCAGAGGCCGAGCGGGACTACCATAGGAAAGCCCCCCCCCTCCCGCTAACATAGAAAGTGATTCCC  
GTAAC--TAGTGTCTCTATGTGAATCTCTTCCCGACCAGGCC----GAATCGGGTACCACCTTGGCGTGGG-  
AATGGCTCAGCCACATGCATCATTGATGAAAGCACTCCAGTCCAGTCCGCTCCTCGAAGTGGCTTGTCAACCACGCTT  
TCCCTCCCTCAAAACAATGCTCCTCACCAAA-----CTTGGATTGGG-----  
AATGAGTAGTTTCGCTCCAGGACTCCACCCCTCGAGAGC-----  
AGGATGCCGGCCGAGATGGAGCTGGAAGCCAACCGTCACTTTCTGGGGCTTGTCCCAACATCTAAATCAAATTGTTGGC  
AGGCTAGAAAAGGAACCGCCAGCCTCAGAAATCAAGCTTTGCGTGGTATGCCCTGCCTATTCACTCGGACAATG--  
CTCTGAACACGAAAGTGTGAGTTCTGCCCCCTTCTCCATCCATGCTGAGTACAGGCAGCGCCTCGGAAAGCACGTAC  
GAGCCACATGCAGGGAAACTTGCACGTGTGGTTCTGGCCGGGGACCCCGGTATACTGTACTAATATGTGTAGGTCCCCGT  
AATTCGAGTGAGATTGTTCATGGCGCAAAGCAGATATGGTC

Cucurbita pepo subsp.pepo 44

GGTCTTATTCTTATTGTGCGCCTTGTGAGCGCGTTTTGGATCCGCGAAGGCAATCGCTCGGATGTTCTCCTAACCCAACCC  
GGGAACAGACTGGAGGGAATCGCAGCATGGGGAATGTCCGCGTCTCGTCGCAAGGCTCATTTTTTGTTGTGGGTGATAGG  
GGAGTTTATCTGATCAAGGGCCGGGGCACAAGGGTCTGGTACTATCCAGGTGCGAAGAACCACGGGGGTGACTGCAATG  
AGCAGAAATCTCACTCACCAGCCTAAACGACGAGCAAACTCGAACGTGAGAGCAAGGGATCACCCAAGGAATAGACGA  
GCTACAAGGAGGGGAGGCAAGAACCATGCTTTTCAGAGACCTAACCCAACCCAAC-----

GGTAACGGTCCCGAATCTTATCTGAATTGCGAGAATAACTGACTACTAAGCCATGCCTATATATA----  
GGCTCATTCTCCAAACGGCACGGGGCCAAGCCTGACGGTCTTTAAGTAGATTGGGTGACAGATCGGCCATAGCAGTACT  
CCGGGATATAAACAGGGCAACAAATGTCGAGCATAACGACGATGCCGCCCGTTTTTCATTTTCGTGGAAGTCCCCGCCAGAG  
GAAAGAAAGGGCTGTAGGTGATGGCGCGTTCCGCTTCTTATCGTCAGAGGGATGAATAAAGGCGGGCCGCTTCAACGGGA  
CCTATTCTCTCTTAAATAGGCGGCAAAGCAGAATAGGAAA-GGGGCCGAG-TGATTAGTG----  
CCTTTTTAGCCTTTTTCTAAAGACTCTCATGTGAAGCTAACATGGCTCGCTACATAAAAAGTATAGCCAAAGAAAGATGAG  
ACGGGACAGACGGTCAGAGGCCGACGCGGGACTACCATAGGAAAGCCCCCCCCCTCCCGCTAACATAGAAAGTGATTCCC  
GTAAC--TAGTGTCTCTATGTGAATCTCTTCCCGACCAGGCC----GAATCGGGTCACCACTTGGCGTGGG-  
AATGGCTCAGCCACATGCATCATTGATGAAAGCACTCCAGTCCAGTCCGCTCCTCGAAGTGGCTTGTCAACCACGCTT  
TCCCTCCCTCAAAACAATGCTCCTCACAAA-----CTTGGATTGGGG-----  
AATGAGTAGTTTCGCTCCAGGACTCCACCCCTCGAGAGC-----  
AGGATGCCGGCCGAGATGGAGCTGGAAGCCAACCGTCACTTTCTGGGGCTTGTCCCAACATCTAAATCAAATTGTTGGC  
AGGCTAGAAAAGGAACCAGCCAGCCTCAGAAATCAAGCTTTGCGTGGTATGCCCTGCCTATTCACTCGGACAATG--  
CTCTGAACACGAAAGTGTGCAGTTCTGCCCCCTTCTCCCATCCATGCTGAGTCACAGGCAGCGCCTCGGAAAGCACGTAC  
GAGCCACATGCAGGGAAACTTGCACGTGTGGTTCTGGCCGGGGACCCCGGTATACTGTACTAATATGTGTAGGTCCCCGT  
AATTCGAGTGAGATTGTCATGGCGCAAAGCAGATATGGTC

Cucurbita pepo subsp.pepo 45

GGTCTTATTCTTATTGTGCGCCTTGTGAGCGCGTTTGGATCCGCGAAGGCAATCGCTCGGATGTTCTCCTAACCCAACCC  
GGGAACAGACTGGAGGGAATCGCAGCATGGGGAATGTCCGCGTCTCGTCGCAAGGCTCATTTTTTGTTGTGGGTGATAGG  
GGAGTTTATCTGATCAAGGGCCGGGGCACAAGGGTCTGGTACTATCCAGGTGCGAAGAACCACGGGGGTGACTGCAATG  
AGCAGAAATCTCACTCACCAGCCTAAACGACGAGCAAACACTCGAACGTGAGAGCAAGGGATCACCCAAGGAATAGACGA  
GCTACAAGGAGGGAGGCAAGAACCATGCTTTTTCAGAGACTAACCCAACCCAAC-----  
GGTAACGGTCCCGAATCTTATCTGAATTGCGAGAATAACTGACTACTAAGCCATGCCTATATATA----  
GGCTCATTCTCCAAACGGCACGGGGCCAAGCCTGACGGTCTTTAAGTAGATTGGGTGACAGATCGGCCATAGCAGTACT  
CCGGGATATAAACAGGGCAACAAATGTCGAGCATAACGACGATGCCGCCCGTTTTTCATTTTCGTGGAAGTCCCCGCCAGAG  
GAAAGAAAGGGCTGTAGGTGATGGCGCGTTCCGCTTCTTATCGTCAGAGGGATGAATAAAGGCGGGCCGCTTCAACGGGA  
CCTATTCTCTCTTAAATAGGCGGCAAAGCAGAATAGGAAA-GGGGCCGAG-TGATTAGTG----  
CCTTTTTAGCCTTTTTCTAAAGACTCTCATGTGAAGCTAACATGGCTCGCTACATAAAAAGTATAGCCAAAGAAAGATGAG  
ACGGGACAGACGGTCAGAGGCCGACGCGGGACTACCATAGGAAAGCCCCCCCCCTCCCGCTAACATAGAAAGTGATTCCC  
GTAAC--TAGTGTCTCTATGTGAATCTCTTCCCGACCAGGCC----GAATCGGGTCACCACTTGGCGTGGG-  
AATGGCTCAGCCACATGCATCATTGATGAAAGCACTCCAGTCCAGTCCGCTCCTCGAAGTGGCTTGTCAACCACGCTT  
TCCCTCCCTCAAAACAATGCTCCTCACAAA-----CTTGGATTGGGG-----  
AATGAGTAGTTTCGCTCCAGGACTCCACCCCTCGAGAGC-----  
AGGATGCCGGCCGAGATGGAGCTGGAAGCCAACCGTCACTTTCTGGGGCTTGTCCCAACATCTAAATCAAATTGTTGGC  
AGGCTAGAAAAGGAACCAGCCAGCCTCAGAAATCAAGCTTTGCGTGGTATGCCCTGCCTATTCACTCGGACAATG--  
CTCTGAACACGAAAGTGTGCAGTTCTGCCCCCTTCTCCCATCCATGCTGAGTCACAGGCAGCGCCTCGGAAAGCACGTAC  
GAGCCACATGCAGGGAAACTTGCACGTGTGGTTCTGGCCGGGGACCCCGGTATACTGTACTAATATGTGTAGGTCCCCGT  
AATTCGAGTGAGATTGTCATGGCGCAAAGCAGATATGGTC

Cucurbita pepo subsp.pepo 46

GGTCTTATTCTTATTGTGCGCCTTGTGAGCGCGTTTGGATCCGCGAAGGCAATCGCTCGGATGTTCTCCTAACCCAACCC  
GGGAACAGACTGGAGGGAATCGCAGCATGGGGAATGTCCGCGTCTCGTCGCAAGGCTCATTTTTTGTTGTGGGTGATAGG  
GGAGTTTATCTGATCAAGGGCCGGGGCACAAGGGTCTGGTACTATCCAGGTGCGAAGAACCACGGGGGTGACTGCAATG  
AGCAGAAATCTCACTCACCAGCCTAAACGACGAGCAAACACTCGAACGTGAGAGCAAGGGATCACCCAAGGAATAGACGA  
GCTACAAGGAGGGAGGCAAGAACCATGCTTTTTCAGAGACTAACCCAACCCAAC-----  
GGTAACGGTCCCGAATCTTATCTGAATTGCGAGAATAACTGACTACTAAGCCATGCCTATATATA----  
GGCTCATTCTCCAAACGGCACGGGGCCAAGCCTGACGGTCTTTAAGTAGATTGGGTGACAGATCGGCCATAGCAGTACT  
CCGGGATATAAACAGGGCAACAAATGTCGAGCATAACGACGATGCCGCCCGTTTTTCATTTTCGTGGAAGTCCCCGCCAGAG  
GAAAGAAAGGGCTGTAGGTGATGGCGCGTTCCGCTTCTTATCGTCAGAGGGATGAATAAAGGCGGGCCGCTTCAACGGGA  
CCTATTCTCTCTTAAATAGGCGGCAAAGCAGAATAGGAAA-GGGGCCGAG-TGATTAGTG----  
CCTTTTTAGCCTTTTTCTAAAGACTCTCATGTGAAGCTAACATGGCTCGCTACATAAAAAGTATAGCCAAAGAAAGATGAG  
ACGGGACAGACGGTCAGAGGCCGACGCGGGACTACCATAGGAAAGCCCCCCCCCTCCCGCTAACATAGAAAGTGATTCCC  
GTAAC--TAGTGTCTCTATGTGAATCTCTTCCCGACCAGGCC----GAATCGGGTCACCACTTGGCGTGGG-  
AATGGCTCAGCCACATGCATCATTGATGAAAGCACTCCAGTCCAGTCCGCTCCTCGAAGTGGCTTGTCAACCACGCTT  
TCCCTCCCTCAAAACAATGCTCCTCACAAA-----CTTGGATTGGGG-----  
AATGAGTAGTTTCGCTCCAGGACTCCACCCCTCGAGAGC-----  
AGGATGCCGGCCGAGATGGAGCTGGAAGCCAACCGTCACTTTCTGGGGCTTGTCCCAACATCTAAATCAAATTGTTGGC  
AGGCTAGAAAAGGAACCAGCCAGCCTCAGAAATCAAGCTTTGCGTGGTATGCCCTGCCTATTCACTCGGACAATG--  
CTCTGAACACGAAAGTGTGCAGTTCTGCCCCCTTCTCCCATCCATGCTGAGTCACAGGCAGCGCCTCGGAAAGCACGTAC  
GAGCCACATGCAGGGAAACTTGCACGTGTGGTTCTGGCCGGGGACCCCGGTATACTGTACTAATATGTGTAGGTCCCCGT  
AATTCGAGTGAGATTGTCATGGCGCAAAGCAGATATGGTC

Cucurbita pepo subsp.fraterna 47

GGTCTTATTCTTATTGTGCGCCTTGTGAGCGCGTTTGGATCCGCGAAGGCAATCGCTCGGATGTTCTCCTAACCCAACCC  
GGGAACAGACTGGAGGGAATCGCAGCATGGGGAATGTCCGCGTCTCGTCGCAAGGCTCATTTTTTGTTGTGGGTGATAGG  
GGAGTTTATCTGATCAAGGGCCGGGGCACAAGGGTCTGGTACTATCCAGGTGCGAAGAACCACGGGGGTGACTGCAATG



AGCAGAAATCTCACTCACCGCCTAAACGACGAGCAAACACTCGAACGTGAGAGCAAGGGATCACCCAAGGAATAGACGA  
GCTACAAGGAGGGGAGGCAAGAACCATGCTTTTCAGAGACCTAACCCAACCCAAC-----  
GGTAACGGTCCCGAATCTTATCTGAATTGCGAGAATAACTGACTACTAAGCCATGCCTATATATA----  
GGCTCATTCTCCAAACGGCACGGGGCCAAGCCTTTAGGTTCTTTAAGTAGATTGGGTGACAGATCGGCCATAGCAGTACT  
CCGGGATATAAAACAGGGCAACAAATGTGAGCATAACGACGATGCCGCCCGTTTTTCATTTTCGTGGAAGTCCCCGCCAGAG  
GAAAGAAAGGGCTGTAGGTGATGGCGCGTTCCGCTTCTTATCGTCAGAGGGATGAATAAAGGCGGGCCGCTTCAACGGGA  
CCTATTCTCTCTCTTAATAGGCGGCAAAGCAGAATAGGAAA-GGGGCCGAG-TGATTAGTG----  
CCTTTTTAGCCTTTTTCTAAAGACTCTCATGTGAAGCTAACATGGCTCGCTACATAAAAAGTATAGCCAAAGAAAGATGAG  
ACGGGACAGACGGTCAGAGGCCGACGCGGGACTACCATAGGAAAGCCCCCCCCCTCCCGCTAACATAGAAAGTGATTCCC  
GTAAC--TAGTGTCTCTATGTGAATCTCTTCCCGACCAGGCC----GAATCGGGTCACCACTTGGCGTGGG-  
AATGGCTCAGCCACATGCATCATTTGATGAAAGCACTCCAGTCCAGTCCGCTCCTCGAAGTGGCTTGTCAACCACGCTT  
TCCCTCCCTCAAACAATGCTCCTCACCAA-----CTTGGATTGGGG-----  
AATGAGTAGTTTCGCTCCAGGACTCCACCCCTCGAGAGC-----  
AGGATGCCGGCCGAGATGGAGCTGGAAGCCAACCGTCACTTTCTGGGGCTTGTCCCAACATCTAAATCAAATTGTTGGC  
AGGCTAGAAAAGGAACCGCCAGCCTCAGAAATCAAGCTTTGCGTGGTATGCCCTGCCTATTCACTCGGACAATG--  
CTCTGAACACGAAAGTGTGCAGTTCTGCCCCCTTCTCCCATCCATGCTGAGTCACAGGCAGCGCCTCGGAAAGCACGTAC  
GAGCCACATGCAGGGAAACTTGCACGTGTGGTTCTGGCCGGGGACCCCGGTATACTGTACTAATATGTGTAGGTCCCCGT  
AATTCGAGTGAGATTGTCATGGCGCAAAGCAGATATGGTC

*Cucurbita pepo* subsp. *fraterna* 48

GGTCTTATTCTTATTGTGCGCCTTGTGAGCGCGTTTTGGATCCGCGAAGGCAATCGCTCGGATGTTCTCCTAACCCAACCC  
GGGAACAGACTGGAGGGAATCGCAGCATGGGGAATGTCCGCGTCTCGTCGCAAGGCTCATTTTTTGTGTGGGTGATAGG  
GGAGTTTATCTGATCAAGGGCCGGGGCACAAGGGTCTGGTACTATCCAGGTGCGAAGAACCACGGGGGTGACTGCAATG  
AGCAGAAATCTCACTACCCGGCCTAAACGACGAGCAAACACTCGAACGTGAGAGCAAGGGATCACCCAAGGAATAGACGA  
GCTACAAGGAGGGAGGCAAGAACCATGCTTTTCAGAGACCTAACCCAACCCAAC-----  
GGTAACGGTCCCGAATCTTATCTGAATTGCGAGAATAACTGACTACTAAGCCATGCCTATATATA----  
GGCTCATTCTCCAAACGGCACGGGGCCAAGCCTTTAGGTTCTTTAAGTAGATTGGGTGACAGATCGGCCATAGCAGTACT  
CCGGGATATAAAACAGGGCAACAAATGTGAGCATAACGACGATGCCGCCCGTTTTTCATTTTCGTGGAAGTCCCCGCCAGAG  
GAAAGAAAGGGCTGTAGGTGATGGCGCGTTCCGCTTCTTATCGTCAGAGGGATGAATAAAGGCGGGCCGCTTCAACGGGA  
CCTATTCTCTCTCTTAATAGGCGGCAAAGCAGAATAGGAAA-GGGGCCGAG-TGATTAGTG----  
CCTTTTTAGCCTTTTTCTAAAGACTCTCATGTGAAGCTAACATGGCTCGCTACATAAAAAGTATAGCCAAAGAAAGATGAG  
ACGGGACAGACGGTCAGAGGCCGACGCGGGACTACCATAGGAAAGCCCCCCCCCTCCCGCTAACATAGAAAGTGATTCCC  
GTAAC--TAGTGTCTCTATGTGAATCTCTTCCCGACCAGGCC----GAATCGGGTCACCACTTGGCGTGGG-  
AATGGCTCAGCCACATGCATCATTTGATGAAAGCACTCCAGTCCAGTCCGCTCCTCGAAGTGGCTTGTCAACCACGCTT  
TCCCTCCCTCAAACAATGCTCCTCACCAA-----CTTGGATTGGGG-----  
AATGAGTAGTTTCGCTCCAGGACTCCACCCCTCGAGAGC-----  
AGGATGCCGGCCGAGATGGAGCTGGAAGCCAACCGTCACTTTCTGGGGCTTGTCCCAACATCTAAATCAAATTGTTGGC  
AGGCTAGAAAAGGAACCGCCAGCCTCAGAAATCAAGCTTTGCGTGGTATGCCCTGCCTATTCACTCGGACAATG--  
CTCTGAACACGAAAGTGTGCAGTTCTGCCCCCTTCTCCCATCCATGCTGAGTCACAGGCAGCGCCTCGGAAAGCACGTAC  
GAGCCACATGCAGGGAAACTTGCACGTGTGGTTCTGGCCGGGGACCCCGGTATACTGTACTAATATGTGTAGGTCCCCGT  
AATTCGAGTGAGATTGTCATGGCGCAAAGCAGATATGGTC

*Cucurbita pepo* subsp. *fraterna* 49

GGTCTTATTCTTATTGTGCGCCTTGTGAGCGCGTTTTGGATCCGCGAAGGCAATCGCTCGGATGTTCTCCTAACCCAACCC  
GGGAACAGACTGGAGGGAATCGCAGCATGGGGAATGTCCGCGTCTCGTCGCAAGGCTCATTTTTTGTGTGGGTGATAGG  
GGAGTTTATCTGATCAAGGGCCGGGGCACAAGGGTCTGGTACTATCCAGGTGCGAAGAACCACGGGGGTGACTGCAATG  
AGCAGAAATCTCACTACCCGGCCTAAACGACGAGCAAACACTCGAACGTGAGAGCAAGGGATCACCCAAGGAATAGACGA  
GCTACAAGGAGGGAGGCAAGAACCATGCTTTTCAGAGACCTAACCCAACCCAAC-----  
GGTAACGGTCCCGAATCTTATCTGAATTGCGAGAATAACTGACTACTAAGCCATGCCTATATATA----  
GGCTCATTCTCCAAACGGCACGGGGCCAAGCCTTTAGGTTCTTTAAGTAGATTGGGTGACAGATCGGCCATAGCAGTACT  
CCGGGATATAAAACAGGGCAACAAATGTGAGCATAACGACGATGCCGCCCGTTTTTCATTTTCGTGGAAGTCCCCGCCAGAG  
GAAAGAAAGGGCTGTAGGTGATGGCGCGTTCCGCTTCTTATCGTCAGAGGGATGAATAAAGGCGGGCCGCTTCAACGGGA  
CCTATTCTCTCTCTTAATAGGCGGCAAAGCAGAATAGGAAA-GGGGCCGAG-TGATTAGTG----  
CCTTTTTAGCCTTTTTCTAAAGACTCTCATGTGAAGCTAACATGGCTCGCTACATAAAAAGTATAGCCAAAGAAAGATGAG  
ACGGGACAGACGGTCAGAGGCCGACGCGGGACTACCATAGGAAAGCCCCCCCCCTCCCGCTAACATAGAAAGTGATTCCC  
GTAAC--TAGTGTCTCTATGTGAATCTCTTCCCGACCAGGCC----GAATCGGGTCACCACTTGGCGTGGG-  
AATGGCTCAGCCACATGCATCATTTGATGAAAGCACTCCAGTCCAGTCCGCTCCTCGAAGTGGCTTGTCAACCACGCTT  
TCCCTCCCTCAAACAATGCTCCTCACCAA-----CTTGGATTGGGG-----  
AATGAGTAGTTTCGCTCCAGGACTCCACCCCTCGAGAGC-----  
AGGATGCCGGCCGAGATGGAGCTGGAAGCCAACCGTCACTTTCTGGGGCTTGTCCCAACATCTAAATCAAATTGTTGGC  
AGGCTAGAAAAGGAACCGCCAGCCTCAGAAATCAAGCTTTGCGTGGTATGCCCTGCCTATTCACTCGGACAATG--  
CTCTGAACACGAAAGTGTGCAGTTCTGCCCCCTTCTCCCATCCATGCTGAGTCACAGGCAGCGCCTCGGAAAGCACGTAC  
GAGCCACATGCAGGGAAACTTGCACGTGTGGTTCTGGCCGGGGACCCCGGTATACTGTACTAATATGTGTAGGTCCCCGT  
AATTCGAGTGAGATTGTCATGGCGCAAAGCAGATATGGTC

*Cucurbita pepo* subsp. *ovifera* 50

GGTCTTATTCTTATTGTGCGCCTTGTGAGCGCGTTTTGGATCCGCGAAGGCAATCGCTCGGATGTTCTCCTAACCCAACCC

GGGAACAGACTGGAGGGAATCGCAGCATGGGGAATGTCCGCGTCTCGTTCGCAAGGCTCATTMTTGTGGTGCATAGG  
GGAGTTTATCTGATCAAGGGCCGGGGCACAAGGGTCTGGTACTATCCAGGTGCGAAGAACCACGGGGGTGACTGCAATG  
AGCAGAAATCTCACTACCGGCCTAAACGACGAGCAAACACTCGAACGTGAGAGCAAGGGATCACCCAAGGAATAGACGA  
GCTACAAGGAGGGAGGCAAGAACCATGCTTTTCAGAGACCTAACCCAACCAAC-----  
GGTAACGGTCCCGAATCTTATCTGAATTGCGAGAATAACTGACTACTAAGCCATGCCTATATATA----  
GGCTCATTCTCCAAACGGCACGGGGCCAAGCCTTTAGGTTCTTTAAGTAGATTGGGTGACAGATCGGCCATAGCAGTACT  
CCGGGATATAAACAGGGCAACAAATGTGAGCATAACGACGATGCCGCCGTTTTTCATTTTCGTGGAAGTCCCCGCCAGAG  
GAAAGAAAGGGCTGTAGGTGATGGCGCGTTCCGCTTCTTATCGTTCAGAGGGATGAATAAAGGCGGGCCGCTTCAACGGGA  
CCTATTCTCTCTCTTAATAGGCGGCAAAGCAGAATAGGAAA-GGGGCCGAG-TGATTAGTG----  
CCTTTTTAGCCTTTTTCTAAAGACTCTCATGTGAAGCTAACATGGCTCGCTACATAAAAAGTATAGCCAAAGAAAGATGAG  
ACGGGACAGACGGTCAGAGGCCGAGCGGGACTACCATAGGAAAGCCCGCCCCCTCCCGCTAACATAGAAAGTGATTCCC  
GTAAC--TAGTGTCTCTATGTGAATCTCTTCCCGACCAGGCC----GAATCGGGTACCACCTTGGCGTGGG-  
AATGGCTCAGCCACATGCATCATTGATGAAAGCACTCCAGTCCAGTCCGCTCCTCGAAGTGGCTTGTCAACCACGCTT  
TCCCTCCCTCAAAACAATGCTCCTCACCAA-----CTTGGATTGGGG-----  
AATGAGTAGTTTCGCTCCAGGACTCCACCCCTCGAGAGC-----  
AGGATGCCGGCCGAGATGGAGCTGGAAGCCAACCGTCACTTTCTGGGGCTTGTCCCAACATCTAAATCAAATTGTTGGC  
AGGCTAGAAAAGGAACCAGCCAGCCTCAGAAATCAAGCTTTGCGTGGTATGCCCTGCCTATTCACTCGGACAATG--  
CTCTGAACACGAAAGTGTGCAGTTCTGCCCCCTTCTCCCATCCATGCTGAGTACAGGCAGCGCCTCGGAAAGCACGTAC  
GAGCCACATGCAGGGAAACTTGCACGTGTGGTTCTGGCCGGGGACCCCGGTATACTGTACTAATATGTGTAGGTCCCCGT  
AATTCGAGTGAGATTGTTCATGGCGCAAAGCAGATATGGTC

*Cucurbita pepo* subsp. *ovifera* 51

GGTCTTATTCTTATTGTGCGCCTTGTGAGCGCTTTGGATCCGCGAAGGCAATCGCTCGGATGTTCTCCTAACCCAACCC  
GGGAACAGACTGGAGGGAATCGCAGCATGGGGAATGTCCGCGTCTCGTTCGCAAGGCTCATTMTTGTGGTGCATAGG  
GGAGTTTATCTGATCAAGGGCCGGGGCACAAGGGTCTGGTACTATCCAGGTGCGAAGAACCACGGGGGTGACTGCAATG  
AGCAGAAATCTCACTACCGGCCTAAACGACGAGCAAACACTCGAACGTGAGAGCAAGGGATCACCCAAGGAATAGACGA  
GCTACAAGGAGGGAGGCAAGAACCATGCTTTTCAGAGACCTAACCCAACCAAC-----  
GGTAACGGTCCCGAATCTTATCTGAATTGCGAGAATAACTGACTACTAAGCCATGCCTATATATA----  
GGCTCATTCTCCAAACGGCACGGGGCCAAGCCTTTAGGTTCTTTAAGTAGATTGGGTGACAGATCGGCCATAGCAGTACT  
CCGGGATATAAACAGGGCAACAAATGTGAGCATAACGACGATGCCGCCGTTTTTCATTTTCGTGGAAGTCCCCGCCAGAG  
GAAAGAAAGGGCTGTAGGTGATGGCGCGTTCCGCTTCTTATCGTTCAGAGGGATGAATAAAGGCGGGCCGCTTCAACGGGA  
CCTATTCTCTCTCTTAATAGGCGGCAAAGCAGAATAGGAAA-GGGGCCGAG-TGATTAGTG----  
CCTTTTTAGCCTTTTTCTAAAGACTCTCATGTGAAGCTAACATGGCTCGCTACATAAAAAGTATAGCCAAAGAAAGATGAG  
ACGGGACAGACGGTCAGAGGCCGAGCGGGACTACCATAGGAAAGCCCGCCCCCTCCCGCTAACATAGAAAGTGATTCCC  
GTAAC--TAGTGTCTCTATGTGAATCTCTTCCCGACCAGGCC----GAATCGGGTACCACCTTGGCGTGGG-  
AATGGCTCAGCCACATGCATCATTGATGAAAGCACTCCAGTCCAGTCCGCTCCTCGAAGTGGCTTGTCAACCACGCTT  
TCCCTCCCTCAAAACAATGCTCCTCACCAA-----CTTGGATTGGGG-----  
AATGAGTAGTTTCGCTCCAGGACTCCACCCCTCGAGAGC-----  
AGGATGCCGGCCGAGATGGAGCTGGAAGCCAACCGTCACTTTCTGGGGCTTGTCCCAACATCTAAATCAAATTGTTGGC  
AGGCTAGAAAAGGAACCAGCCAGCCTCAGAAATCAAGCTTTGCGTGGTATGCCCTGCCTATTCACTCGGACAATG--  
CTCTGAACACGAAAGTGTGCAGTTCTGCCCCCTTCTCCCATCCATGCTGAGTACAGGCAGCGCCTCGGAAAGCACGTAC  
GAGCCACATGCAGGGAAACTTGCACGTGTGGTTCTGGCCGGGGACCCCGGTATACTGTACTAATATGTGTAGGTCCCCGT  
AATTCGAGTGAGATTGTTCATGGCGCAAAGCAGATATGGTC

*Cucurbita pepo* subsp. *ovifera* 52

GGTCTTATTCTTATTGTGCGCCTTGTGAGCGCTTTGGATCCGCGAAGGCAATCGCTCGGATGTTCTCCTAACCCAACCC  
GGGAACAGACTGGAGGGAATCGCAGCATGGGGAATGTCCGCGTCTCGTTCGCAAGGCTCATTMTTGTGGTGCATAGG  
GGAGTTTATCTGATCAAGGGCCGGGGCACAAGGGTCTGGTACTATCCAGGTGCGAAGAACCACGGGGGTGACTGCAATG  
AGCAGAAATCTCACTACCGGCCTAAACGACGAGCAAACACTCGAACGTGAGAGCAAGGGATCACCCAAGGAATAGACGA  
GCTACAAGGAGGGAGGCAAGAACCATGCTTTTCAGAGACCTAACCCAACCAAC-----  
GGTAACGGTCCCGAATCTTATCTGAATTGCGAGAATAACTGACTACTAAGCCATGCCTATATATA----  
GGCTCATTCTCCAAACGGCACGGGGCCAAGCCTTTAGGTTCTTTAAGTAGATTGGGTGACAGATCGGCCATAGCAGTACT  
CCGGGATATAAACAGGGCAACAAATGTGAGCATAACGACGATGCCGCCGTTTTTCATTTTCGTGGAAGTCCCCGCCAGAG  
GAAAGAAAGGGCTGTAGGTGATGGCGCGTTCCGCTTCTTATCGTTCAGAGGGATGAATAAAGGCGGGCCGCTTCAACGGGA  
CCTATTCTCTCTCTTAATAGGCGGCAAAGCAGAATAGGAAA-GGGGCCGAG-TGATTAGTG----  
CCTTTTTAGCCTTTTTCTAAAGACTCTCATGTGAAGCTAACATGGCTCGCTACATAAAAAGTATACCCAAAGAAAGATGAG  
ACGGGACAGACGGTCAGAGGCCGAGCGGGACTACCATAGGAAAGCCCGCCCCCTCCCGCTAACATAGAAAGTGATTCCC  
GTAAC--TAGTGTCTCTATGTGAATCTCTTCCCGACCAGGCC----GAATCGGGTACCACCTTGGCGTGGG-  
AATGGCTCAGCCACATGCATCATTGATGAAAGCACTCCAGTCCAGTCCGCTCCTCGAAGTGGCTTGTCAACCACGCTT  
TCCCTCCCTCAAAACAATGCTCCTCACCAA-----CTTGGATTGGGG-----  
AATGAGTAGTTTCGCTCCAGGACTCCACCCCTCGAGAGC-----  
AGGATGCCGGCCGAGATGGAGCTGGAAGCCAACCGTCACTTTCTGGGGCTTGTCCCAACATCTAAATCAAATTGTTGGC  
AGGCTAGAAAAGGAACCAGCCAGCCTCAGAAATCAAGCTTTGCGTGGTATGCCCTGCCTATTCACTCGGACAATG--  
CTCTGAACACGAAAGTGTGCAGTTCTGCCCCCTTCTCCCATCCATGCTGAGTACAGGCAGCGCCTCGGAAAGCACGTAC  
GAGCCACATGCAGGGAAACTTGCACGTGTGGTTCTGGCCGGGGACCCCGGTATACTGTACTAATATGTGTAGGTCCCCGT  
AATTCGAGTGAGATTGTTCATGGCGCAAAGCAGATATGGTC

Cucurbita pepo subsp.ovifera var. ozarkana 53

GGTCTTATTCTTATTGTGCGCCTTGTGAGCGCGTTTGGATCCGCGAAGGCAATCGCTCGGATGTTCTCCTAACCCAACCC  
GGGAACAGACTGGAGGGAATCGCAGCATGGGGAATGTCCGCGTCTCGTTCGCAAGGCTCATTCTTTTGTGTTGGGTTCATAGG  
GGAGTTTATCTGATCAAGGGCCGGGGCACAAGGGTCTGGTACTATCCAGGTGCGAAGAACCACGGGGGTGACTGCAATG  
AGCAGAAATCTCACTCACCGGCCTAAACGACGAGCAAACACTCGAACGTGAGAGCAAGGGATCACCCAAGGAATAGACGA  
GCTACAAGGAGGGGAGGCAAGAACCATGCTTTTCAGAGACCTAACCCAACCCAAC-----  
GGTAACGGTCCCGAATCTTATCTGAATTGCGAGAATAACTGACTACTAAGCCATGCCTATATATA----  
GGCTCATTCTCCAAACGGCACGGGGCCAAGCCTTTAGGTTCTTTAAGTAGATTGGGTGACAGATCGGCCATAGCAGTACT  
CCGGGATATAAACAGGGCAACAAATGTTCGAGCATAACGACGATGCCGCCGCTTTTTCATTTTCGTGGAAGTCCCCGCCAGAG  
GAAAGAAAGGGCTGTAGGTGATGGCGCGTTCCGCTTCTTATCGTCAGAGGGATGAATAAAGGCGGGCCGCTTCAACGGGA  
CCTATTCTCTCTCTTAATAGGCGGCAAAGCAGAATAGGAAA-GGGGCCGAG-TGATTAGTG----  
CCTTTTTAGCCTTTTTCTAAAGACTCTCATGTGAAGCTAACATGGCTCGCTACATAAAAAGTATAGCCAAAGAAAGATGAG  
ACGGGACAGACGGTTCAGAGGCCGACGCGGGACTACCATAGGAAAGCCCCGCCCTCCCGCTAACATAGAAAGTGATTCCC  
GTAAC--TAGTGTCTCTATGTGAATCTCTTCCCGACCAGGCC----GAATCGGGTCACCACTTGGCGTGGG-  
AATGGCTCAGCCACATGCATCATTGATGAAAGCACTCCAGTCCAGTCCGCTCCTCGAAGTGGCTTGTCAACCACGCTT  
TCCCTCCCTCAAAACAATGCTCCTCACAAA-----CTTGGATTGGGG-----  
AATGAGTAGTTTCGCTCCAGGACTCCACCCCTCGAGAGC-----  
AGGATGCCGGCCGAGATGGAGCTGGAAGCCAACCGTCACTTTCTGGGGCTTGTCCCAACATCTAAATCAAATTGTTGGC  
AGGCTAGAAAAGGAACCAGCCCAGCCTCAGAAATCAAGCTTTGCGTGGTATGCCCTGCCTATTCACTCGGACAATG--  
CTCTGAACACGAAAGTGTGCAGTTCTGCCCCCTTCTCCCATCCATGCTGAGTCACAGGCAGCGCCTCGGAAAGCACGTAC  
GAGCCACATGCAGGGAAACTTGCACGTGTGGTTCTGGCCGGGGACCCCGGTATACTGTACTAATATGTGTAGGTCCCCGT  
AATTCGAGTGAGATTGTTCATGGCGCAAAGCAGATATGGTC

Cucurbita pepo subsp.ovifera var. texana 54

GGTCTTATTCTTATTGTGCGCCTTGTGAGCGCGTTTGGATCCGCGAAGGCAATCGCTCGGATGTTCTCCTAACCCAACCC  
GGGAACAGACTGGAGGGAATCGCAGCATGGGGAATGTCCGCGTCTCGTTCGCAAGGCTCATTCTTTTGTGTTGGGTTCATAGG  
GGAGTTTATCTGATCAAGGGCCGGGGCACAAGGGTCTGGTACTATCCAGGTGCGAAGAACCACGGGGGTGACTGCAATG  
AGCAGAAATCTCACTCACCGGCCTAAACGACGAGCAAACACTCGAACGTGAGAGCAAGGGATCACCCAAGGAATAGACGA  
GCTACAAGGAGGGAGGCAAGAACCATGCTTTTCAGAGACCTAACCCAACCCAAC-----  
GGTAACGGTCCCGAATCTTATCTGAATTGCGAGAATAACTGACTACTAAGCCATGCCTATATATA----  
GGCTCATTCTCCAAACGGCACGGGGCCAAGCCTTTAGGTTCTTTAAGTAGATTGGGTGACAGATCGGCCATAGCAGTACT  
CCGGGATATAAACAGGGCAACAAATGTTCGAGCATAACGACGATGCCGCCGCTTTTTCATTTTCGTGGAAGTCCCCGCCAGAG  
GAAAGAAAGGGCTGTAGGTGATGGCGCGTTCCGCTTCTTATCGTCAGAGGGATGAATAAAGGCGGGCCGCTTCAACGGGA  
CCTATTCTCTCTCTTAATAGGCGGCAAAGCAGAATAGGAAA-GGGGCCGAG-TGATTAGTG----  
CCTTTTTAGCCTTTTTCTAAAGACTCTCATGTGAAGCTAACATGGCTCGCTACATAAAAAGTATAGCCAAAGAAAGATGAG  
ACGGGACAGACGGTTCAGAGGCCGACGCGGGACTACCATAGGAAAGCCCCGCCCTCCCGCTAACATAGAAAGTGATTCCC  
GTAAC--TAGTGTCTCTATGTGAATCTCTTCCCGACCAGGCC----GAATCGGGTCACCACTTGGCGTGGG-  
AATGGCTCAGCCACATGCATCATTGATGAAAGCACTCCAGTCCAGTCCGCTCCTCGAAGTGGCTTGTCAACCACGCTT  
TCCCTCCCTCAAAACAATGCTCCTCACAAA-----CTTGGATTGGGG-----  
AATGAGTAGTTTCGCTCCAGGACTCCACCCCTCGAGAGC-----  
AGGATGCCGGCCGAGATGGAGCTGGAAGCCAACCGTCACTTTCTGGGGCTTGTCCCAACATCTAAATCAAATTGTTGGC  
AGGCTAGAAAAGGAACCAGCCCAGCCTCAGAAATCAAGCTTTGCGTGGTATGCCCTGCCTATTCACTCGGACAATG--  
CTCTGAACACGAAAGTGTGCAGTTCTGCCCCCTTCTCCCATCCATGCTGAGTCACAGGCAGCGCCTCGGAAAGCACGTAC  
GAGCCACATGCAGGGAAACTTGCACGTGTGGTTCTGGCCGGGGACCCCGGTATACTGTACTAATATGTGTAGGTCCCCGT  
AATTCGAGTGAGATTGTTCATGGCGCAAAGCAGATATGGTC

Cucurbita pepo subsp.ovifera var. texana 55

GGTCTTATTCTTATTGTGCGCCTTGTGAGCGCGTTTGGATCCGCGAAGGCAATCGCTCGGATGTTCTCCTAACCCAACCC  
GGGAACAGACTGGAGGGAATCGCAGCATGGGGAATGTCCGCGTCTCGTTCGCAAGGCTCATTCTTTTGTGTTGGGTTCATAGG  
GGAGTTTATCTGATCAAGGGCCGGGGCACAAGGGTCTGGTACTATCCAGGTGCGAAGAACCACGGGGGTGACTGCAATG  
AGCAGAAATCTCACTCACCGGCCTAAACGACGAGCAAACACTCGAACGTGAGAGCAAGGGATCACCCAAGGAATAGACGA  
GCTACAAGGAGGGGAGGCAAGAACCATGCTTTTCAGAGACCTAACCCAACCCAAC-----  
GGTAACGGTCCCGAATCTTATCTGAATTGCGAGAATAACTGACTACTAAGCCATGCCTATATATA----  
GGCTCATTCTCCAAACGGCACGGGGCCAAGCCTTTAGGTTCTTTAAGTAGATTGGGTGACAGATCGGCCATAGCAGTACT  
CCGGGATATAAACAGGGCAACAAATGTTCGAGCATAACGACGATGCCGCCGCTTTTTCATTTTCGTGGAAGTCCCCGCCAGAG  
GAAAGAAAGGGCTGTAGGTGATGGCGCGTTCCGCTTCTTATCGTCAGAGGGATGAATAAAGGCGGGCCGCTTCAACGGGA  
CCTATTCTCTCTCTTAATAGGCGGCAAAGCAGAATAGGAAA-GGGGCCGAG-TGATTAGTG----  
CCTTTTTAGCCTTTTTCTAAAGACTCTCATGTGAAGCTAACATGGCTCGCTACATAAAAAGTATAGCCAAAGAAAGATGAG  
ACGGGACAGACGGTTCAGAGGCCGACGCGGGACTACCATAGGAAAGCCCCGCCCTCCCGCTAACATAGAAAGTGATTCCC  
GTAAC--TAGTGTCTCTATGTGAATCTCTTCCCGACCAGGCC----GAATCGGGTCACCACTTGGCGTGGG-  
AATGGCTCAGCCACATGCATCATTGATGAAAGCACTCCAGTCCAGTCCGCTCCTCGAAGTGGCTTGTCAACCACGCTT  
TCCCTCCCTCAAAACAATGCTCCTCACAAA-----CTTGGATTGGGG-----  
AATGAGTAGTTTCGCTCCAGGACTCCACCCCTCGAGAGC-----  
AGGATGCCGGCCGAGATGGAGCTGGAAGCCAACCGTCACTTTCTGGGGCTTGTCCCAACATCTAAATCAAATTGTTGGC  
AGGCTAGAAAAGGAACCAGCCCAGCCTCAGAAATCAAGCTTTGCGTGGTATGCCCTGCCTATTCACTCGGACAATG--  
CTCTGAACACGAAAGTGTGCAGTTCTGCCCCCTTCTCCCATCCATGCTGAGTCACAGGCAGCGCCTCGGAAAGCACGTAC

GAGCCACATGCAGGGAAACTTGCACGTGTGGTTCTGGCCGGGGACCCCGGTATACTGTACTAATATGTGTAGGTCCCCGT  
AATTCGAGTGAGATTGTCATGGCGCAAAGCAGATATGGT-

*Cucurbita pepo* subsp. *ovifera* var. *texana* 56

GGTCTTATTCTTATTGTGCGCCTTGTGAGCGCGTTTGGATCCGCGAAGGCAATCGCTCGGATGTTCTCCTAACCCAACCC  
GGGAACAGACTGGAGGGAATCGCAGCATGGGGAATGTCCGCGTCTCGTCGCAAGGCTCATTMTTGTGGGTGATAGG  
GGAGTTTATCTGATCAAGGGCCGGGGCACAAGGGTCTGGTACTATCCAGGTGCGAAGAACCACGGGGGTGACTGCAATG  
AGCAGAAATCTCACTACCGGCCTAAACGACGAGCAAACACTCGAACGTGAGAGCAAGGGATCACCCAAGGAATAGACGA  
GCTACAAGGAGGGGAGGCAAGAACCATGCTTTTCAGAGACCTAACCCAACCCAAC-----

GGTAACGGTCCCGAATCTTATCTGAATTGCGAGAATAACTGACTACTAAGCCATGCCTATATATA----

GGCTCATTCTCCAAACGGCACGGGGCCAAGCCTTTAGGTTCTTTAAGTAGATTGGGTGACAGATCGGCCATAGCAGTACT  
CCGGGATATAAACCAGGGCAACAAATGTGAGCATAACGACGATGCCGCCGTTTTTCATTTTCGTGGAAGTCCCCGCCAGAG  
GAAAGAAAGGGCTGTAGGTGATGGCGCGTTCCGCTTCTTATCGTCAGAGGGATGAATAAAGGCGGGCCGCTTCAACGGGA  
CCTATTCTCTCTCTTAATAGGCGGCAAAGCAGAATAGGAAA-GGGGCCGAG-TGATTAGTG----

CCTTTTTAGCCTTTTTCTAAAGACTCTCATGTGAAGCTAACATGGCTCGCTACATAAAAAGTATAGCCAAAGAAAGATGAG  
ACGGGACAGACGGTCAAGGGCCGACGCGGACTACCATAGGAAAGCCCGCCCCCTCCCGCTAACATAGAAAGTATTCCC  
GTAAC--TAGTGTCTCTATGTGAATCTTTCCCGACCAGGCC----GAATCGGGTCACCACTTGGCGTGGG-

AATGGCTCAGCCACATGCATCATTGTGATGAAAGCACTCCAGTCCAGTCCGCTCCTCGAAGTGGCTTGTCAACCACGCTT  
TCCCTCCCTCAAAACAATGCTCCTCACAAA-----CTTGGATTGGGG-----

AATGAGTAGTTTCGCTCCAGGACTCCACCCCTCGAGAGC-----

AGGATGCCGGCCGAGATGGAGCTGGAAGCCAACCGTCACTTTCTGGGGCTTGTCCCAACATCTAAATCAAATTGTTGGC  
AGGCTAGAAAAGGAACCGCCAGCCTCAGAAATCAAGCTTTGCGTGGTATGCCCTGCCTATTCACTCGGACAATG--  
CTCTGAACACGAAAGTGTGAGTTCTGCCCCCTTCTCCATATCGTGTGAGTACAGGCAGCGCCTCGGAAAGCACGTAC  
GAGCCACATGCAGGGAAACTTGCACGTGTGGTTCTGGCCGGGGACCCCGGTATACTGTACTAATATGTGTAGGTCCCCGT  
AATTCGAGTGAGATTGTCATGGCGCAAAGCAGATATGGTC

*Cucurbita pepo* subsp. *ovifera* var. *texana* 57

GGTCTTATTCTTATTGTGCGCCTTGTGAGCGCGTTTGGATCCGCGAAGGCAATCGCTCGGATGTTCTCCTAACCCAACCC  
GGGAACAGACTGGAGGGAATCGCAGCATGGGGAATGTCCGCGTCTCGTCGCAAGGCTCATTMTTGTGGGTGATAGG  
GGAGTTTATCTGATCAAGGGCCGGGGCACAAGGGTCTGGTACTATCCAGGTGCGAAGAACCACGGGGGTGACTGCAATG  
AGCAGAAATCTCACTACCGGCCTAAACGACGAGCAAACACTCGAACGTGAGAGCAAGGGATCACCCAAGGAATAGACGA  
GCTACAAGGAGGGGAGGCAAGAACCATGCTTTTCAGAGACCTAACCCAACCCAAC-----

GGTAACGGTCCCGAATCTTATCTGAATTGCGAGAATAACTGACTACTAAGCCATGCCTATATATA----

GGCTCATTCTCCAAACGGCACGGGGCCAAGCCTTTAGGTTCTTTAAGTAGATTGGGTGACAGATCGGCCATAGCAGTACT  
CCGGGATATAAACCAGGGCAACAAATGTGAGCATAACGACGATGCCGCCGTTTTTCATTTTCGTGGAAGTCCCCGCCAGAG  
GAAAGAAAGGGCTGTAGGTGATGGCGCGTTCCGCTTCTTATCGTCAGAGGGATGAATAAAGGCGGGCCGCTTCAACGGGA  
CCTATTCTCTCTCTTAATAGGCGGCAAAGCAGAATAGGAAA-GGGGCCGAG-TGATTAGTG----

CCTTTTTAGCCTTTTTCTAAAGACTCTCATGTGAAGCTAACATGGCTCGCTACATAAAAAGTATAGCCAAAGAAAGATGAG  
ACGGGACAGACGGTCAAGGGCCGACGCGGACTACCATAGGAAAGCCCGCCCCCTCCCGCTAACATAGAAAGTATTCCC  
GTAAC--TAGTGTCTCTATGTGAATCTTTCCCGACCAGGCC----GAATCGGGTCACCACTTGGCGTGGG-

AATGGCTCAGCCACATGCATCATTGTGATGAAAGCACTCCAGTCCAGTCCGCTCCTCGAAGTGGCTTGTCAACCACGCTT  
TCCCTCCCTCAAAACAATGCTCCTCACAAA-----CTTGGATTGGGG-----

AATGAGTAGTTTCGCTCCAGGACTCCACCCCTCGAGAGC-----

AGGATGCCGGCCGAGATGGAGCTGGAAGCCAACCGTCACTTTCTGGGGCTTGTCCCAACATCTAAATCAAATTGTTGGC  
AGGCTAGAAAAGGAACCGCCAGCCTCAGAAATCAAGCTTTGCGTGGTATGCCCTGCCTATTCACTCGGACAATG--  
CTCTGAACACGAAAGTGTGAGTTCTGCCCCCTTCTCCATCCATGCTGTGAGTACAGGCAGCGCCTCGGAAAGCACGTAC  
GAGCCACATGCAGGGAAACTTGCACGTGTGGTTCTGGCCGGGGACCCCGGTATACTGTACTAATATGTGTAGGTCCCCGT  
AATTCGAGTGAGATTGTCATGGCGCAAAGCAGATATGGTC

*Cucurbita pepo* subsp. *ovifera* var. *texana* 58

GGTCTTATTCTTATTGTGCGCCTTGTGAGCGCGTTTGGATCCGCGAAGGCAATCGCTCGGATGTTCTCCTAACCCAACCC  
GGGAACAGACTGGAGGGAATCGCAGCATGGGGAATGTCCGCGTCTCGTCGCAAGGCTCATTMTTGTGGGTGATAGG  
GGAGTTTATCTGATCAAGGGCCGGGGCACAAGGGTCTGGTACTATCCAGGTGCGAAGAACCACGGGGGTGACTGCAATG  
AGCAGAAATCTCACTACCGGCCTAAACGACGAGCAAACACTCGAACGTGAGAGCAAGGGATCACCCAAGGAATAGACGA  
GCTACAAGGAGGGGAGGCAAGAACCATGCTTTTCAGAGACCTAACCCAACCCAAC-----

GGTAACGGTCCCGAATCTTATCTGAATTGCGAGAATAACTGACTACTAAGCCATGCCTATATATA----

GGCTCATTCTCCAAACGGCACGGGGCCAAGCCTTTAGGTTCTTTAAGTAGATTGGGTGACAGATCGGCCATAGCAGTACT  
CCGGGATATAAACCAGGGCAACAAATGTGAGCATAACGACGATGCCGCCGTTTTTCATTTTCGTGGAAGTCCCCGCCAGAG  
GAAAGAAAGGGCTGTAGGTGATGGCGCGTTCCGCTTCTTATCGTCAGAGGGATGAATAAAGGCGGGCCGCTTCAACGGGA  
CCTATTCTCTCTCTTAATAGGCGGCAAAGCAGAATAGGAAA-GGGGCCGAG-TGATTAGTG----

CCTTTTTAGCCTTTTTCTAAAGACTCTCATGTGAAGCTAACATGGCTCGCTACATAAAAAGTATAGCCAAAGAAAGATGAG  
ACGGGACAGACGGTCAAGGGCCGACGCGGACTACCATAGGAAAGCCCGCCCCCTCCCGCTAACATAGAAAGTATTCCC  
GTAAC--TAGTGTCTCTATGTGAATCTTTCCCGACCAGGCC----GAATCGGGTCACCACTTGGCGTGGG-

AATGGCTCAGCCACATGCATCATTGTGATGAAAGCACTCCAGTCCAGTCCGCTCCTCGAAGTGGCTTGTCAACCACGCTT  
TCCCTCCCTCAAAACAATGCTCCTCACAAA-----CTTGGATTGGGG-----

AATGAGTAGTTTCGCTCCAGGACTCCACCCCTCGAGAGC-----

AGGATGCCGGCCGAGATGGAGCTGGAAGCCAACCGTCACTTTCTGGGGCTTGTCCCAACATCTAAATCAAATTGTTGGC

AGGCTAGAAAAGGAACCAGCCCAGCCTCAGAAATCAAGCTTTGCGTGGTATGCCCTGCCTATTCACTCGGACAATG--  
CTCTGAACACGAAAGTGTGCAGTTCTGCCCCCTTCTCCCATCCATGCTGAGTACAGGCAGCGCCTCGGAAAGCACGTAC  
GAGCCACATGCAGGGAAACTTGCACGTGTGGTTCTGGCCGGGGACCCCGGTATACTGTACTAATATGTGTAGGTCCCCGT  
AATTCGAGTGAGATTGTCATGGCGCAAAGCAGATATGGTC

Cucurbita martinézii 59

GGTCTTATTCTTATTGTGCGCCTTGTGAGCGCGTTTGGATCCGCGAAGGCAATCGCTCGGATGTTCTCCTAACCCAACCC  
GGGAACAGACTGGAGGGAATCGCAGCATGGGGAATGTCCGCGTCTCGTGCAGGCTCATTTTTTTGTGGTGCATAGG  
GGAGTTTATCTGATCAAGGGCCGGGGCACAAGGGTCTGGTACTATCCAGGTGCGAAGAACCACGGGGGTGACTGCAATG  
AGCAGAAATCTCACTACCGGCCTAAACGACGAGCAAACACTCGAACGTGAGAGCAAGGGATCACCCAAGGAATAGACGA  
GCTCCAAGGAGGGAGGCAAGAACCATGCTTTCAGAGACCTAACCCAACCCAAC-----  
GGTAACGGTCCCGAATCTTATCTGAATTGCGAGAATAACTGACTACTAAGCCATGCCTATATATA----  
GGCTCATTCTCCAAACGGCACGGGGCCAAGCCTTTAGGTTCTTTAAGTAGATTGGGTGACAGATCGGCCATAGCAGTACT  
CCGGGATATAAACAGGGCAACAAATGTGAGCATAACGACGATGCCGCCGTTTTTCATTTCTGGAAGTCCCCGCCAGAG  
GAAAGAAAGGGCTGTAGGTGATGGCGCGTTCCGCTTCTTATCGTCAAGGGATGAATAAAGGCGGGCCGCTTCAACGGGA  
CCTATTCTCTCTTAAATAGGCGGCAAAGCAGAATAGGAAA-GGGGCCGAG-TGATTAGTG----  
CCTTTTTACCCTTTTTCTAAAGACTCTCATGTGAAGCTAACATGGCTCGCTACATAAAAGTATAGCCAAAGAAAGATGAG  
ACGGGACAGACGGTCAAGGGCCGAGCGGGACTACCATAGGAAAGCCCGCCCCCTCCCGCTAACATAGAAAGTGATTCCC  
GTAAC--TAGTGTCTCTATGTTTCTCTTCCCGACCAGGCC----GAATCGGGTACCACCTTGGCGTGGG-  
AATGGCTCAGCCACATGCATCATTGATGAAAGCACTCCAGTCCAGTCCGCTCCTCGAAGTGGCTTGTCAACCACGCTT  
TCCCTCCCTCAAAACAATGCTCCTCACAAA-----CTTGGATTGGGG-----  
AATGAGTAGTTCCGCTCCAGGACTCCACCCCTCGAGAGC-----  
AGGATGCCGGCCGAGATGGAGCTGGAAGCCAACCGTCACTTTCTGGGGCTTGTCCCAACATCTAAATCAAATTGTTGGC  
AGGCTAGAAAAGGAACCAGCCCAGCCTCTGAAATCAAGCTTTGCGTGGTATGCCCTGCCTATTCACTCGGACAATG--  
CTCTGAACACGAAAGTGTGCAGTTCTGCCCCCTTCTCCCATCCATGCTGAGTACAGGCAGCGCCTCGGAAAGCACGTAC  
GAGCCACATGCAGGGAAACTTGCACGTGTGGTTCTGGCCGGGGACCCCGGTATACTGTACTAATATGTGTAGGTCCCCGT  
AATTCGAGTGAGATTGTCATGGCGCAAAGCAGATATGGTC

Cucurbita martinézii 60

GGTCTTATTCTTATTGTGCGCCTTGTGAGCGCGTTTGGATCCGCGAAGGCAATCGCTCGGATGTTCTCCTAACCCAACCC  
GGGAACAGACTGGAGGGAATCGCAGCATGGGGAATGTCCGCGTCTCGTGCAGGCTCATTTTTTTGTGGTGCATAGG  
GGAGTTTATCTGATCAAGGGCCGGGGCACAAGGGTCTGGTACTATCCAGGTGCGAAGAACCACGGGGGTGACTGCAATG  
AGCAGAAATCTCACTACCGGCCTAAACGACGAGCAAACACTCGAACGTGAGAGCAAGGGATCACCCAAGGAATAGACGA  
GCTCCAAGGAGGGAGGCAAGAACCATGCTTTCAGAGACCTAACCCAACCCAAC-----  
GGTAACGGTCCCGAATCTTATCTGAATTGCGAGAATAACTGACTACTAAGCCATGCCTATATATA----  
GGCTCATTCTCCAAACGGCACGGGGCCAAGCCTTTAGGTTCTTTAAGTAGATTGGGTGACAGATCGGCCATAGCAGTACT  
CCGGGATATAAACAGGGCAACAAATGTGAGCATAACGACGATGCCGCCGTTTTTCATTTCTGGAAGTCCCCGCCAGAG  
GAAAGAAAGGGCTGTAGGTGATGGCGCGTTCCGCTTCTTATCGTCAAGGGATGAATAAAGGCGGGCCGCTTCAACGGGA  
CCTATTCTCTCTTAAATAGGCGGCAAAGCAGAATAGGAAA-GGGGCCGAG-TGATTAGTG----  
CCTTTTTACCCTTTTTCTAAAGACTCTCATGTGAAGCTAACATGGCTCGCTACATAAAAGTATAGCCAAAGAAAGATGAG  
ACGGGACAGACGGTCAAGGGCCGAGCGGGACTACCATAGGAAAGCCCGCCCCCTCCCGCTAACATAGAAAGTGATTCCC  
GTAAC--TAGTGTCTCTATGTTTCTCTTCCCGACCAGGCC----GAATCGGGTACCACCTTGGCGTGGG-  
AATGGCTCAGCCACATGCATCATTGATGAAAGCACTCCAGTCCAGTCCGCTCCTCGAAGTGGCTTGTCAACCACGCTT  
TCCCTCCCTCAAAACAATGCTCCTCACAAA-----CTTGGATTGGGG-----  
AATGAGTAGTTCCGCTCCAGGACTCCACCCCTCGAGAGC-----  
AGGATGCCGGCCGAGATGGAGCTGGAAGCCAACCGTCACTTTCTGGGGCTTGTCCCAACATCTAAATCAAATTGTTGGC  
AGGCTAGAAAAGGAACCAGCCCAGCCTCTGAAATCAAGCTTTGCGTGGTATGCCCTGCCTATTCACTCGGACAATG--  
CTCTGAACACGAAAGTGTGCAGTTCTGCCCCCTTCTCCCATCCATGCTGAGTACAGGCAGCGCCTCGGAAAGCACGTAC  
GAGCCACATGCAGGGAAACTTGCACGTGTGGTTCTGGCCGGGGACCCCGGTATACTGTACTAATATGTGTAGGTCCCCGT  
AATTCGAGTGAGATTGTCATGGCGCAAAGCAGATATGGTC

Cucurbita foetidissima 61

GGTCTTATTCTTATTGTGCGCCTTGTGAGCGCGTTTGGATCCGCGAAGGCAATCGCTCGGATGTTCTCCTAACCCAACCC  
GGGAACGGACTGGAGGGAATCGCAGCATGGGGAATGTCCGCGTCTCGTGCAGGCTCATTGAAAGTGTGGGTGCATAGG  
GG-  
GTTTATCTGATCAAGGGCCGGGGCACAAGGGTCTGGTACTATCCAGGTGCGAAGAACCACGGGGGTGACTGCAATGAGC  
AGAAATCTCACTACCGGCCTAAACGACGAGCAAACACTCGAACGTGAGAGCAAGGGATCACCCAAGGAATGGACGAGCT  
CCAAGGAGGGAGGCAAGAACCATGCTTTCAGAGACCTAACCCAACCCCC-----GGT-  
CCGAATCTTATCTGAATTGCGAGAATAACTGACTA---AGCCATGCCATATAGA----GGCTCATTCTCCAAA----  
CCGGGGCCAACCTTTAGGTTGTTAAGTAGATTGGGTGACAGATCGGCCATAGCAGTACTCCGGGATATAAACAGGGC  
AACAAATGTGAGCATAACGACGATGCCGCCGTTTTTCATTTCTGGAAGTCCCCGCCAGAGGAAAGAAAGGGCTGTAGGT  
GATGGCCGCTTCCGCTTCTTATCTAGAGAGGGATGAATAAAGGCGGGCCGCTTCAACGGGACCTAT----  
TCTCTTAAATAGGCGGCAAAGCAGAATAGGAAA-GGGGTCGAG-----GAGTG-----  
CCTTTTTAGCCTTTTTCTAAAGACTCTCATGTGAAGCTAACATGGCTCGCTACATACAAGTATAGCCAAAGAAAGATGAG  
ACGGGACGGACGGTCAAGGGCCGAGCGGGACTACCATAGGAAAGCCCGCCCCCTCCCGCTAACATAGAAAGGAGATTCCC  
GTAAC--TAG--TCTCTATGTGAATCTCTTCCCGACCAGGCC----GAATCGGGCCACCACCTTGGGGTGGG-  
AATGGCTCAGCCACATGCATCATTGATGAAAGCACTCCAGTCCAGTCCGCTCCTCGAAGTGGCTTGTCAACCATGCTT

TCCCTCCCTCAAACAATGCTCCTCACAAAAGCG----  
CTTGGATTGGGGCAAGACAGCAATGAGTAGTTTCGCTCCAGGACTCCACCCCTCGAGAGCAGGATGGATGGATGCCGGCC  
GAGATGGAGCTGGAAGCCAACCTAGACTTTCTGGGGCTTGCCCCAACATCTAAATCAAATTGTTGGCAGGCTAGAAAAG  
GAACCCGCCAGCCTTGAATCAAGCTTTGCGTGGTATGCCCTGCCTATTACTCGGACAATGTGCTCTGAACACGAAA  
GTGTGCAGTTCTGCCCCCTTCTCCCAT----  
GCTGAGTCACAGGCAGCGCCTCGGAAAGCACGGACGAGCCACATGCAGGGAAACTTGCACGTGTGGTTCTGGCCGGGGAC  
CCCGGTATACTGTACTAATATGTGTAGGTCCCCGTAATTCGAGTGAGATTGTTCATGGCGCAAAGCAGATATGGTC  
Cucurbita foetidissima 62  
GGTCTTATTCTTATTGTGCGCCTTGTGAGCGCGTTTGGATCCGCGAAGGCAATCGCTCGGATGTTCTCCTAACCCAACCC  
GGGAACGGACTGGAGGGAATCGCAGCATGGGGAATGTCCGCGTCTCGTCGCAAGGCTCATTGAAGTTGTGGGTTCATAGG  
GG-  
GTTTATCTGATCAAGGGCCGGGGCACAAGGGTCTGGTACTATCCAGGTGCGAAGAACCACGGGGGTGACTGCAATGAGC  
AGAAATCTCACTCACCGGCCTAAACGACGAGCAAACACTCGAACGTGAGAGCAAGGGATCACCCAAGGAATGGACGAGCT  
CCAAGGAGGGAGGCAAGAACCATGCTTTTCAGAGACCTAACCCAACCCCTC-----GGT-  
CCGAATCTTATCTGAATTGCGAGAATAACTGACTA---AGCCATGCCATATAGA---GGCTCATTCTCCAAA----  
CCGGGGCAACCCCTTAGGTTGTTAAGTAGATTGGGTGACAGATCGGCCATAGCAGTACTCCGGGATATAAACCCAGGGC  
AACAAATGTCGAGCATAACGACGATGCCCGCTTTTCATTTTCGTGGAAGTCCCCGCCAGAGGAAAGAAAGGGCTGTAGGT  
GATGGCGCGTTCCGCTTCTTATCTAGAGAGGGATGAATAAAGGCGGGCCGCTTCAACGGGACCTAT----  
TCTCTTAATAGGCGCAAAGCAGAATAGGAAA-GGGGTCGAG-----GAGTG-----  
CCTTTTTAGCCTTTTTCTAAAGACTCTCATGTGAAGCTAACATGGCTCGCTACATACAAGTATAGCCAAAGAAAGATGAG  
ACGGGACGGACGGTCAGAGGCCGCGACGGGACTACCATAGGAAAGCCCGCCCCCTCCCGCTAACATAGAAGGAGATTCCC  
GTAAC--TAG--TCTCTATGTGAATCTTTCCCGACCAGGCC----GAATCGGGCCACCCTTGGGGTGGG-  
AATGGCTCAGCCACATCATTGATGAAAGCACTCCAGTCCAGTCCGCTCCTCGAAGTGGCTTGTCAACCATGCTT  
TCCCTCCCTCAAACAATGCTCCTCACAAAAGCG----  
CTTGGATTGGGGCAAGACAGCAATGAGTAGTTTCGCTCCAGGACTCCACCCCTCGAGAGCAGGATGGATGGATGCCGGCC  
GAGATGGAGCTGGAAGCCAACCTAGACTTTCTGGGGCTTGCCCCAACATCTAAATCAAATTGTTGGCAGGCTAGAAAAG  
GAACCCGCCAGCCTTGAATCAAGCTTTGCGTGGTATGCCCTGCCTATTACTCGGACAATGTGCTCTGAACACGAAA  
GTGTGCAGTTCTGCCCCCTTCTCCCAT----  
GCTGAGTCACAGGCAGCGCCTCGGAAAGCACGGACGAGCCACATGCAGGGAAACTTGCACGTGTGGTTCTGGCCGGGGAC  
CCCGGTATACTGTACTAATATGTGTAGGTCCCCGTAATTCGAGTGAGATTGTTCATGGCGCAAAGCAGATATGGTC  
Cucurbita ficifolia 63  
GGTCTTATTCTTATTGTGCGCCTTGTGAGCGCGTTTGGATCCGCGAAGGCAATCGCTCGGATGTTCTCCTAACCCAACCC  
GGGAACGGACTGGAGGGAATCGCAGCATGGGGAATGTCCGCGTCTCGTCGCAAGGCTCATTGAGTTGTGGGTTCATAGG  
GGGGTTTATCTGATCAAGGGCCGGGGCACAAGGGTCTGGTACTATCCAGGTGCGAAGAACCACGGGGGTGACTGCAATG  
AGCAGAAATCTCACTCACCGGCCTAAACGACGAGCAAACACTCGAACGTGAGAGCAAGGGATCACCCAAGGAATGGACGA  
GCTCCAAGGAGGGAGGCAAGAACCATGCTTTTCAGAGACCTAACCCAACCCCTC-----GGT-  
CCGAATCTTATCTGAATTGCGAGAATAACGGACTA---  
AGCCATGCCTATATATATATAGGCTCATTCTCAAACCGGCGCGGGGCCAAGCCTTTAGGTTGTTAAGTAGATTGGGTGA  
CAGATCGGCCATAGCAGTACTCCGGGATATAAACCCAGGGCAACAAATGTCCAGCATAACGACGATGCCGCCCGTTTTCATT  
TCGTGGAAGTCCCCGCCAGAGGAAAGAAAGGGCTGTAGGTGATGGCGCGTTCTGCTTCTTATCTAGAGAGGGATGAATAA  
AGGCGGGCCGCTTCAACGGGACCTAT----TCTCTTAATAGGCGGCAAAGCANAATAGGAAA-GGGGCCGAG-  
TGATGAGTG----  
CCTTTTTAGCCTTTTTCTAAAGACTCTCATGTGAAGCTAACATGGCTCGCTACATACAAGTATAGCCAAAGAAAGATGAG  
ACGGGACGGACGGTCAGAGGCCGCGACGGGACTACCATAGGAAAGCCCGCCCCCTCCCGCTAACATAGAAGGAGATTCCC  
GTAAC--TAG--TCTCTATGTGAATCTTTCCCGACCAGGCC----GAATCGGGCCACCCTTGGGGTGGG-  
AATGGCTCAGCCACATGCATCATTGATGAAAGCACTCCAGTCCAGTCCGCTCCTCGAAGTGGCTTGTCAACCACGCTT  
TACCTCCCTCAAACAATGCTCCTCACAAAAGCCCTTCTTGGATTGGGGCAACACAGCAATGAGTAGTTTCGCTCCAGG  
ACTCCACCCCTCGAGAGC-----  
AGGATGCCGGCCGAGATGGAGCTGGAAGCCAACCTAGACTTTCTGGGGCTTGCCCCAACATCTAAATCAAATTGTTGGC  
AGGCTAGAAAAGGAACCAGCCAGCCTCTGAAATCAAGCTTTGCGTGGTATGCCCTGCCTATTACTCGGACAATG--  
CTCTGAACACGAAAGTGTGCAGTTCCGCCCCCTTCTCCCAT----  
GCTGAGTCACAGGCAGCGCCTCGGAAAGCACGGACGAGCCACATGCAGGGAAACTTGCACGTGTGGTTCTGGCCGGGGAC  
CCCGGTATACTGTACTAATATGTGTAGGTCCCCGTAATTCGAGTGAGATTGTTCATGGCGCAAAGCAGATATGGTC  
Cucurbita ficifolia 64  
GGTCTTATTCTTATTGTGCGCCTTGTGAGCGCGTTTGGATCCGCGAAGGCAATCGCTCGGATGTTCTCCTAACCCAACCC  
GGGAACGGACTGGAGGGAATCGCAGCATGGGGAATGTCCGCGTCTCGTCGCAAGGCTCATTGAGTTGTGGGTTCATAGG  
GGGGTTTATCTGATCAAGGGCCGGGGCACAAGGGTCTGGTACTATCCAGGTGCGAAGAACCACGGGGGTGACTGCAATG  
AGCAGAAATCTCACTCACCGGCCTAAACGACGAGCAAACACTCGAACGTGAGAGCAAGGGATCACCCAAGGAATGGACGA  
GCTCCAAGGAGGGAGGCAAGAACCATGCTTTTCAGAGACCTAACCCAACCCCTC-----GGT-  
CCGAATCTTATCTGAATTGCGAGAATAACGGACTA---  
AGCCATGCCTATATATATATAGGCTCATTCTCAAACCGGCGCGGGGCCAAGCCTTTAGGTTGTTAAGTAGATTGGGTGA  
CAGATCGGCCATAGCAGTACTCCGGGATATAAACCCAGGGCAACAAATGTCCAGCATAACGACGATGCCGCCCGTTTTCATT  
TCGTGGAAGTCCCCGCCAGAGGAAAGAAAGGGCTGTAGGTGATGGCGCGTTCTGCTTCTTATCTAGAGAGGGATGAATAA  
AGGCGGGCCGCTTCAACGGGACCTAT----TCTCTTAATAGGCGGCAAAGCANAATAGGAAA-GGGGCCGAG-

TGATGAGTG----  
CCTTTTTAGCCTTTTTCTAAAGACTCTCATGTGAAGCTAACATGGCTCGCTACATACAAGTATAGCCAAAGAAAGATGAG  
ACGGGACGGACGGTCAGAGGCCGCGAGCGGGACTACCATAGGAAAGCCCCCCCCCTCCCGCTAACATAGAAAGAGATTCCC  
GTAAC--TAG--TCTCTATGTGAATCTCTTCCCGACCAGGCC----GAATCGGGCCACCCTTGGGGTGGG-  
AATGGCTCAGCCACATGCATCATTGTGATGAAAGCACTCCAGTCCAGTCGCCTCCTCGAAGTGGCTTGTCAACCACGCTT  
TACCTCCCTCAAACAATGCTCCTCACAAAAGCCCTTCTTGGATTGGGGCAACACAGCAATGAGTAGTTTCGCTCCAGG  
ACTCCACCCCTCGAGAGC-----  
AGGATGCCGGCCGAGATGGAGCTGGAAGCCAACCTAGACTTTCTGGGGCTTGCCCCAACATCTAAATCAAATTGTTGGC  
AGGCTAGAAAAGGAACCAGCCCAGCCTCTGAAATCAAGCTTTGCGTGGTATGCCCTGCCTATTCACTCGGACAATG--  
CTCTGAACACGAAAGTGTGCAGTTCGGCCCCCTTCTCCCAT----  
GCTGAGTCACAGGCAGCGCCTCGGAAAGCACGGACGAGCCACATGCAGGGAACTTGCACGTGTGGTTCTGGCCGGGGAC  
CCCGGTATACTGTACTAATATGTGTAGGTCCCCGTAATTCGAGTGAGATTGTCATGGCGCAAAGCAGATATGGTC  
*Cucurbita ficifolia* 65  
GGTCTTATTCTTATTGTGCGCCTTGTGAGCGCGTTTGGATCCGCGAAGGCAATCGCTCGGATGTTCTCCTAACCCAACCC  
GGGAACGGACTGGAGGGAATCGCAGCATGGGGAATGTCCGCGTCTCGTCGCAAGGCTCATTGAGTTGTGGGTCTATAGG  
GGGGTTTATCTGATCAAGGGCCGGGGCACAAGGGTCTGGTACTATCCAGGTGCGAAGAACCACGGGGGTGACTGCAATG  
AGCAGAAATCTCACTCACCAGCCTAAACGACGAGCAAACACTCGAACGTGAGAGCAAGGGATCACCCAAGGAATGGACGA  
GCTCCAAGGAGGGAGGCAAGAACCATGCTTTTCCAGAGACCTAACCCAACCCCTT-----GGT-  
CCGAATCTTATCTGAATTGCGAGAATAACGGACTA---  
AGCCATGCCTATATATATATAGGCTCATTCTCAAACCGCGCGGGGCCAAGCCTTTAGGTTGTTAAAGTAGATTGGGTGA  
CAGATCGGCCATAGCAGTACTCCGGGATATAAACCAGGGCAACAAATGTCCAGCATAACGACGATGCCGCCCGTTTTCATT  
TCGTGGAAGTCCCCGCCAGAGGAAAGAAAGGGCTGTAGGTGATGGCGCGTTCTGCTTCTTATCTAGAGAGGGATGAATAA  
AGCGGGCCCGTTCAACGGGACCTAT----TCTCTTAATAGGCGGCAAAGCANAATAGGAAA--GGGGCCGAG-  
TGATGAGTG----  
CCTTTTTAGCCTTTTTCTAAAGACTCTCATGTGAAGCTAACATGGCTCGCTACATACAAGTATAGCCAAAGAAAGATGAG  
ACGGGACGGACGGTCAGAGGCCGCGAGCGGGACTACCATAGGAAAGCCCCCCCCCTCCCGCTAACATAGAAAGAGATTCCC  
GTAAC--TAG--TCTCTATGTGAATCTCTTCCCGACCAGGCC----GAATCGGGCCACCCTTGGGGTGGG-  
AATGGCTCAGCCACATGCATCATTGTGATGAAAGCACTCCAGTCCAGTCGCCTCCTCGAAGTGGCTTGTCAACCACGCTT  
TACCTCCCTCAAACAATGCTCCTCACAAAAGCCCTTCTTGGATTGGGGCAACACAGCAATGAGTAGTTTCGCTCCAGG  
ACTCCACCCCTCGAGAGC-----  
AGGATGCCGGCCGAGATGGAGCTGGAAGCCAACCTAGACTTTCTGGGGCTTGCCCCAACATCTAAATCAAATTGTTGGC  
AGGCTAGAAAAGGAACCAGCCCAGCCTCTGAAATCAAGCTTTGCGTGGTATGCCCTGCCTATTCACTCGGACAATG--  
CTCTGAACACGAAAGTGTGCAGTTCGGCCCCCTTCTCCCAT----  
GCTGAGTCACAGGCAGCGCCTCGGAAAGCACGGACGAGCCACATGCAGGGAACTTGCACGTGTGGTTCTGGCCGGGGAC  
CCCGGTATACTGTACTAATATGTGTAGGTCCCCGTAATTCGAGTGAGATTGTCATGGCGCAAAGCAGATATGGTC  
*Citrullus lanatus*  
GGTCTTATTCTTATTGTGCGCCTTGTGAGCGCGTTTGGATCCGCGAAGGCAATCGCTCGGATGTTCTCCTAACCCAACCC  
GGGAACGGACTGGAGGGAATCGCAGCATGGGGAATGTCCGCGTCTCGTCGCAAGGCTCATTGAGTTGTGGGTCTATAGG  
GGGGTTTATCTGATCAAGGGCCGGGGCACAAGGGTCTGGTACTATCCAGGTGCGAAGAACCACGGGGGTGACTGCAATG  
AGCAGAAATCTCACTCACCAGCCTAAACGACGAGCAAACACTCGAACGTGAGAGCAAGGGATCACCCAAGGAATGGACGA  
GCTCCAAGGAGGGAGGCAAGAACCCTGCTTTTCCAGAGA-----AGTGGCGGT-  
CCGAATCTTATCTGAATTGCGAGAATAACTGACTC---AGCCATGCCTATATATA----  
GGCTCATTCTCAAACGGCGCGGGGCCAAGCCTTTAGGTTGTTAAAGTAGATTGGGTGACAGATCGGCCATAGCAGTACT  
CCGGGATATAAACCAGGGCAACAAATGTGAGCATAACGACGATGCCGCCCGTTTTCATTTCTGGAAGTCCCCGGCAGAG  
GAAAGAAAGGGCTGTAGGTGATGGCGCGTTCTGCTTCTTATCTAGAGAGGGATGAATAAAGGCGGGCCGCTTCAACGGGA  
CCTAT----TCTCTTAATAGGCGGCAAAGCGGAATAGGAAA-  
GGGGCCGAGCTGACTGATGAGTGCCTTTTTAGCCTTTAGAAAAGGCTCTCATGTGAAGCTAACATGGCTGGCTACATAG  
AAGTATAGCCAAAGAAAGATGAGACGGGACGGACGGTACAGAGGCCGAGCGGGACTACCATAGGAAAGCCCCCCCCCTCC  
CGCTAACATAAAAAGAGATTCCCGTAACGTAAGAGTCTCTATGTGAATCTCTTCCCGACCAGGCC----  
GAATCGGGCCACCCTTGGGGTGGGGAATGGCTCACCCACATGCATCATTGATGAAAGCACTCCAGTCCAGTCCGCTC  
CTCGAAGTGGCTTGTCAACCACGCTTTCCCTCCCTCAAACAATGCTCCTCACAAAAGCCCTTCTTGGATTGGGGCAA  
CACAGCAATGAGTAGTTTCGCTCCAGGACTCCACCCCTCGAGAGC-----  
AGGATGCCGGCCGAGATGGAGCTGGAAGCCAACCTATACTTTCTGGGGCTTGCCCCAACATCTAAATCAAATTGTTGGC  
GGGCTAGAAAAGGAACCAGCCCAGCCTCTTCAAGAAAGCTTTGCGTGGTAGGCGCTGCCTATTCACTCGGACAATG--  
CTCTGAACACGAAAGTGTGCAGTTCGGCCCCCTTCTCCCAT----  
GCTGAGTCACAGGCAGCGCCTCGGAAAGCACGGACGAGCCACATGCAGGGAACTTGCACGTGTGGTTCTGGCCGGGGAC  
CCCGGTATACTGTACTAATATGTGTAGGTCCCCGTAATTCGAGTGAGATTGTCATGGCGCAAAGCAGATATGGTC  
*Sechium edule*  
GGTCTTATTCTTATTGTGCGCCTTGTGAGCGCGTTTGGATCCGCGAAGGCAATCGCTCGGATGTTCTCCTAACCCAACCC  
GGGAACGGACTGGAGGGAATCGCAGCATGGGGAATGTCCGCGTCTCGTCGCAAGGCTCATTGAGTTGTGGGTCTATAGT  
GGGGTTTATCTGATCAAGGGCCGGGGCACAAGGGTCTGGTACTATCCAGGTGCGAAGAACCACGGGGGTGACTGCAATG  
AGCAGAAATCTCACTCACCAGCCTAAACGACGAGCAAACACTCGAACGTGAGAGCAAGGGATCACCCAAGGAATGGACGA  
GCTCCAAGGAGGGAGGCAAGAACCATGCTTTTCCAGAGA-----AGTGGCGGT-  
CCGAATCTTATCTGAATTGCGAGAATAACTGACTA---AGCCATGCCTATATATA----

GGCTCATTCTCCAAACGGCGCGGGCCAAGCCTTTAGGTTGTTTAAAGTAGATTGGGTGACAGATCGGCCATAACAGTACT  
CCGGGATATAAACAGGGCAACAAATGTCGAGCATAACGACGATGCCGCCCGTTTTTCATTTTCGTGGAAGTCCCCGGCAGAG  
GAAAGAAAGGGCTGTAGGTGATGGCGCGTTCTGCTTCGCTTCGTATA---  
GATGAATAAAGGCGGGCCGCTTCAGCGGGACCTAT----TCTCTTAATAGGCGGCAAAGCGGAATAGGAAA-  
GGGCGGAGCTGACTGATGAGTGCCTTTTTAGCCTTTTTCTAAAGGCTCTCATGTGAAGCTAACATGGCTGGCTACATAC  
AAGTATAGCCAACCTCAAGATGAGACGGGACGGNCGGTTCAGAGGCCGAGCGGGACTA-----  
-----  
-----  
-----  
TGGATTGGGGCAACACAGCAATGAGTAGTTCGCTCCAGGACTCCACCCCTCGAGAGC-----  
AGGATGCCGGCCGAGATGGAGCTGGAAGCCAACNTATACTTTCTGGGGCTTGCCCAACATCTAAATCAAATTGTTGGC  
GGGCTAGAAAAGGAACCAGCCCAGCCTCTTCAAGAAAGCTTTGCGTGGTAGGCGCTGCCTATTCACTCGGACAATG--  
CTCTGAACACGAAAGTGTGCAGTTCGCCCCCTTCTCCCAT----  
GCTGAGTCAGAGGCAGCGCCTCGGAAAGCACGGACGAGCCACATGCAGGGAAACTTGCACGTGTGGTTCTGGCCGGGGAC  
CCCGGTATACTGTACTAATATGTGTAGGTCCCCGTAATTCGAGTGAGATTGTCATGGCGCAAAGCAGATATGGTC
