# Supplementary material
Source: PubMed Central journal article supplement (PMC117595)
Supplement: pnas_99_1_535__2.pdf [file pnas_99_1_535__2.pdf]

**Table 2. List and derivation of samples analyzed**

| <b>Individual no.</b> | <b>Species</b>                             | <b>Origin</b> | <b>Locality</b> | <b>Collection*</b> | <b>Accession no.</b> |
|-----------------------|--------------------------------------------|---------------|-----------------|--------------------|----------------------|
| 1                     | <i>Cucurbita andreana</i>                  | Argentina     | Buenos Aires    | NYBG               | 32.1                 |
| 2                     | <i>C. andreana</i>                         | Bolivia       | Santa Cruz      | MN                 | 48836                |
| 3                     | <i>C. andreana</i>                         | Bolivia       | Santa Cruz      | MN                 | 48864                |
| 4                     | <i>Cucurbita maxima</i>                    | Ecuador       | San Antonio     | TA                 | 407.1                |
| 5                     | <i>C. maxima</i>                           | Ecuador       | San Antonio     | TA                 | 407.4                |
| 6                     | <i>C. maxima</i>                           | Ecuador       | Calacali        | TA                 | 409                  |
| 7                     | <i>C. maxima</i>                           | Ecuador       | Manabí          | TA                 | 420.1                |
| 8                     | <i>C. maxima</i>                           | Ecuador       | Macará          | TA                 | 445                  |
| 9                     | <i>C. maxima</i> ‘Candy’                   | U.S.          | Commercial      | TA                 |                      |
| 10                    | <i>C. maxima</i> ‘Turks Cap’               | U.S.          | Commercial      | TA                 |                      |
| 11                    | <i>Cucurbita ecuadorensis</i>              | Ecuador       | Concepción      | TA                 | 406                  |
| 12                    | <i>C. ecuadorensis</i>                     | Ecuador       | Portoviejo      | TA                 | 427                  |
| 13                    | <i>C. ecuadorensis</i>                     | Ecuador       | Catacocha       | TA                 | 438                  |
| 14                    | <i>C. ecuadorensis</i>                     | Ecuador       | El Empalme      | TA                 | 442                  |
| 15                    | <i>C. ecuadorensis</i>                     | Ecuador       | Guayaquil       | USDA               | PI 432443            |
| 16                    | <i>C. ecuadorensis</i>                     | Ecuador       |                 | MN                 | 73**                 |
| 17                    | <i>Cucurbita sororia</i>                   | Panama        | Las Tablas      | TA/DP              | 30**                 |
| 18                    | <i>C. sororia</i>                          | Mexico        | Jalisco         | MN/TA              | PI532398**           |
| 19                    | <i>C. sororia</i>                          | Mexico        | Colima          | MN/TA              | PI532397**           |
| 20                    | <i>C. sororia</i>                          | Mexico        | Michoacan       | MN/TA              | PI532393**           |
| 21                    | <i>C. sororia</i>                          | Mexico        | Taumalipas      | MN/TA              | PI532411**           |
| 22                    | <i>C. sororia</i>                          | Mexico        | Chiapas         | MN/TA              | PI532408**           |
| 23                    | <i>Cucurbita argyrosperma</i>              | Mexico        | San Luis Potosí | MN/TA              | PI532337**           |
| 24                    | <i>C. argyrosperma</i> ‘Taos’<br>seed type | Mexico        | Michoacán       | MN/TA              | PI532338**           |
| 25                    | <i>Cucurbita moschata</i> ,<br>“Soler”     | Puerto Rico   | Mayaguez        | LWB                | 1**                  |
| 26                    | <i>C. moschata</i>                         | Panama        | Los Santos      | TA/DP              | 2**                  |
| 27                    | <i>C. moschata</i>                         | Mexico        | Quintana Roo    | TA/MN              | 110**                |
| 28                    | <i>C. moschata</i>                         | Puerto Rico   | Mayaguez        | LWB                | 122**                |
| 29                    | <i>C. moschata</i>                         | Colombia      |                 | LWB                | 127**                |
| 30                    | <i>C. moschata</i>                         | Venezuela     | Commercial      | IH                 | 5.1**                |
| 31                    | <i>C. moschata</i>                         | Panama        | Los Santos      | TA/DP              | 87**                 |
| 32                    | <i>C. moschata</i>                         | Panama        | Los Santos      | TA/DP              | 93**                 |
| 33                    | <i>C. moschata</i>                         | Ecuador       | San Vicente     | TA                 | 416                  |
| 34                    | <i>C. moschata</i>                         | Ecuador       | Palmar          | TA                 | 423                  |
| 35                    | <i>C. moschata</i>                         | Ecuador       | Nalpe           | TA                 | 425                  |
| 36                    | <i>C. moschata</i>                         | Ecuador       | Naranjal        | TA                 | 428.2                |
| 37                    | <i>C. moschata</i>                         | Bolivia       |                 | LWB                | 219**                |

|    |                                                           |         |                 |       |            |
|----|-----------------------------------------------------------|---------|-----------------|-------|------------|
| 38 | <i>C. moschata</i>                                        | Bolivia |                 | LWB   | 342.1**    |
| 39 | <i>C. moschata</i>                                        | Bolivia |                 | LWB   | 359**      |
| 40 | <i>C. moschata</i>                                        | Bolivia |                 | LWB   | 370.3**    |
| 41 | <i>C. moschata</i>                                        | Bolivia |                 | LWB   | 370.5**    |
| 42 | <i>Cucurbita pepo</i> subsp. <i>pepo</i>                  | Ecuador | Loja            | TA    | 433        |
| 43 | <i>C. pepo</i> subsp. <i>pepo</i> 'Lunga di Toscana'      | Italy   |                 | TA    | **         |
| 44 | <i>C. pepo</i> subsp. <i>pepo</i> 'spaghetti squash'      | U.S.    | Commercial      | TA    |            |
| 45 | <i>C. pepo</i> subsp. <i>pepo</i>                         | Hungary |                 | USDA  | PI 531323  |
| 46 | <i>C. pepo</i> subsp. <i>pepo</i>                         | Panama  | Commercial      | TA    |            |
| 47 | <i>C. pepo</i> subsp. <i>fraterna</i>                     | Mexico  | Taualipas       | MN/TA | 79**       |
| 48 | <i>C. pepo</i> subsp. <i>fraterna</i>                     | Mexico  | Taualipas       | USDA  | PI 532355  |
| 49 | <i>C. pepo</i> subsp. <i>fraterna</i>                     | Mexico  | Taualipas       | USDA  | Ames 7926  |
| 50 | <i>C. pepo</i> subsp. <i>ovifera</i> "acorn squash"       | U.S.    | Commercial      | DP    |            |
| 51 | <i>C. pepo</i> subsp. <i>ovifera</i> "striped pear gourd" | U.S.    | Commercial      | TA    |            |
| 52 | <i>C. pepo</i> subsp. <i>ovifera</i> "bicolor"            | U.S.    | Commercial      | TA    |            |
| 53 | <i>C. pepo</i> subsp. <i>ovifera</i> var. <i>ozarkana</i> | U.S.    | Arkansas        | TA    |            |
| 54 | <i>C. pepo</i> subsp. <i>ovifera</i> var. <i>texana</i>   | U.S.    | Texas           | USDA  | PI 285213  |
| 55 | <i>C. pepo</i> subsp. <i>ovifera</i> var. <i>texana</i>   | U.S.    | Texas           | USDA  | PI 540907  |
| 56 | <i>C. pepo</i> subsp. <i>ovifera</i> var. <i>texana</i>   | U.S.    | Mississippi     | USDA  | Ames22730  |
| 57 | <i>C. pepo</i> subsp. <i>ovifera</i> var. <i>texana</i>   | U.S.    | Mississippi     | TA    | 314-78     |
| 58 | <i>C. pepo</i> subsp. <i>ovifera</i> var. <i>texana</i>   | U.S.    | Mississippi     | TA    | 74-97      |
| 59 | <i>Cucurbita martinezii</i> Bailey                        | Mexico  | Veracruz        | MN/TA | PI532372** |
| 60 | <i>C. martinezii</i> Bailey                               | Mexico  | San Luis Potosi | USDA  | PI 512099  |
| 61 | <i>Cucurbita foetidissima</i>                             | Mexico  | Guanajuato      | USDA  | PI 442195  |
| 62 | <i>C. foetidissima</i>                                    | Mexico  | Zacatecas       | USDA  | PI 442203  |
| 63 | <i>Cucurbita ficifolia</i>                                | U.S.    | Georgia         | TA    | G9450**    |
| 64 | <i>C. ficifolia</i>                                       | Mexico  | Oaxaca          | TA    | PI532348** |
| 65 | <i>C. ficifolia</i>                                       | Ecuador | San Antonio     | TA    | 408        |
|    | <i>Citrullus lanatus</i>                                  | Peru    |                 |       |            |
|    | <i>Sechium edule</i>                                      | Panama  | Commercial      | OS    |            |

\*TA, Tom Andres; MN, Michael Nee; LWB, Linda Wessel-Beaver; IH, Irene Holst, DP, Dolores Piperno; OS, Oris Sanjur; NYBG, New York Botanical Garden; USDA, U.S. Department of Agriculture.

\*\*Grown from seed by L.W.-B. at Isabela, Puerto Rico.
