# Supplementary material
Source: PubMed Central journal article supplement (PMC117595)

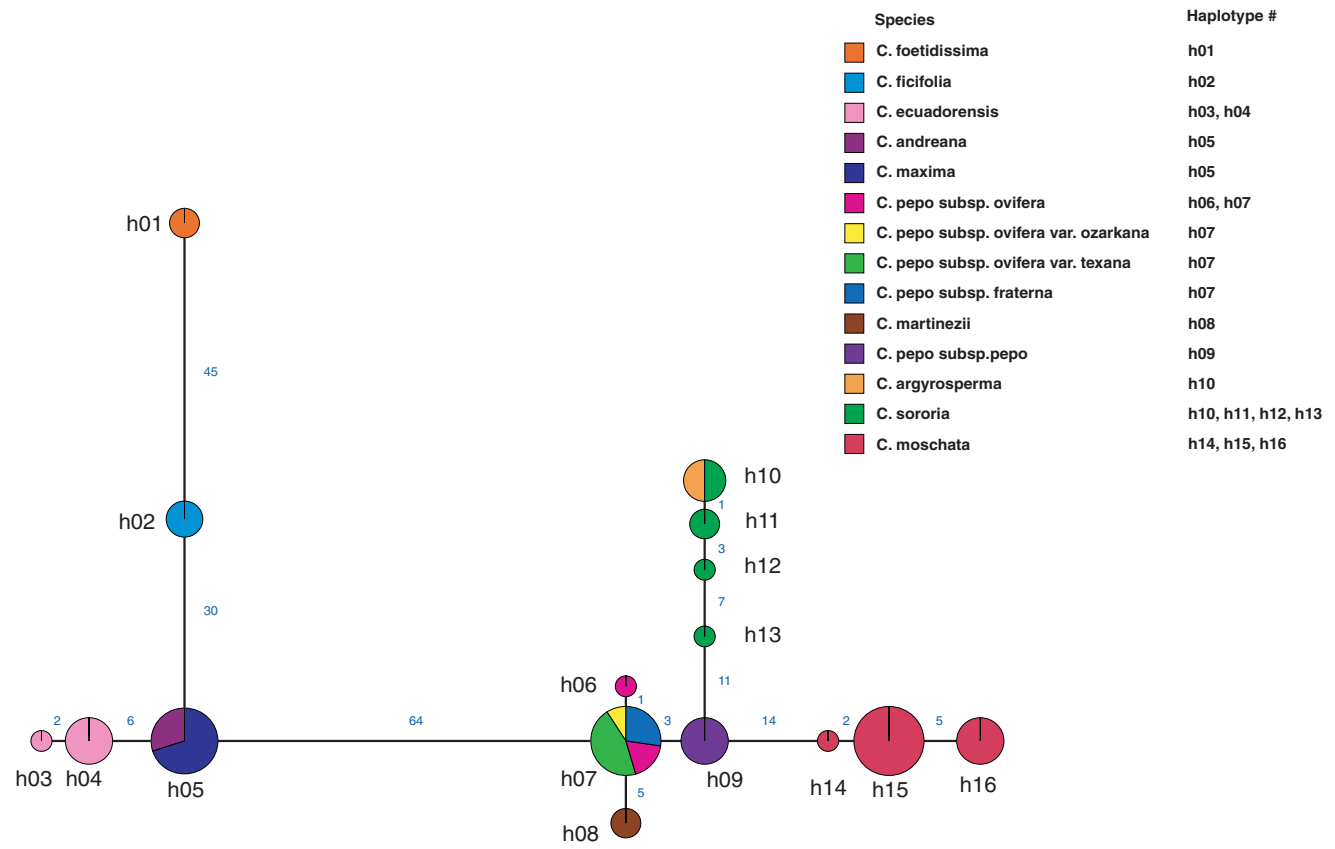

Supplement: pnas_99_1_535__5.pdf [file pnas_99_1_535__5.pdf]
